# Supplementary material for: Overlooked potential of N,N-bidentate directing-groups in Ni-catalyzed C–H functionalization of benzamides
Source: Royal Society of Chemistry journal article supplement (doi:10.1039/d2cc06177e), 2022-12-19
Supplement: d2cc06177e1.pdf [file d2cc06177e1.pdf]

## Supplementary Information

### Overlooked Potential of N, N-Bidentate Directing-Groups in NiCatalyzed C-H Functionalization of Benzamides

Weirong Wu,<sup>a</sup> Xufang Zhao,<sup>c</sup> Guang Chen,<sup>c</sup> Lingjun Liu,<sup>f</sup> Yulin Li,<sup>b</sup> Tao Chen,<sup>b</sup> Tony D.

James<sup>\*de</sup> and Yuxia Liu<sup>\*c</sup>

#### Contents

|                                                       |          |
|-------------------------------------------------------|----------|
| ○ Computational details.....                          | S2-S3    |
| ○ Tables S1-S2.....                                   | S4-S5    |
| ○ Scheme S1.....                                      | S6       |
| ○ Figs. S1-S9.....                                    | S7-S15   |
| ○ Table S3 (Energies and imaginary frequencies) ..... | S16-S17  |
| ○ Table S4.....                                       | S18      |
| ○ Cartesian coordinates.....                          | S19-S156 |

---

<sup>a</sup> School of Environment and Chemical Engineering, Chongqing Three Gorges University, Chongqing, China

<sup>b</sup> Key Laboratory of Tibetan Medicine Research & Qinghai Key Laboratory of Qinghai-Tibet Plateau Biological Resources, Northwest Institute of Plateau Biology, Chinese Academy of Science, Xining 810001, Qinghai P. R. China.

<sup>c</sup> Shaanxi Key Laboratory of Chemical Additives for Industry, College of Chemistry and Chemical Engineering, Shaanxi University of Science and Technology, Xi'an 710021, China. E-mail: liuyuxia2008@163.com

<sup>d</sup> Department of Chemistry, University of Bath, Bath, UK BA2 7AY. E-mail: chstdj@bath.ac.uk

<sup>e</sup> School of Chemistry and Chemical Engineering, Henan Normal University, Xinxiang 453007, P. R. China

<sup>f</sup> School of Chemistry and Chemical Engineering, Qufu Normal University, Qufu, 273165, P. R. China

## Computational details

The calculations were conducted in the framework of density functional theory (DFT) using the M06 functional<sup>1</sup> with the Gaussian 09 package.<sup>2</sup> The LANL2DZ basis set<sup>3</sup> was chosen for Ni, Ag, P and S atoms whereas the 6-31g(G) basis set was employed for other atoms. An extra polarization functional was added for all atoms with  $\xi_p(\text{H}) = 0.11$ ,  $\xi_d(\text{O}) = 0.8$ ,  $\xi_d(\text{N}) = 0.8$ ,  $\xi_f(\text{P}) = 0.387$ ,  $\xi_d(\text{C}) = 0.8$ ,  $\xi_d(\text{F}) = 0.8$ ,  $\xi_f(\text{S}) = 0.503$ ,  $\xi_f(\text{Ag}) = 1.611$  and  $\xi_f(\text{Ni}) = 3.130$ .<sup>4</sup> Frequency calculations at the same level of theory were carried out to identify all stationary points as energy minima or transition states. Intrinsic reaction coordinate (IRC) analyses<sup>5</sup> were performed to confirm the connection of each transition state indeed with its forward and backward minima. To further refine the calculated energies, single-point free energies were evaluated using the solvation model density (SMD)<sup>6</sup> with a larger combined basis set, in which the SDD<sup>7</sup> (ECP) basis set is used for Ni, Ag, P and S, and the 6-311++G(d, p) basis set for all the remaining atoms. Chlorobenzene was used as the solvent with the UAKS atomic radii, in accordance with the experimental conditions.

To confirm the reliability of the M06 functional with the basis sets for describing the present system, we have performed single-point energy calculations in chlorobenzene for the key stationary points, **IM5** and **TS5-6** in Fig.1, **IM7**, **TS7-8**, **IM12** and **TS12-13** in Fig.2 by using B3LYP-D3 and wB97X-D functionals, respectively. The calculated results are collected in Table S1. It can be seen that for the three steps, **IM5**  $\rightarrow$  **TS5-6**, **IM7**  $\rightarrow$  **TS7-8**, **IM12**  $\rightarrow$  **TS12-13**, all the functionals give comparable barriers and consistent trends, demonstrating that the employment of the M06-computed method is suitable for the present study.

## References

- 1 (a) Y. Zhao, N. E. Schultz and D. G. Truhlar, *J. Chem. Phys.*, 2005, **123**, 161103; (b) Y. Zhao and D. G. Truhlar, *Acc. Chem. Res.*, 2008, **41**, 157.
- 2 M. J. Frisch, G. W. Trucks, H. B. Schlegel, G. E. Scuseria, M. A. Robb, J. R. Cheeseman, G. Scalmani, V. Barone, B. Mennucci, G. A. Petersson, H. Nakatsuji, M. Caricato, X. Li, H. P. Hratchian, A. F. Izmaylov, J. Bloino, G. Zheng, J. L. Sonnenberg, M. Hada, M. Ehara, K. Toyota, R. Fukuda, J. Hasegawa, M. Ishida, T. Nakajima, Y. Honda, O. Kitao, H. Nakai, T. Vreven, J. A. Montgomery Jr, J. E. Peralta, F. Ogliaro, M. Bearpark, J. J. Heyd, E. Brothers, K. N. Kudin, V. N. Staroverov, R. Kobayashi, J. Normand, K. Raghavachari, A. Rendell, J. C. Burant, S. S. Iyengar, J. Tomasi, M. Cossi, N. Rega, J. M. Millam, M. Klene, J. E. Knox, J. B. Cross, V. Bakken, C. Adamo, J. Jaramillo, R. Gomperts, R. E. Stratmann, O. Yazyev, A. J. Austin, R. Cammi, C. Pomelli, J. W. Ochterski, R. L. Martin, K. Morokuma, V. G. Zakrzewski, G. A. Voth, P. Salvador, J. J. Dannenberg, S. Dapprich, A. D. Daniels, O. Farkas, J. B. Foresman, J. V. Ortiz, J. Cioslowski and D. J. Fox, Gaussian 09, revision D.01, Gaussian, Inc., Wallingford, CT, 2009.
- 3 P. C. Hariharan and J. A. Pople, *Theor. Chim. Acta.*, 1973, **28**, 213.
- 4 A. W. Ehlers, M. Bohme, S. Dapprich, A. Gobbi, A. Hollwarth, V. Jonas, K. F. Kohler, R. Stegmann, A. Veldkamp and G. Frenking, *Chem. Phys. Lett.*, 1993, **208**, 111.
- 5 (a) K. Fukui, *J. Phys. Chem.*, 1970, **74**, 4161; (b) K. Fukui, *Acc. Chem. Res.*, 1981, **14**, 363.
- 6 A. V. Marenich, C. J. Cramer and D. G. Truhlar, *J. Phys. Chem. B*, 2009, **113**, 6378.
- 7 P. Fuentealba, H. Stoll, L. Szentpaly, P. Schwerdtfeger and H. Preuss, *J. Phys. B Atom. Mol. Phys.*, 1983, **16**, L323.

**Table S1** Calculated free-energy barriers (kcal mol<sup>-1</sup>) using M06, B3LYP-D3 and wB97X-D functionals to refine energies of the critical steps involved in Figs. 1-2.

|          | <b>IM5→TS5-6</b> | <b>IM7→TS7-8</b> | <b>IM12→TS12-13</b> | <b>IM3→TS5-6</b> |
|----------|------------------|------------------|---------------------|------------------|
| M06      | 31.7             | 6.3              | 33.0                | 37.6             |
| B3LYP-D3 | 34.2             | 8.2              | 34.5                | 45.1             |
| wB97X-D  | 33.3             | 7.7              | 35.6                | 43.7             |

6-311++G(d, p) for C, H, O, N and F atoms, SDD+f for P, S, Ni and Ag.

**Table S2** Various structures resulting from the different coordination of Ni(OTf)<sub>2</sub> or AgOAc species. The relative free energies are given in kcal mol<sup>-1</sup>.

|                      |                    |                  |                  |
|----------------------|--------------------|------------------|------------------|
| Ni(OTf) <sub>2</sub> |                    |                  |                  |
| (0.0)                | <b>IM1</b> (-25.6) | <b>M</b> (-17.2) | <b>N</b> (-4.1)  |
|                      |                    |                  |                  |
| <b>Q</b> (-9.0)      | <b>S</b> (-25.2)   | <b>T</b> (-5.2)  | <b>W</b> (-15.2) |

**Scheme S1** The direct redox process from **IM3** and **IM5**, respectively. The relative free energies are given in kcal mol<sup>-1</sup>.

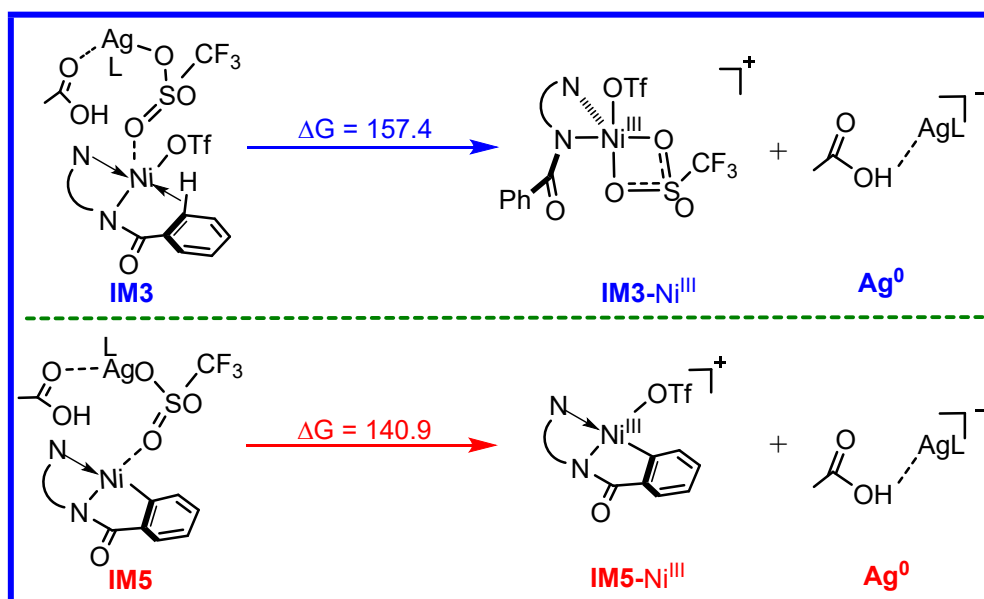

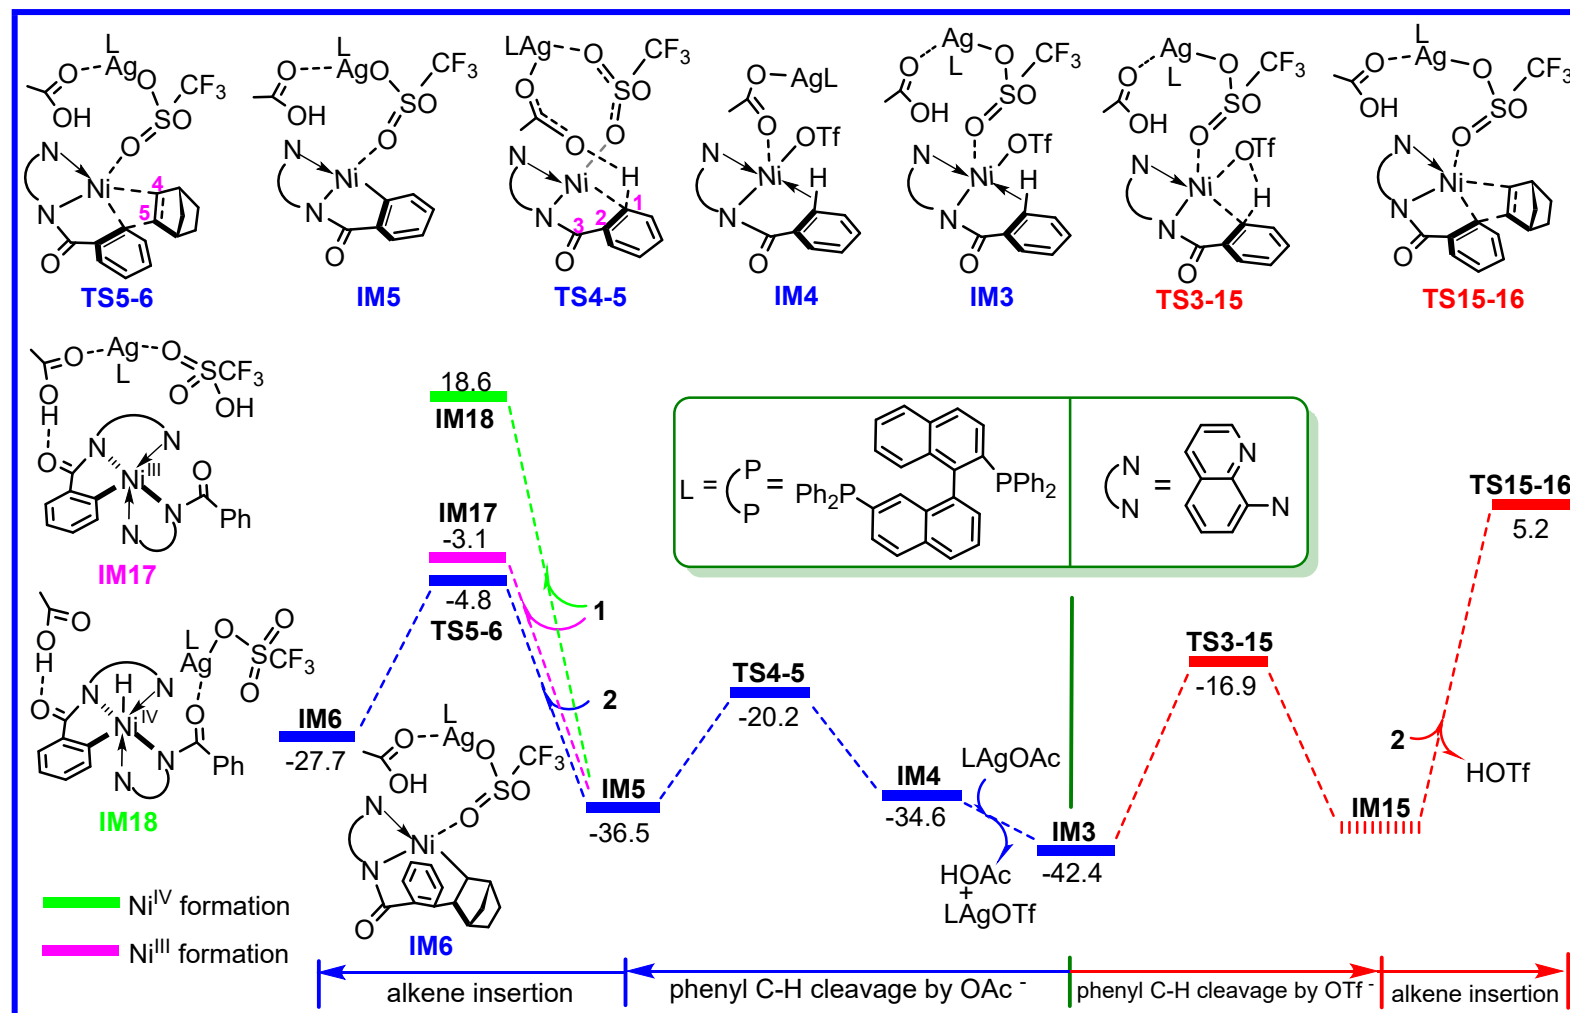

**Fig. S1** Gibbs free energy profiles in chlorobenzene solvent for the possible pathways from **IM3**. The free energies are given in kcal mol<sup>-1</sup>.

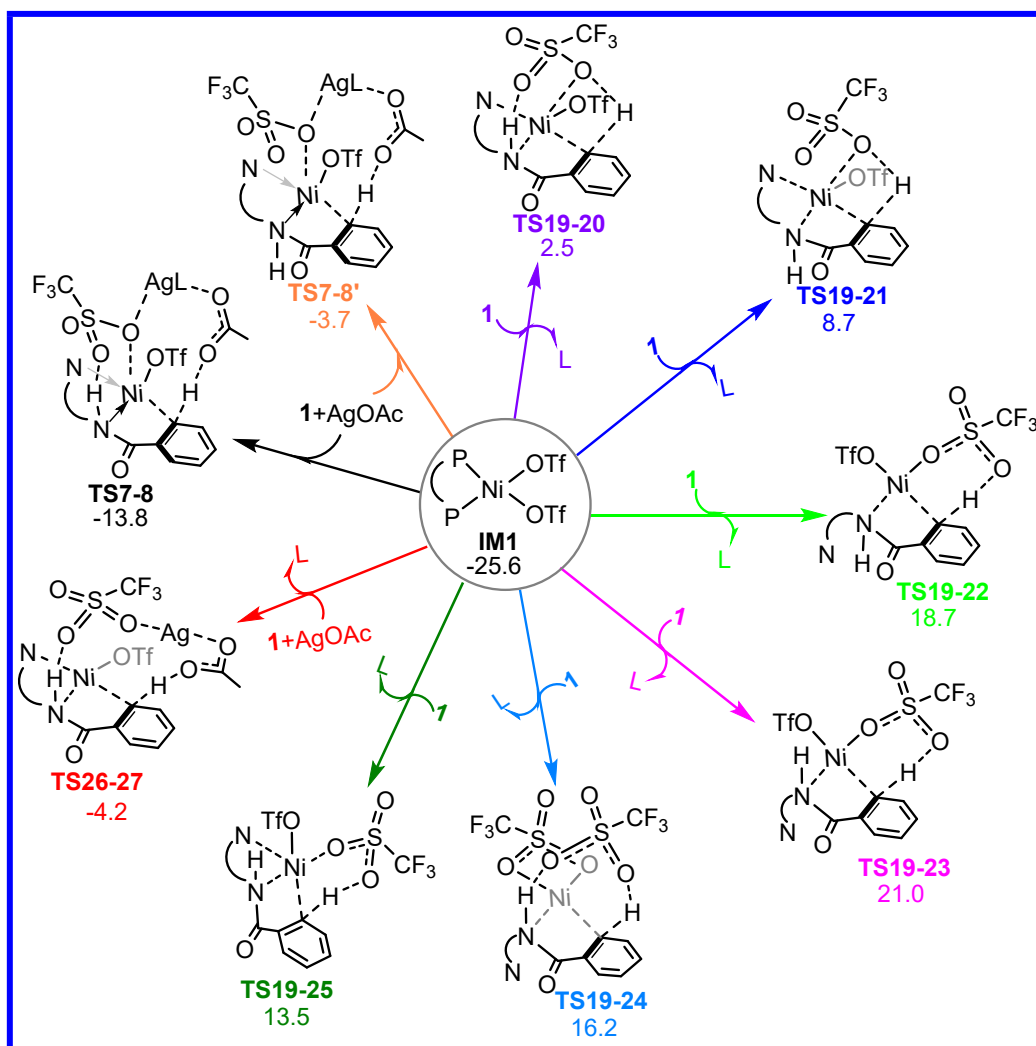

**Fig. S2** Schematic structures for the possible C-H activation transition states from **IM1**. The free energies are given in kcal mol<sup>-1</sup>.  $L = \text{P} \curvearrowright \text{P}$

Starting from **IM1**, the reaction undergoes a series of possible phenyl C-H activation transition states, including the involvement of LAgOAc (**TS7-8**, **TS7-8'**), AgOAc (**TS26-27**), no Ag salt (**TS19-20**, **TS19-21**, **TS19-22**, **TS19-23**, **TS19-24**, **TS19-25**), respectively. It is found that the LAgOAc-included TSs are more stable than those AgOAc- and no-Ag salt-included ones. These facts suggest that AgOAc and L ligand are important for promoting the reaction.



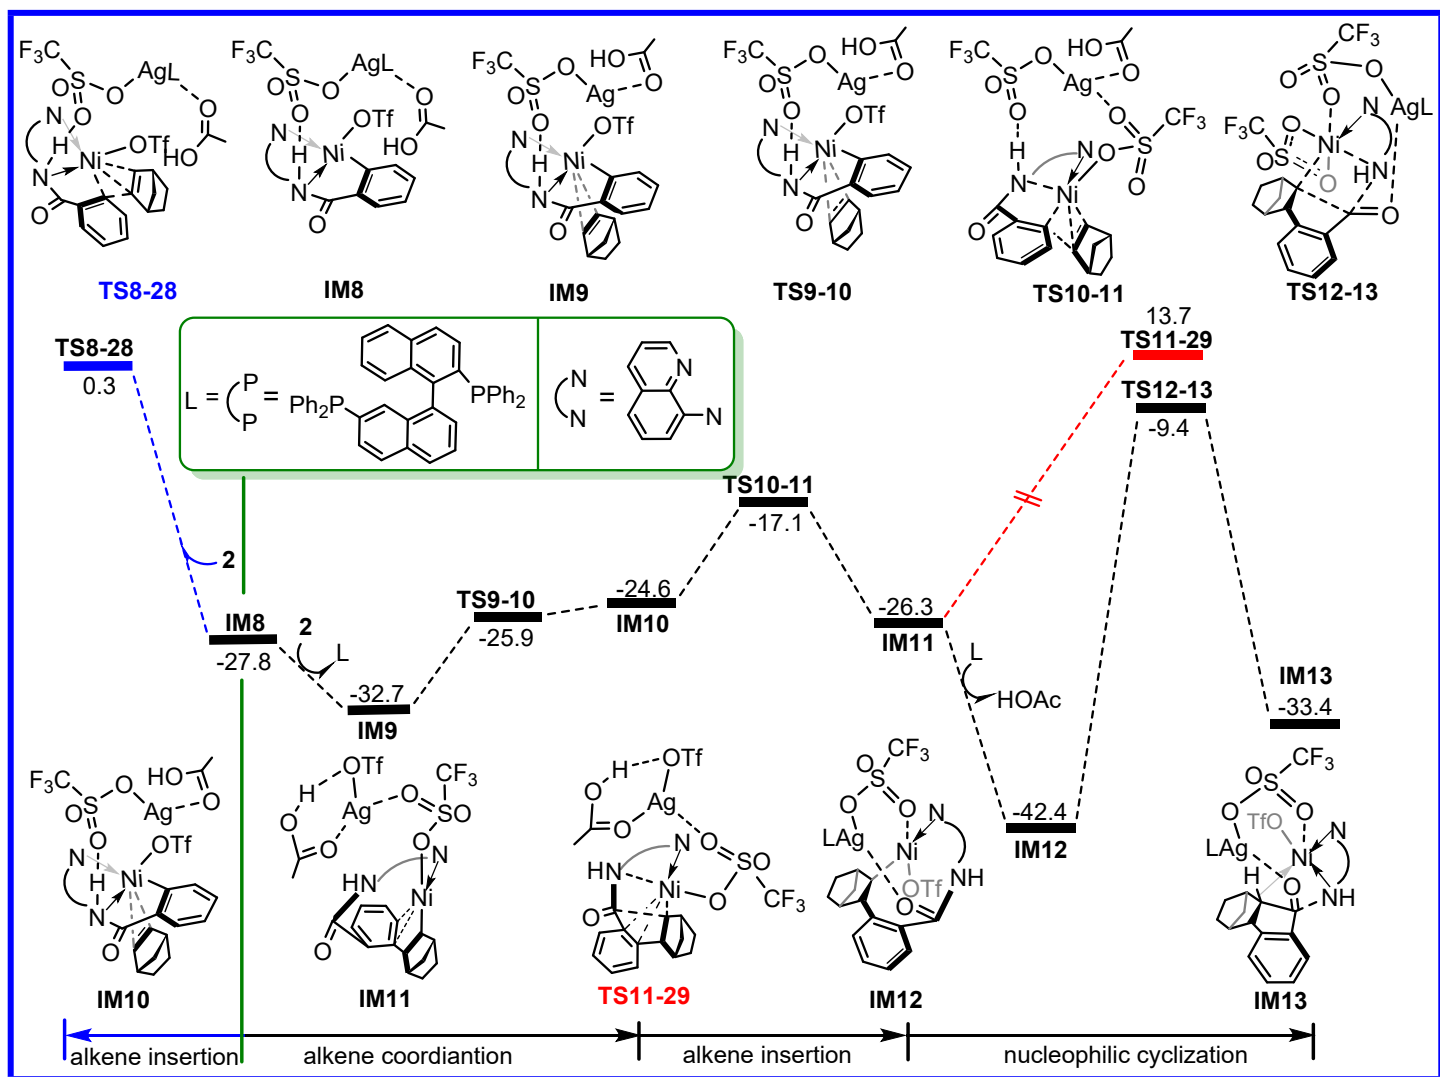

**Fig. S3** Gibbs free energy profiles in chlorobenzene solvent along the possible pathways from **IM8** with  $\text{LAgOAc}$  and  $\text{AgOAc}$ , respectively. The free energies are given in  $\text{kcal mol}^{-1}$ .

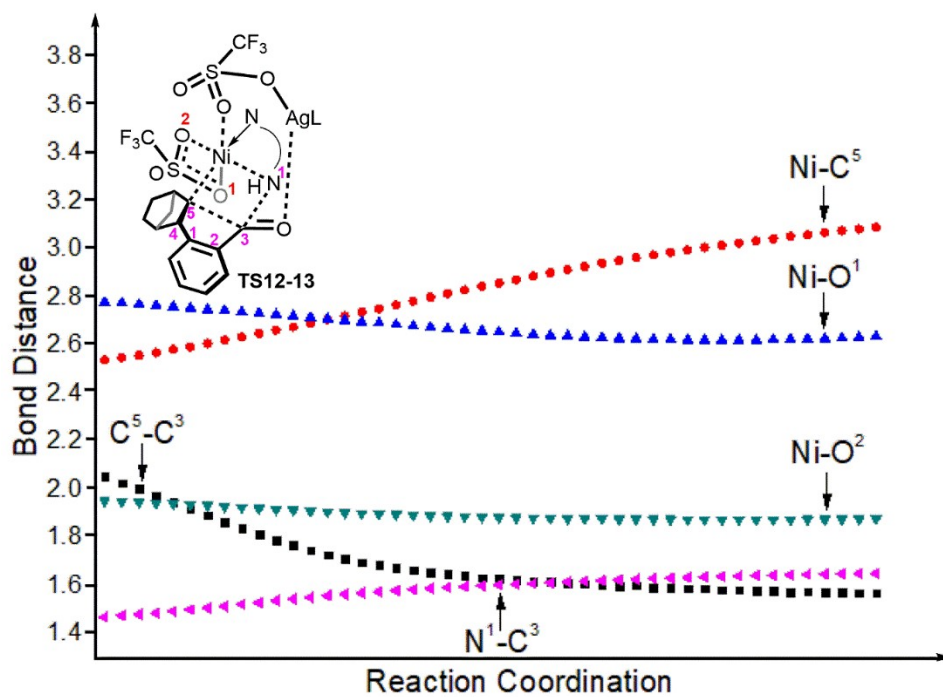

**Fig. S4** Diagram of the key bond length scans for the concerted transition state TS12-13 along the IRC pathway. The bond distances are given in Å.

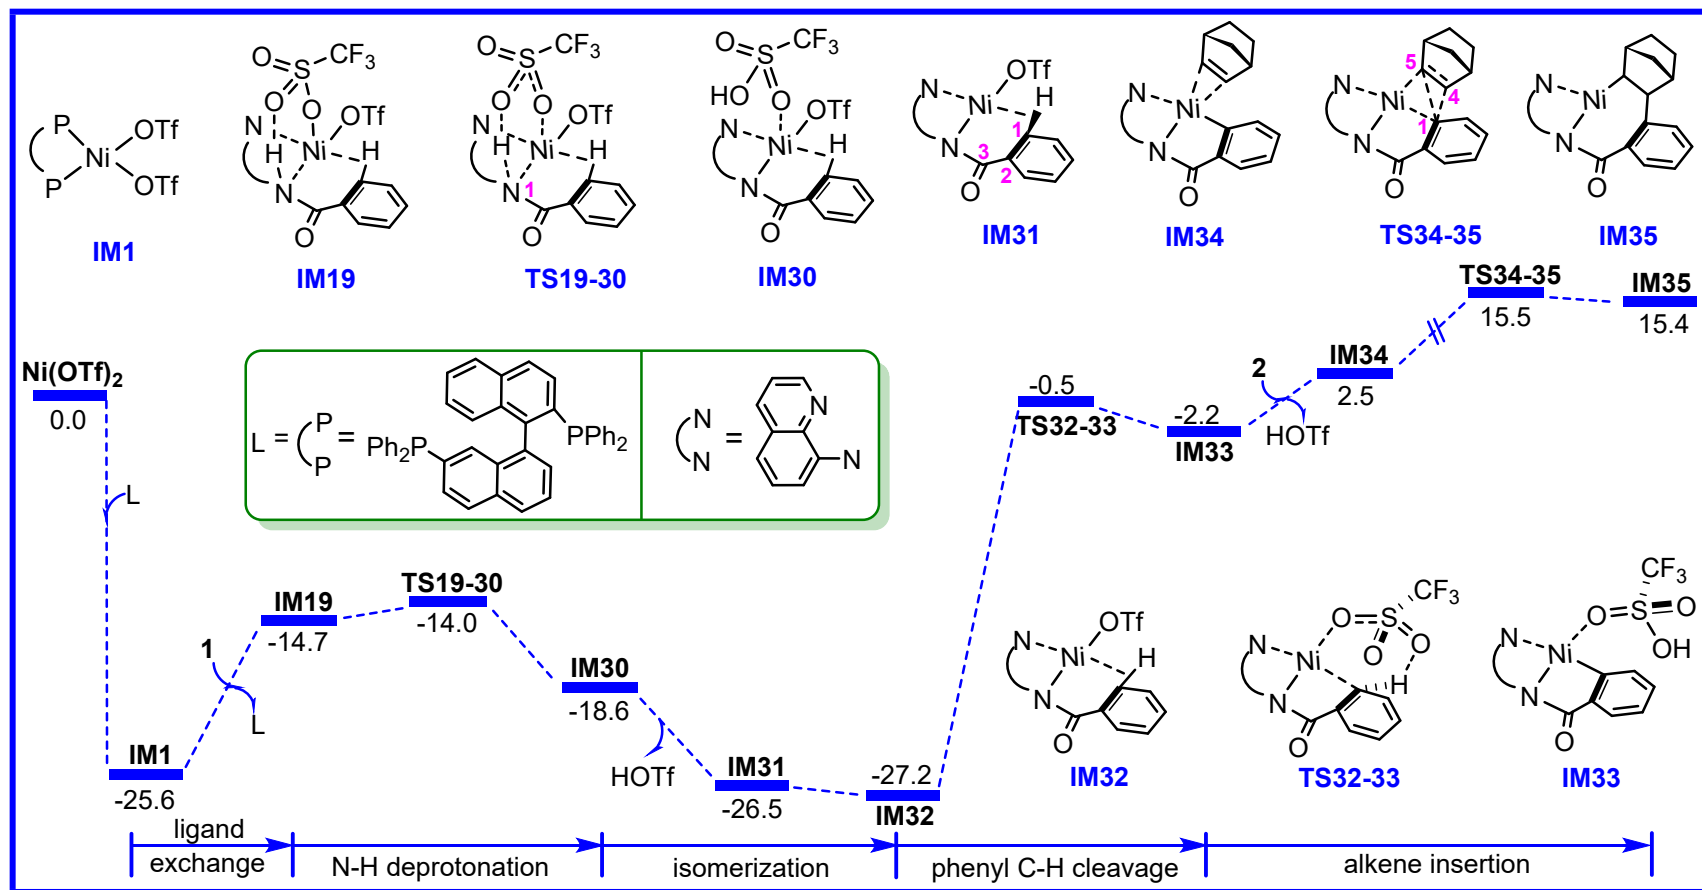

**Fig. S5** Gibbs free energy profile in chlorobenzene solvent leading to alkene insertion intermediate **IM35** from **IM1** without participation of AgOAc and L ligand according to the commonly reported route. The free energies are given in kcal mol<sup>-1</sup>.

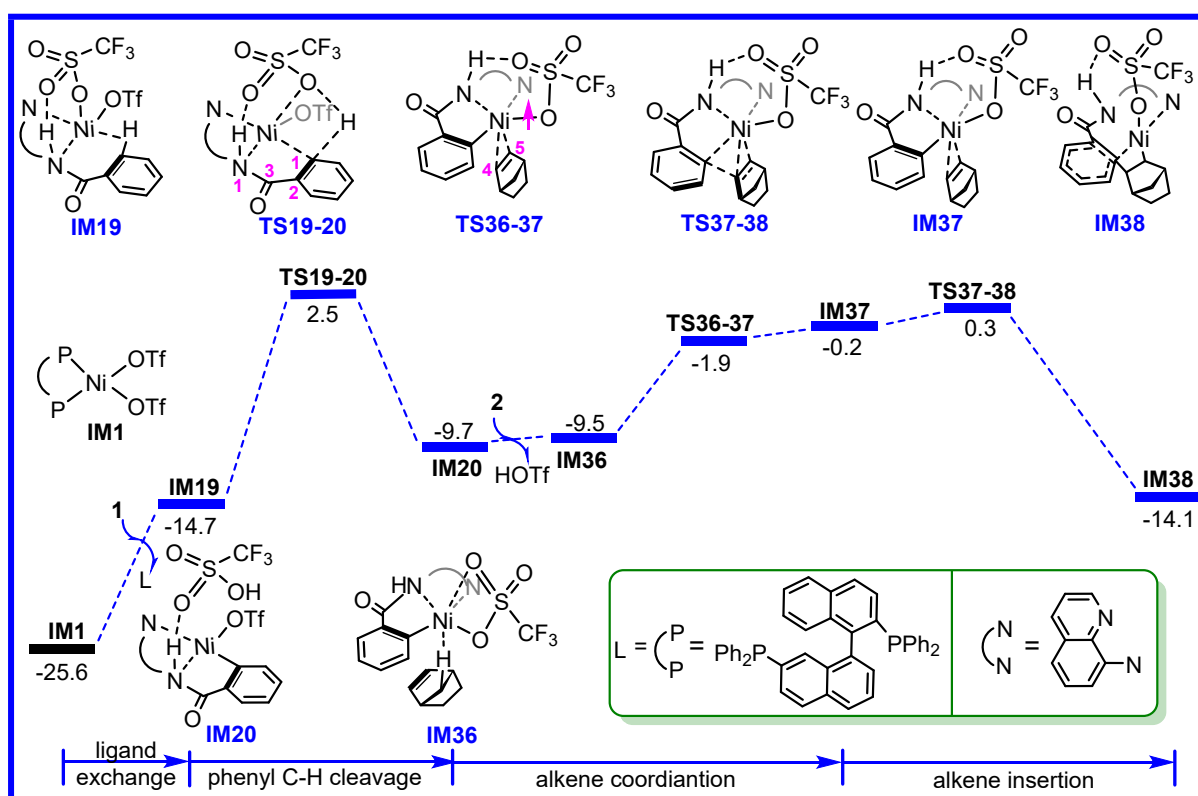

**Fig. S6** Gibbs free energy profiles in chlorobenzene solvent along other possible pathway leading to alkene insertion intermediate **IM38** from **IM1** without participation of AgOAc and L ligand. The free energies are given in kcal mol<sup>-1</sup>.

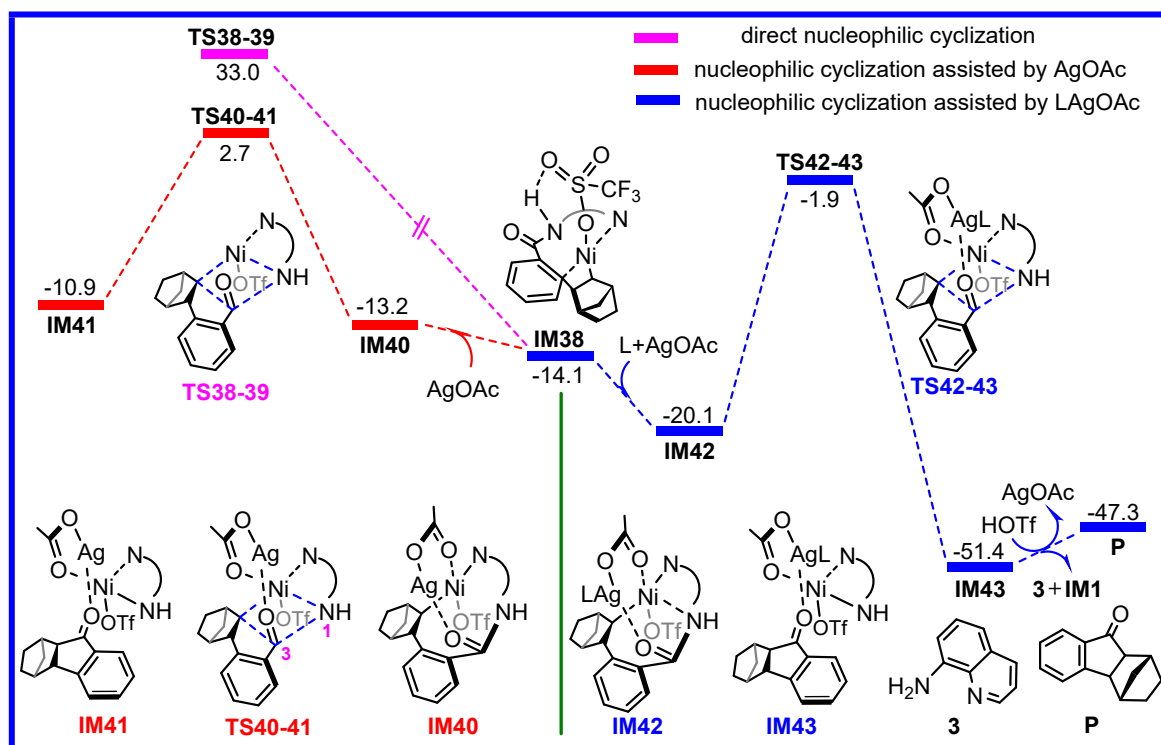

**Fig. S7** Gibbs free energy profiles in chlorobenzene solvent along the possible nucleophilic cyclization pathways from **IM38**. The free energies are given in kcal mol<sup>-1</sup>.

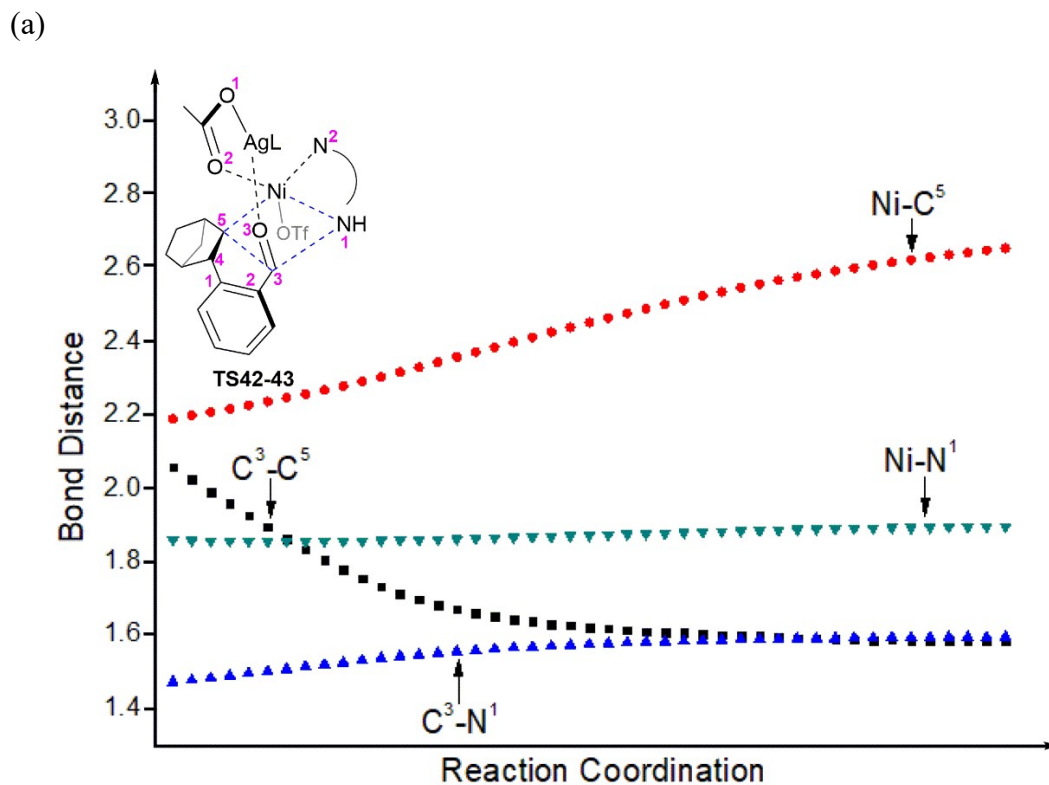

(b)

| Atoms          | NPA charges | Atoms          | NPA charges | Atoms          | NPA charges |
|----------------|-------------|----------------|-------------|----------------|-------------|
| C <sup>5</sup> | -0.402      | N <sup>2</sup> | -0.449      | C <sup>2</sup> | -0.083      |
| C <sup>3</sup> | 0.623       | C <sup>4</sup> | -0.253      | C <sup>1</sup> | -0.006      |
| Ni             | 0.497       | O <sup>1</sup> | -0.783      | Ag             | 0.641       |
| N <sup>1</sup> | -0.661      | O <sup>2</sup> | -0.659      | O <sup>3</sup> | -0.768      |

**Fig. S8** Diagram of the key bond length scans along the IRC pathway(a) and the calculated NPA charges of the key atoms (b) for **TS42-43**. The bond distances and the charges are given in Å and *e*, respectively.

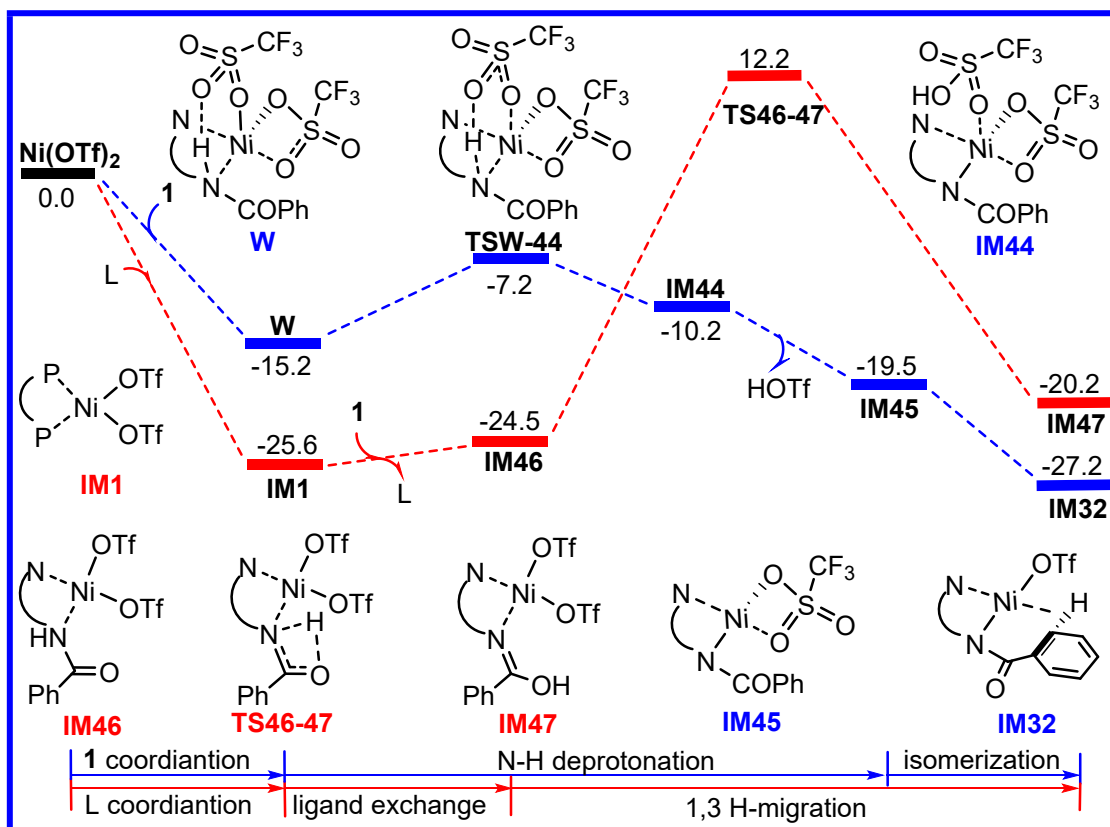

**Fig. S9** Gibbs free energy profile in chlorobenzene solvent along other possible pathways for the N-H deprotonation process from the starting materials without participation of AgOAc. The free energies are given in kcal mol<sup>-1</sup>.

**Table S3** Calculated Gibbs free energies in the gas-phase using M06 functional, single-point HF energies in chlorobenzene solvent using M06 functional, and imaginary frequencies for all structures in the present work. The relative energies and the imaginary frequencies are given in Hartree and  $\text{cm}^{-1}$ , respectively.

| Structure            | Gibbs Free Energy<br>(M06 gas-phase<br>optimized<br>calculation) | Solvation HF<br>Energy (M06 single-<br>point calculation) | Imaginary<br>Frequency |
|----------------------|------------------------------------------------------------------|-----------------------------------------------------------|------------------------|
| Ni(OTf) <sub>2</sub> | -1315.379155                                                     | -2093.4015886                                             |                        |
| <b>IM1</b>           | -3023.062200                                                     | -4471.220214                                              |                        |
| <b>IM2</b>           | -4198.378260                                                     | -5648.0582201                                             |                        |
| <b>TS2-3</b>         | -4198.377750                                                     | -5648.0542266                                             | -345.61                |
| <b>IM3</b>           | -4198.400925                                                     | -5648.083872                                              |                        |
| <b>IM4</b>           | -3624.771442                                                     | -4686.245708                                              |                        |
| <b>TS4-5</b>         | -3624.754360                                                     | -4686.218637                                              | -1495.83               |
| <b>IM5</b>           | -3624.798028                                                     | -4686.257028                                              |                        |
| <b>TS5-6</b>         | -3897.269692                                                     | -4958.811442                                              | -133.74                |
| <b>IM6</b>           | -3897.315028                                                     | -4958.85194                                               |                        |
| <b>IM7</b>           | -4198.369668                                                     | -5648.04975                                               |                        |
| <b>TS7-8</b>         | -4198.370137                                                     | -5648.039188                                              | -626.48                |
| <b>TS7-8'</b>        | -4198.348164                                                     | -5648.024563                                              | -722.06                |
| <b>IM8</b>           | -4198.405687                                                     | -5648.071137                                              |                        |
| <b>IM9</b>           | -2763.260235                                                     | -3542.901694                                              |                        |
| <b>TS9-10</b>        | -2763.249501                                                     | -3542.890643                                              | -23.62                 |
| <b>IM10</b>          | -2763.249511                                                     | -3542.888957                                              |                        |
| <b>TS10-11</b>       | -2763.249335                                                     | -3542.880626                                              | -145.18                |
| <b>IM11</b>          | -2763.276542                                                     | -3542.902879                                              |                        |
| <b>IM12</b>          | -4241.971132                                                     | -5691.629237                                              |                        |
| <b>TS12-13</b>       | -4241.896686                                                     | -5691.574066                                              | -227.39                |
| <b>IM13</b>          | -4241.937165                                                     | -5691.611082                                              |                        |
| <b>TS13-14</b>       | -4241.936556                                                     | -5691.609856                                              | -142.46                |
| <b>IM14</b>          | -4241.987888                                                     | -5691.6588846                                             |                        |
| <b>TS3-15</b>        | -4198.371865                                                     | -5648.041896                                              | -971.65                |
| <b>TS15-16</b>       | -3897.170395                                                     | -4958.722348                                              | -341.18                |
| <b>IM17</b>          | -4425.856679                                                     | -5487.554589                                              |                        |
| <b>IM18</b>          | -4425.804375                                                     | -5487.513252                                              |                        |
| <b>IM19</b>          | -2116.5025101                                                    | -2894.784158                                              |                        |
| <b>TS19-20</b>       | -2116.481377                                                     | -2894.753324                                              | -1420.25               |
| <b>IM20</b>          | -2116.507431                                                     | -2894.777457                                              |                        |
| <b>TS19-21</b>       | -2116.461270                                                     | -2894.74258                                               | -1418.03               |
| <b>TS19-22</b>       | -2116.453115                                                     | -2894.736361                                              | -1322.09               |
| <b>TS19-23</b>       | -2116.459557                                                     | -2894.728555                                              | -1439.71               |
| <b>TS19-24</b>       | -2116.453869                                                     | -2894.72534                                               | -1298.75               |
| <b>TS19-25</b>       | -2116.445532                                                     | -2894.723446                                              | -1366.49               |



|                |               |              |          |
|----------------|---------------|--------------|----------|
| <b>TS26-27</b> | -2490.686247  | -3270.247362 | -1580.32 |
| <b>TS8-28</b>  | -4470.879227  | -5920.62809  | -201.68  |
| <b>TS11-29</b> | -2763.193008  | -3542.831075 | -338.23  |
| <b>P</b>       | -616.691021   | -616.8810902 |          |
| <b>M</b>       | -2081.827446  | -2753.247417 |          |
| <b>N</b>       | -1587.908111  | -2366.022244 |          |
| <b>Q</b>       | -646.689458   | -648.0814653 |          |
| <b>S</b>       | -2116.518899  | -2894.803326 |          |
| <b>T</b>       | -1175.273521  | -1176.819869 |          |
| <b>W</b>       | -2116.511059  | -2894.787691 |          |
| <b>TS19-30</b> | -2116.5015174 | -2894.779914 | -756.80  |
| <b>IM30</b>    | -2116.5116529 | -2894.789595 |          |
| <b>IM31</b>    | -1542.8997612 | -1932.980766 |          |
| <b>IM32</b>    | -1542.899078  | -1932.980793 |          |
| <b>TS32-33</b> | -1542.867015  | -1932.934426 | -763.44  |
| <b>IM33</b>    | -1542.873121  | -1932.731648 |          |
| <b>IM34</b>    | -1241.765601  | -1243.72342  |          |
| <b>TS34-35</b> | -1241.747504  | -1243.703915 | -130.85  |
| <b>IM35</b>    | -1241.748324  | -1243.703881 |          |
| <b>IM36</b>    | -1815.401192  | -2205.565054 |          |
| <b>TS36-37</b> | -1815.395584  | -2205.552251 | -39.71   |
| <b>IM37</b>    | -1815.397821  | -2205.551267 |          |
| <b>TS37-38</b> | -1815.394935  | -2205.549086 | -166.16  |
| <b>IM38</b>    | -1815.425414  | -2205.576878 |          |
| <b>TS38-39</b> | -1815.335192  | -2205.49881  | -371.15  |
| <b>IM40</b>    | -2189.629057  | -2581.06098  |          |
| <b>TS40-41</b> | -2189.580679  | -2581.032372 | -200.72  |
| <b>IM41</b>    | -2189.601029  | -2581.055215 |          |
| <b>IM42</b>    | -3897.292401  | -4958.843843 |          |
| <b>TS42-43</b> | -3897.261071  | -4958.811788 | -222.31  |
| <b>IM43</b>    | -3897.338214  | -4958.889704 |          |
| <b>TSW-44</b>  | -2116.503840  | -2894.770915 | -50.81   |
| <b>IM44</b>    | -2116.511255  | -2894.778233 |          |
| <b>IM45</b>    | -1542.897792  | -1932.965359 |          |
| <b>IM46</b>    | -2116.518882  | -2894.803351 |          |
| <b>TS46-47</b> | -2116.460268  | -2894.74172  | -1795.91 |
| <b>IM47</b>    | -2116.524536  | -2894.797266 |          |

**Table S4** Calculated Gibbs free energies in the gas-phase using M06 functional, single-point HF energies in chlorobenzene solvent using B3LYP-D3 and wB97X-D functionals for the structures in Table S1. The relative energies are given in Hartree.

| Structure      | B3LYP-D3      | wB97X-D      |
|----------------|---------------|--------------|
| <b>IM5</b>     | -4688.7841585 | -4687.439577 |
| <b>TS5-6</b>   | -4961.568822  | -4960.128304 |
| <b>IM7</b>     | -5650.849102  | -5649.300514 |
| <b>TS7-8</b>   | -5650.835505  | -5649.28784  |
| <b>IM12</b>    | -5694.520924  | -5692.910025 |
| <b>TS12-13</b> | -5694.463908  | -5692.965293 |

Cartesian coordinates for all the stationary points involved in the reaction.

**Ni(OTf)<sub>2</sub>**

|    |             |             |             |
|----|-------------|-------------|-------------|
| S  | -2.37146300 | -0.86546500 | -0.00052700 |
| O  | -1.35741500 | -0.55487300 | 1.19222300  |
| O  | -3.18767200 | -2.12411300 | 0.00475500  |
| C  | -3.58817000 | 0.62276700  | 0.00058900  |
| O  | -1.35866100 | -0.56300900 | -1.19584200 |
| S  | 2.37131500  | 0.86537400  | -0.00051700 |
| O  | 1.35874800  | 0.56225500  | -1.19586600 |
| O  | 3.18713500  | 2.12425800  | 0.00448700  |
| C  | 3.58834800  | -0.62249700 | 0.00068200  |
| O  | 1.35730800  | 0.55496800  | 1.19222600  |
| Ni | -0.00003700 | -0.00018600 | -0.00321100 |
| F  | 4.27921400  | -0.55994500 | 1.11004700  |
| F  | 4.36068200  | -0.49795500 | -1.04831100 |
| F  | 2.87979300  | -1.72136300 | -0.05704500 |
| F  | -4.27848600 | 0.56068300  | 1.11030100  |
| F  | -2.87939100 | 1.72143700  | -0.05779000 |
| F  | -4.36105600 | 0.49815900  | -1.04796500 |

**IM1**

|    |             |             |             |
|----|-------------|-------------|-------------|
| S  | -2.37146300 | -0.86546500 | -0.00052700 |
| O  | -1.35741500 | -0.55487300 | 1.19222300  |
| O  | -3.18767200 | -2.12411300 | 0.00475500  |
| C  | -3.58817000 | 0.62276700  | 0.00058900  |
| O  | -1.35866100 | -0.56300900 | -1.19584200 |
| S  | 2.37131500  | 0.86537400  | -0.00051700 |
| O  | 1.35874800  | 0.56225500  | -1.19586600 |
| O  | 3.18713500  | 2.12425800  | 0.00448700  |
| C  | 3.58834800  | -0.62249700 | 0.00068200  |
| O  | 1.35730800  | 0.55496800  | 1.19222600  |
| Ni | -0.00003700 | -0.00018600 | -0.00321100 |
| F  | 4.27921400  | -0.55994500 | 1.11004700  |
| F  | 4.36068200  | -0.49795500 | -1.04831100 |
| F  | 2.87979300  | -1.72136300 | -0.05704500 |
| F  | -4.27848600 | 0.56068300  | 1.11030100  |
| F  | -2.87939100 | 1.72143700  | -0.05779000 |
| F  | -4.36105600 | 0.49815900  | -1.04796500 |

**IM2**

|   |             |            |             |
|---|-------------|------------|-------------|
| S | -6.86955500 | 1.02368400 | 0.49406800  |
| O | -5.40265900 | 1.34759900 | -0.06614400 |
| O | -7.96503600 | 1.43708600 | -0.46932200 |
| C | -6.96962200 | 2.27666600 | 1.93146000  |

|    |             |             |             |
|----|-------------|-------------|-------------|
| O  | -6.89596900 | -0.35381800 | 1.15216100  |
| Ni | -4.32326200 | -0.18196900 | -0.16877700 |
| F  | -8.20822500 | 2.31005800  | 2.37400500  |
| F  | -6.60451200 | 3.46351300  | 1.49812800  |
| F  | -6.15939300 | 1.88130300  | 2.89922000  |
| C  | -5.92599900 | -0.21290600 | -2.81999200 |
| C  | -5.42176000 | -2.09478400 | -1.36621200 |
| C  | -6.77715300 | -2.42566100 | -1.31393400 |
| C  | -7.68952000 | -1.65198500 | -2.01188400 |
| C  | -7.27061400 | -0.53421100 | -2.74349200 |
| H  | -5.58503800 | 0.64818600  | -3.39036200 |
| H  | -7.09310500 | -3.25314600 | -0.68285500 |
| H  | -8.75026100 | -1.88615500 | -1.95254400 |
| H  | -8.00961900 | 0.09525100  | -3.23266100 |
| C  | -4.47633800 | -2.77258400 | -0.45409300 |
| O  | -4.61974200 | -3.83785200 | 0.08336700  |
| N  | -3.38978200 | -1.85179200 | -0.15163700 |
| H  | -2.66311000 | -1.83549200 | -0.95899200 |
| C  | -2.67913400 | -2.03576000 | 1.07867200  |
| C  | -2.64794500 | -0.88575700 | 1.88209100  |
| C  | -1.99364800 | -3.16679700 | 1.44117800  |
| C  | -1.84876800 | -0.84623000 | 3.04343800  |
| C  | -1.24641000 | -3.15545400 | 2.63847100  |
| H  | -2.02309300 | -4.04906700 | 0.80589600  |
| C  | -3.31829100 | 1.32605400  | 2.12658400  |
| C  | -1.79039800 | 0.38725800  | 3.73356600  |
| C  | -1.16000000 | -2.02397800 | 3.41519300  |
| H  | -0.70225900 | -4.05195300 | 2.92954400  |
| C  | -2.50683000 | 1.46297000  | 3.27250500  |
| H  | -3.88441000 | 2.15946000  | 1.71809500  |
| H  | -1.16381800 | 0.46724700  | 4.62212100  |
| H  | -0.54219600 | -2.01613900 | 4.31358400  |
| H  | -2.46265700 | 2.42780200  | 3.76958000  |
| N  | -3.39242600 | 0.18465400  | 1.47013200  |
| C  | -4.98152700 | -0.99345300 | -2.14026200 |
| S  | -1.88107200 | 1.94227700  | -0.88976100 |
| O  | -0.71551800 | 1.31154200  | -0.08364200 |
| O  | -2.78997500 | 0.90635400  | -1.58698100 |
| C  | -1.08477300 | 2.84294000  | -2.37198900 |
| O  | -2.57635300 | 3.06143600  | -0.11883800 |
| H  | -3.92149700 | -0.85128500 | -2.36171400 |
| F  | -0.61186300 | 1.96979700  | -3.23579800 |
| F  | -0.11236900 | 3.62422300  | -1.93684300 |
| F  | -2.02093200 | 3.57372500  | -2.94549500 |

|    |             |             |             |
|----|-------------|-------------|-------------|
| C  | -1.47103900 | -1.33989500 | -4.26118200 |
| H  | -0.60301100 | -1.38495500 | -4.92844900 |
| H  | -1.94969200 | -0.36390800 | -4.42006600 |
| H  | -2.18212900 | -2.13453400 | -4.50852900 |
| C  | -1.02012800 | -1.41613800 | -2.81714700 |
| O  | -1.65820300 | -2.18593700 | -2.03649100 |
| O  | -0.04533400 | -0.69326300 | -2.51024400 |
| Ag | 0.70849700  | -0.50182400 | -0.39358100 |
| C  | 3.42837800  | 1.29853700  | -0.73143600 |
| C  | 3.77940000  | 0.00413400  | -1.10085700 |
| C  | 3.41422800  | -0.51087300 | -2.38091400 |
| C  | 2.70904400  | 0.32897300  | -3.29026800 |
| C  | 2.38533400  | 1.64635300  | -2.89581800 |
| C  | 2.71676400  | 2.11169400  | -1.65061000 |
| H  | 4.25062600  | -2.49204800 | -2.08717800 |
| C  | 3.71114700  | -1.84101200 | -2.77520600 |
| C  | 2.32108500  | -0.18452400 | -4.54937100 |
| H  | 1.83805500  | 2.28126900  | -3.59120200 |
| H  | 2.41721600  | 3.11433100  | -1.34908300 |
| C  | 2.61497900  | -1.47661000 | -4.90051200 |
| C  | 3.31359700  | -2.31223300 | -4.00111500 |
| H  | 1.75959200  | 0.46522400  | -5.22186300 |
| H  | 2.30364300  | -1.86634800 | -5.86859600 |
| H  | 3.54075600  | -3.33874600 | -4.28440500 |
| C  | 8.84885100  | -0.40064000 | -0.44992700 |
| C  | 8.29969000  | -1.18493800 | 0.53168000  |
| C  | 6.89677900  | -1.34549800 | 0.62841000  |
| C  | 6.04872000  | -0.68257400 | -0.30530200 |
| C  | 8.01371100  | 0.25455400  | -1.37988200 |
| H  | 6.96180200  | -2.62151400 | 2.37302400  |
| H  | 9.92907100  | -0.28133000 | -0.51589600 |
| H  | 8.93275700  | -1.69876100 | 1.25555700  |
| C  | 6.31188700  | -2.13394400 | 1.64588900  |
| C  | 4.62736700  | -0.81662400 | -0.19003200 |
| H  | 8.45412000  | 0.87970100  | -2.15461300 |
| C  | 4.09473200  | -1.64114200 | 0.78880200  |
| C  | 4.95407000  | -2.28059500 | 1.72128500  |
| H  | 4.52334400  | -2.87722100 | 2.52486700  |
| P  | 3.90456900  | 1.90505300  | 0.97844800  |
| P  | 2.26817200  | -1.91192000 | 0.92215600  |
| C  | 6.65051500  | 0.11581000  | -1.31244200 |
| H  | 6.01536600  | 0.62898400  | -2.03267100 |
| C  | 2.01296900  | -3.61430600 | 0.24962700  |
| C  | 0.80186400  | -3.86428800 | -0.40521900 |

|   |             |             |             |
|---|-------------|-------------|-------------|
| C | 2.97948700  | -4.62499700 | 0.30248800  |
| C | 0.55475800  | -5.10437700 | -0.98509300 |
| H | 0.04085400  | -3.08566400 | -0.50018900 |
| C | 2.72882900  | -5.86454900 | -0.27711500 |
| H | 3.94291500  | -4.43891100 | 0.77837300  |
| C | 1.51705200  | -6.10633700 | -0.92044100 |
| H | -0.38904000 | -5.26604800 | -1.50477200 |
| H | 3.48960500  | -6.64240800 | -0.23457300 |
| H | 1.33126500  | -7.07475200 | -1.38248500 |
| C | 2.09120400  | -2.06243100 | 2.75482300  |
| C | 2.09938700  | -0.87242100 | 3.48993100  |
| C | 1.99007100  | -3.28255300 | 3.42526600  |
| C | 2.01296500  | -0.90493700 | 4.87751000  |
| H | 2.18759300  | 0.08547500  | 2.97230500  |
| C | 1.89497600  | -3.31226500 | 4.81489700  |
| H | 1.98275900  | -4.21519000 | 2.85877800  |
| C | 1.90742000  | -2.12540000 | 5.54255900  |
| H | 2.03143800  | 0.02650100  | 5.44157200  |
| H | 1.81567700  | -4.26841800 | 5.33031700  |
| H | 1.83890000  | -2.15161300 | 6.62882100  |
| C | 2.78689200  | 3.37356400  | 1.14311300  |
| C | 1.40958800  | 3.12063400  | 1.16921300  |
| C | 3.23320200  | 4.68618600  | 1.31127800  |
| C | 0.49417600  | 4.15801100  | 1.29890900  |
| H | 1.02469900  | 2.10715100  | 1.04150200  |
| C | 2.31731600  | 5.72315800  | 1.47629700  |
| H | 4.30047500  | 4.90593700  | 1.30647000  |
| C | 0.95066800  | 5.46501200  | 1.45782000  |
| H | -0.57345900 | 3.93727900  | 1.25449700  |
| H | 2.67921400  | 6.74268100  | 1.60475800  |
| H | 0.23847700  | 6.28206200  | 1.56362000  |
| C | 5.54836300  | 2.68105500  | 0.59142900  |
| C | 6.62739300  | 2.35960100  | 1.41723700  |
| C | 5.76496100  | 3.51894500  | -0.50914000 |
| C | 7.89973900  | 2.85901300  | 1.15062400  |
| H | 6.46959100  | 1.69077200  | 2.26491800  |
| C | 7.03144700  | 4.02737900  | -0.77038100 |
| H | 4.93306200  | 3.77171500  | -1.16785800 |
| C | 8.10173500  | 3.69644700  | 0.05914700  |
| H | 8.73489900  | 2.58889400  | 1.79537700  |
| H | 7.18675700  | 4.68225900  | -1.62673400 |
| H | 9.09512700  | 4.09145800  | -0.14928900 |

TS2-3

|    |             |             |             |
|----|-------------|-------------|-------------|
| S  | -6.84722400 | 0.94748000  | 0.47172700  |
| O  | -5.38507600 | 1.29493700  | -0.08076900 |
| O  | -7.94966200 | 1.37192800  | -0.47881600 |
| C  | -6.96198800 | 2.16701200  | 1.93520200  |
| O  | -6.86199900 | -0.44357500 | 1.10119600  |
| Ni | -4.28088700 | -0.22404500 | -0.18718600 |
| F  | -8.19591000 | 2.16014400  | 2.39198400  |
| F  | -6.63184500 | 3.37250500  | 1.52423500  |
| F  | -6.13100900 | 1.77321000  | 2.88637400  |
| C  | -5.96689100 | -0.28642100 | -2.75229800 |
| C  | -5.32936300 | -2.17797900 | -1.36346900 |
| C  | -6.66292200 | -2.58199100 | -1.29443600 |
| C  | -7.63128800 | -1.83932600 | -1.95083100 |
| C  | -7.29118500 | -0.67938600 | -2.65642000 |
| H  | -5.68482200 | 0.60853100  | -3.30289800 |
| H  | -6.92129400 | -3.44347100 | -0.68286800 |
| H  | -8.67610600 | -2.13387000 | -1.87706800 |
| H  | -8.07264300 | -0.07657700 | -3.11184200 |
| C  | -4.33349900 | -2.82776500 | -0.48060400 |
| O  | -4.41608000 | -3.92308500 | 0.01191400  |
| N  | -3.29980200 | -1.86506300 | -0.16307300 |
| H  | -2.54719700 | -1.84333200 | -1.02208200 |
| C  | -2.59989900 | -2.02341700 | 1.07424500  |
| C  | -2.57844300 | -0.85636600 | 1.85681400  |
| C  | -1.93919100 | -3.15242200 | 1.49150200  |
| C  | -1.80256000 | -0.78885500 | 3.03273200  |
| C  | -1.22813400 | -3.11608800 | 2.71062200  |
| H  | -1.96904200 | -4.05649700 | 0.88889000  |
| C  | -3.29240000 | 1.34625400  | 2.06401900  |
| C  | -1.75726100 | 0.46137300  | 3.69336200  |
| C  | -1.14008700 | -1.96415500 | 3.45638900  |
| H  | -0.71484800 | -4.01529300 | 3.04623700  |
| C  | -2.48281200 | 1.51988100  | 3.20579400  |
| H  | -3.88885300 | 2.15332300  | 1.64548000  |
| H  | -1.14043900 | 0.56632300  | 4.58612700  |
| H  | -0.54988200 | -1.94117000 | 4.37271700  |
| H  | -2.45482100 | 2.49455900  | 3.68471300  |
| N  | -3.33805900 | 0.19396500  | 1.42464900  |
| C  | -4.96602900 | -1.03403800 | -2.11626700 |
| S  | -1.87721100 | 1.99978600  | -0.91284900 |
| O  | -0.73300800 | 1.38294800  | -0.05996600 |
| O  | -2.77247200 | 0.95433800  | -1.60845500 |
| C  | -1.01417100 | 2.83983000  | -2.39236000 |
| O  | -2.56995800 | 3.14773700  | -0.18511100 |

|    |             |             |             |
|----|-------------|-------------|-------------|
| H  | -3.91963900 | -0.84582800 | -2.36910200 |
| F  | -0.54563200 | 1.92484200  | -3.21777300 |
| F  | -0.02870100 | 3.60022900  | -1.94942500 |
| F  | -1.90592900 | 3.58409000  | -3.01601800 |
| C  | -1.41434000 | -1.12588600 | -4.29649000 |
| H  | -0.52103000 | -0.89255600 | -4.88514800 |
| H  | -2.08389100 | -0.25480700 | -4.33925200 |
| H  | -1.94464100 | -1.98602600 | -4.71765800 |
| C  | -1.06027800 | -1.35403900 | -2.84489400 |
| O  | -1.84738000 | -2.11750200 | -2.19046700 |
| O  | -0.04845900 | -0.77726000 | -2.40239700 |
| Ag | 0.68429200  | -0.40211500 | -0.27497300 |
| C  | 3.39887500  | 1.31929400  | -0.73129200 |
| C  | 3.73886700  | 0.01948800  | -1.09593300 |
| C  | 3.37798200  | -0.49403600 | -2.37784000 |
| C  | 2.70734100  | 0.35836300  | -3.30094000 |
| C  | 2.42020100  | 1.68762100  | -2.92124000 |
| C  | 2.72555200  | 2.14630100  | -1.66685000 |
| H  | 4.16037400  | -2.49389500 | -2.06536800 |
| C  | 3.64472600  | -1.83310900 | -2.76221100 |
| C  | 2.32528400  | -0.15001000 | -4.56359300 |
| H  | 1.91536600  | 2.33805400  | -3.63425600 |
| H  | 2.44379500  | 3.15923900  | -1.38182800 |
| C  | 2.58374900  | -1.45312600 | -4.90232400 |
| C  | 3.24724200  | -2.30187400 | -3.98939600 |
| H  | 1.80083800  | 0.51465000  | -5.25165400 |
| H  | 2.27454500  | -1.83950100 | -5.87234800 |
| H  | 3.44878500  | -3.33602900 | -4.26396000 |
| C  | 8.81155000  | -0.41991300 | -0.50918400 |
| C  | 8.27037100  | -1.21642100 | 0.46714700  |
| C  | 6.86801400  | -1.36332200 | 0.58486600  |
| C  | 6.01082500  | -0.67643600 | -0.32286100 |
| C  | 7.96756600  | 0.26160700  | -1.41129600 |
| H  | 6.95119200  | -2.66610000 | 2.30848300  |
| H  | 9.89173500  | -0.31068800 | -0.59118600 |
| H  | 8.90972900  | -1.74954300 | 1.17132200  |
| C  | 6.29356900  | -2.16039800 | 1.60086400  |
| C  | 4.59037200  | -0.80347500 | -0.18898400 |
| H  | 8.40129300  | 0.89834400  | -2.18042500 |
| C  | 4.06769200  | -1.63186800 | 0.79183300  |
| C  | 4.93579200  | -2.29050700 | 1.70189800  |
| H  | 4.51427300  | -2.88910800 | 2.50883800  |
| P  | 3.85012100  | 1.91264500  | 0.98974300  |
| P  | 2.24114300  | -1.88300000 | 0.95337900  |



|   |             |             |             |
|---|-------------|-------------|-------------|
| C | 6.60406300  | 0.13603900  | -1.32286700 |
| H | 5.96315900  | 0.67170100  | -2.02136200 |
| C | 1.94904200  | -3.56444400 | 0.24789300  |
| C | 0.76143700  | -3.75932100 | -0.46507400 |
| C | 2.86793700  | -4.61665100 | 0.33823300  |
| C | 0.48428800  | -4.98639600 | -1.05882500 |
| H | 0.04473600  | -2.94450500 | -0.58953700 |
| C | 2.58861100  | -5.84312800 | -0.25489800 |
| H | 3.81637600  | -4.47386000 | 0.85689700  |
| C | 1.39630000  | -6.03070700 | -0.95109600 |
| H | -0.44225500 | -5.10571900 | -1.61919900 |
| H | 3.31129500  | -6.65427600 | -0.18131900 |
| H | 1.18645600  | -6.99043000 | -1.42069000 |
| C | 2.09305800  | -2.05329500 | 2.78599100  |
| C | 2.10319600  | -0.87126400 | 3.53477200  |
| C | 2.01332900  | -3.28166400 | 3.44295800  |
| C | 2.03748300  | -0.92266900 | 4.92305600  |
| H | 2.17393600  | 0.09446200  | 3.02787600  |
| C | 1.93797000  | -3.33013300 | 4.83294900  |
| H | 2.00441000  | -4.20694500 | 2.86488900  |
| C | 1.95052000  | -2.15182000 | 5.57446300  |
| H | 2.05660000  | 0.00175200  | 5.49852000  |
| H | 1.87395300  | -4.29288800 | 5.33789600  |
| H | 1.89682800  | -2.19103600 | 6.66122600  |
| C | 2.76705900  | 3.40976000  | 1.12376600  |
| C | 1.39032100  | 3.16892200  | 1.20810100  |
| C | 3.22427500  | 4.72818900  | 1.18120200  |
| C | 0.48274300  | 4.21843200  | 1.28253500  |
| H | 0.99962300  | 2.15014600  | 1.17039600  |
| C | 2.31772700  | 5.78006400  | 1.29559200  |
| H | 4.29212800  | 4.93927900  | 1.12920200  |
| C | 0.94943300  | 5.53011600  | 1.33138700  |
| H | -0.58664800 | 4.00229700  | 1.27426000  |
| H | 2.68663200  | 6.80419000  | 1.33974500  |
| H | 0.24474500  | 6.35804500  | 1.39309500  |
| C | 5.52991400  | 2.62874200  | 0.64582900  |
| C | 6.56752500  | 2.27888900  | 1.51249700  |
| C | 5.81385300  | 3.44599200  | -0.45458200 |
| C | 7.86432200  | 2.73352100  | 1.28838800  |
| H | 6.35549500  | 1.62459000  | 2.35989700  |
| C | 7.10521400  | 3.91078500  | -0.67346600 |
| H | 5.01633000  | 3.71420300  | -1.14908000 |
| C | 8.13290500  | 3.55245200  | 0.19737800  |
| H | 8.66646700  | 2.44117100  | 1.96456200  |

|   |            |            |             |
|---|------------|------------|-------------|
| H | 7.31357500 | 4.55002400 | -1.53045900 |
| H | 9.14608300 | 3.91108400 | 0.02071100  |

**IM3**

|    |            |             |             |
|----|------------|-------------|-------------|
| S  | 6.92451200 | -1.19856700 | 0.68979900  |
| O  | 5.42844300 | -1.40053600 | 0.17028300  |
| O  | 7.94209900 | -1.97516600 | -0.12341800 |
| C  | 6.82066600 | -2.10859700 | 2.36113100  |
| O  | 7.17585800 | 0.26306800  | 1.05254200  |
| Ni | 4.58029900 | 0.25513900  | -0.18079200 |
| F  | 8.02399900 | -2.16750000 | 2.89365000  |
| F  | 6.34625200 | -3.32309900 | 2.17210500  |
| F  | 6.01133200 | -1.43372400 | 3.16238400  |
| C  | 6.61987500 | -0.13556800 | -2.43665800 |
| C  | 5.77339300 | 2.00300800  | -1.63181000 |
| C  | 7.07579300 | 2.49297300  | -1.57473000 |
| C  | 8.13230500 | 1.67142200  | -1.93884100 |
| C  | 7.91149200 | 0.35345000  | -2.35196000 |
| H  | 6.43236800 | -1.15820200 | -2.75748500 |
| H  | 7.23870800 | 3.50594900  | -1.21234400 |
| H  | 9.15168500 | 2.04752400  | -1.87154800 |
| H  | 8.75359900 | -0.29288200 | -2.58685300 |
| C  | 4.65767200 | 2.80378600  | -1.04488900 |
| O  | 4.59072600 | 4.02072700  | -1.04919800 |
| N  | 3.78693400 | 1.92328000  | -0.43941900 |
| H  | 2.56182700 | 1.66585600  | -1.94221700 |
| C  | 2.88609600 | 2.28875100  | 0.55804800  |
| C  | 2.65096300 | 1.24111800  | 1.48254100  |
| C  | 2.22723400 | 3.49247500  | 0.72619100  |
| C  | 1.73267000 | 1.37833600  | 2.54322400  |
| C  | 1.33915900 | 3.64569200  | 1.81449800  |
| H  | 2.41844800 | 4.31013400  | 0.03687400  |
| C  | 3.19573500 | -0.93918300 | 2.08732100  |
| C  | 1.54773600 | 0.24837300  | 3.37602200  |
| C  | 1.09178400 | 2.62921800  | 2.70807300  |
| H  | 0.84022600 | 4.60597700  | 1.94593600  |
| C  | 2.25578800 | -0.90351700 | 3.13693200  |
| H  | 3.77590200 | -1.82796500 | 1.85207100  |
| H  | 0.83743200 | 0.31121000  | 4.20135900  |
| H  | 0.41689400 | 2.77503100  | 3.54896700  |
| H  | 2.11871400 | -1.79052300 | 3.74982300  |
| N  | 3.39304800 | 0.10715800  | 1.30825900  |
| C  | 5.53319800 | 0.67955000  | -2.07821700 |
| S  | 1.89189900 | -1.97009400 | -0.81468800 |

|    |              |             |             |
|----|--------------|-------------|-------------|
| O  | 0.72176900   | -1.32468000 | -0.01258100 |
| O  | 2.71343500   | -0.97600400 | -1.64524400 |
| C  | 1.00792400   | -2.97734500 | -2.16636700 |
| O  | 2.63039400   | -3.01560000 | 0.00761200  |
| H  | 4.52309500   | 0.35572800  | -2.35939600 |
| F  | 0.39979400   | -2.13869600 | -2.99869800 |
| F  | 0.11571100   | -3.78879900 | -1.63182400 |
| F  | 1.90798800   | -3.67276200 | -2.82979300 |
| C  | 0.82783600   | 0.59172700  | -4.39124700 |
| H  | -0.24981800  | 0.47706200  | -4.53312900 |
| H  | 1.32072500   | -0.38177200 | -4.50473200 |
| H  | 1.24999600   | 1.26835400  | -5.14126600 |
| C  | 1.10957900   | 1.09113200  | -3.01333700 |
| O  | 2.33950400   | 1.56272600  | -2.89832800 |
| O  | 0.30385800   | 1.07878500  | -2.09690200 |
| Ag | -0.71683900  | 0.37606700  | 0.00660700  |
| C  | -3.38167500  | -1.24332700 | -0.74400700 |
| C  | -3.92221300  | 0.01324500  | -1.00020500 |
| C  | -3.73003900  | 0.64560700  | -2.26355700 |
| C  | -3.00791000  | -0.04419500 | -3.27944100 |
| C  | -2.45559100  | -1.31187500 | -2.98645700 |
| C  | -2.61364400  | -1.88500400 | -1.74903700 |
| H  | -4.80905000  | 2.46306900  | -1.78372700 |
| C  | -4.25054200  | 1.93332100  | -2.55460700 |
| C  | -2.86090800  | 0.56051000  | -4.55184700 |
| H  | -1.88941300  | -1.82626300 | -3.76215900 |
| H  | -2.16271200  | -2.85312600 | -1.52882200 |
| C  | -3.36500700  | 1.81201000  | -4.79941900 |
| C  | -4.05737800  | 2.50892800  | -3.78475400 |
| H  | -2.34007500  | 0.00648200  | -5.33426300 |
| H  | -3.23856500  | 2.26886000  | -5.77950600 |
| H  | -4.45252400  | 3.50363300  | -3.98423300 |
| C  | -8.94807800  | -0.07607800 | 0.08056300  |
| C  | -8.38377500  | 0.70760000  | 1.05376300  |
| C  | -6.99502300  | 0.98234300  | 1.04535800  |
| C  | -6.17891600  | 0.43330700  | 0.01425100  |
| C  | -8.14512300  | -0.61330200 | -0.94894700 |
| H  | -7.01994000  | 2.20608800  | 2.82712000  |
| H  | -10.01662400 | -0.28404700 | 0.09619200  |
| H  | -8.99351100  | 1.13470400  | 1.85021200  |
| C  | -6.39365300  | 1.78853600  | 2.03839200  |
| C  | -4.77058600  | 0.67953500  | 0.02585800  |
| H  | -8.59743600  | -1.23881100 | -1.71661700 |
| C  | -4.22224400  | 1.50013600  | 0.99856700  |

|   |             |             |             |
|---|-------------|-------------|-------------|
| C | -5.04972900 | 2.04729900  | 2.01357600  |
| H | -4.61077900 | 2.67199700  | 2.79004600  |
| P | -3.72694300 | -2.02656000 | 0.92620100  |
| P | -2.41864500 | 1.91766800  | 0.96659500  |
| C | -6.79713000 | -0.36259700 | -0.98430000 |
| H | -6.18659600 | -0.78205100 | -1.78210200 |
| C | -2.36361800 | 3.50244200  | 0.03184900  |
| C | -1.22916100 | 3.76327000  | -0.74086000 |
| C | -3.42393500 | 4.41558100  | 0.03044100  |
| C | -1.15279000 | 4.92406300  | -1.50395900 |
| H | -0.40873400 | 3.04440000  | -0.76417000 |
| C | -3.34785900 | 5.57004000  | -0.74009800 |
| H | -4.32037300 | 4.21154700  | 0.61780500  |
| C | -2.21325500 | 5.82389100  | -1.50811100 |
| H | -0.26504800 | 5.11674900  | -2.10404300 |
| H | -4.17935400 | 6.27285700  | -0.74435200 |
| H | -2.15962800 | 6.72624500  | -2.11503000 |
| C | -2.14030400 | 2.35996200  | 2.73244400  |
| C | -2.04302700 | 1.30118400  | 3.64115900  |
| C | -2.05720300 | 3.67395200  | 3.19336700  |
| C | -1.86627500 | 1.55718100  | 4.99609800  |
| H | -2.11110100 | 0.27002300  | 3.28507600  |
| C | -1.86962000 | 3.92690500  | 4.55034300  |
| H | -2.12769400 | 4.50398800  | 2.48986900  |
| C | -1.77375600 | 2.87107500  | 5.45212300  |
| H | -1.79880800 | 0.72843400  | 5.69940200  |
| H | -1.79858300 | 4.95436200  | 4.90323300  |
| H | -1.62749700 | 3.07093300  | 6.51212100  |
| C | -2.51382900 | -3.42581700 | 0.95061600  |
| C | -1.21718600 | -3.09329000 | 1.35617400  |
| C | -2.80098400 | -4.76071100 | 0.64892500  |
| C | -0.21545200 | -4.05361900 | 1.42344700  |
| H | -0.97375200 | -2.05798200 | 1.60547700  |
| C | -1.80644300 | -5.73017700 | 0.74401900  |
| H | -3.80745100 | -5.04943400 | 0.34743200  |
| C | -0.51424400 | -5.37940300 | 1.12503600  |
| H | 0.80049100  | -3.75476000 | 1.67936000  |
| H | -2.04390500 | -6.76773300 | 0.51211200  |
| H | 0.26414100  | -6.13840600 | 1.18272800  |
| C | -5.33470400 | -2.87245100 | 0.53164400  |
| C | -6.33961200 | -2.82655200 | 1.50066800  |
| C | -5.59575100 | -3.52057600 | -0.68124200 |
| C | -7.57827200 | -3.41772600 | 1.26839200  |
| H | -6.15163200 | -2.30246700 | 2.43907600  |

|   |             |             |             |
|---|-------------|-------------|-------------|
| C | -6.82870000 | -4.12016600 | -0.91150600 |
| H | -4.82827000 | -3.55054900 | -1.45630100 |
| C | -7.82228500 | -4.06856400 | 0.06366700  |
| H | -8.35540100 | -3.36478100 | 2.02943300  |
| H | -7.01673300 | -4.62646700 | -1.85746600 |
| H | -8.78995300 | -4.53423900 | -0.11835000 |

#### IM4

|    |            |             |             |
|----|------------|-------------|-------------|
| S  | 2.46285200 | 1.15027600  | -2.13500500 |
| O  | 2.63215100 | 2.48782300  | -1.44206200 |
| O  | 1.08119300 | 0.46764000  | -2.10985800 |
| C  | 2.71284100 | 1.47956200  | -3.98900000 |
| O  | 3.63590300 | 0.10810100  | -1.94406700 |
| Ni | 4.22490300 | -0.59285300 | -0.28297300 |
| C  | 8.10105900 | 1.64265400  | -0.38956000 |
| C  | 6.49045400 | 0.35997900  | 0.84387800  |
| C  | 5.44654300 | 1.12280400  | 0.27681100  |
| C  | 5.75355700 | 2.12952300  | -0.65342000 |
| C  | 7.07448600 | 2.37965100  | -0.98912200 |
| H  | 9.13731600 | 1.85603700  | -0.64877300 |
| H  | 4.43947700 | 1.13783400  | 0.74943500  |
| H  | 4.93845300 | 2.71183600  | -1.08022800 |
| H  | 7.31708400 | 3.16086400  | -1.70698100 |
| C  | 6.15375600 | -0.83702700 | 1.67018400  |
| O  | 6.85533900 | -1.26942400 | 2.57457200  |
| N  | 5.00177400 | -1.38135400 | 1.19213300  |
| C  | 4.43704100 | -2.57784200 | 1.59401900  |
| C  | 3.38512200 | -2.98248700 | 0.73686300  |
| C  | 4.74196500 | -3.35942200 | 2.69501200  |
| C  | 2.60514100 | -4.12786700 | 1.00247300  |
| C  | 3.96734400 | -4.51032700 | 2.95618000  |
| H  | 5.55806200 | -3.06507400 | 3.34821600  |
| C  | 2.17971200 | -2.47043700 | -1.18180700 |
| C  | 1.56730900 | -4.41579700 | 0.08888900  |
| C  | 2.91861400 | -4.89225200 | 2.15087900  |
| H  | 4.21202200 | -5.10714300 | 3.83358700  |
| C  | 1.35496600 | -3.59540900 | -0.99278500 |
| H  | 2.02184300 | -1.78898600 | -2.01468800 |
| H  | 0.93901000 | -5.29147700 | 0.25653400  |
| H  | 2.33052700 | -5.78081100 | 2.37680300  |
| H  | 0.56501200 | -3.78986900 | -1.71743500 |
| N  | 3.16452700 | -2.18378200 | -0.34926100 |
| C  | 7.81575200 | 0.63281400  | 0.52034300  |
| H  | 8.60121900 | 0.03312900  | 0.97670500  |

|    |             |             |             |
|----|-------------|-------------|-------------|
| F  | 2.63864800  | 0.33390200  | -4.63811900 |
| F  | 3.89273700  | 2.03193000  | -4.17125800 |
| F  | 1.76065200  | 2.29219800  | -4.40325400 |
| C  | 2.68506500  | -0.39998800 | 3.33695500  |
| H  | 2.12775200  | 0.23004000  | 4.04598000  |
| H  | 2.61403900  | -1.43603400 | 3.68793900  |
| H  | 3.73068700  | -0.07002200 | 3.33235900  |
| C  | 2.04234500  | -0.24372100 | 1.97541800  |
| O  | 2.43093800  | 0.69101000  | 1.21862500  |
| O  | 1.10462700  | -1.03771900 | 1.68786500  |
| Ag | 0.03691300  | 0.23935500  | 0.08562300  |
| C  | -2.73340600 | -1.31832600 | 0.15740500  |
| C  | -3.10567200 | -0.39765200 | 1.13157900  |
| C  | -2.63387400 | -0.53306200 | 2.47022500  |
| C  | -1.70262200 | -1.56690700 | 2.77622100  |
| C  | -1.33606800 | -2.48342400 | 1.76577800  |
| C  | -1.84749400 | -2.37340900 | 0.49884400  |
| H  | -3.77023500 | 1.11966500  | 3.29276100  |
| C  | -3.02132200 | 0.35752900  | 3.50429400  |
| C  | -1.12574900 | -1.61856900 | 4.06711700  |
| H  | -0.59310700 | -3.24636700 | 1.99906200  |
| H  | -1.53846900 | -3.07839700 | -0.27398300 |
| C  | -1.48116800 | -0.71017800 | 5.03056100  |
| C  | -2.45674000 | 0.27269700  | 4.75133700  |
| H  | -0.37799100 | -2.38645000 | 4.26556200  |
| H  | -1.02244100 | -0.75088400 | 6.01722500  |
| H  | -2.74826600 | 0.98140700  | 5.52521800  |
| C  | -8.16412800 | 0.33594500  | 0.53186800  |
| C  | -7.57554500 | 1.49508600  | 0.09543500  |
| C  | -6.17276000 | 1.67126700  | 0.17923900  |
| C  | -5.36946800 | 0.62070100  | 0.71154800  |
| C  | -7.37376400 | -0.69629800 | 1.08385400  |
| H  | -6.15934200 | 3.66119100  | -0.66418300 |
| H  | -9.24340400 | 0.21031900  | 0.46087600  |
| H  | -8.17665200 | 2.30338500  | -0.32197600 |
| C  | -5.54359100 | 2.85977700  | -0.25477300 |
| C  | -3.95057300 | 0.76992100  | 0.74681300  |
| H  | -7.84794500 | -1.61293000 | 1.43027500  |
| C  | -3.36887400 | 1.96778400  | 0.34606400  |
| C  | -4.18479400 | 3.01056800  | -0.15924500 |
| H  | -3.71970200 | 3.93638300  | -0.49583000 |
| P  | -3.38565000 | -1.05497800 | -1.57470600 |
| P  | -1.52653100 | 2.17404000  | 0.43116200  |
| C  | -6.01218900 | -0.55798500 | 1.17120300  |

|   |             |             |             |
|---|-------------|-------------|-------------|
| H | -5.40503100 | -1.35982800 | 1.58875900  |
| C | -1.24714400 | 2.84636900  | 2.12748400  |
| C | 0.01744900  | 2.66969600  | 2.69840800  |
| C | -2.23997600 | 3.51953800  | 2.84513700  |
| C | 0.27683000  | 3.16108100  | 3.97490900  |
| H | 0.81123800  | 2.16008000  | 2.14337900  |
| C | -1.97552800 | 4.00651700  | 4.12078200  |
| H | -3.23122900 | 3.65478900  | 2.40887900  |
| C | -0.71755200 | 3.82326000  | 4.68839100  |
| H | 1.26463600  | 3.02189000  | 4.41199800  |
| H | -2.75583700 | 4.52849000  | 4.67306200  |
| H | -0.51156300 | 4.20126600  | 5.68878800  |
| C | -1.17798600 | 3.61166800  | -0.66745100 |
| C | -0.80057700 | 3.34504800  | -1.98709000 |
| C | -1.26584700 | 4.93731900  | -0.23263100 |
| C | -0.54322600 | 4.39214500  | -2.86585500 |
| H | -0.67795400 | 2.31173700  | -2.31795600 |
| C | -0.99970800 | 5.98114600  | -1.11176200 |
| H | -1.53546000 | 5.15422500  | 0.80148700  |
| C | -0.64446200 | 5.70932700  | -2.42977200 |
| H | -0.24968600 | 4.17746000  | -3.89176400 |
| H | -1.06533300 | 7.01094300  | -0.76407800 |
| H | -0.43344600 | 6.52750800  | -3.11664100 |
| C | -2.21895300 | -2.09646500 | -2.57843500 |
| C | -1.08390100 | -1.42952800 | -3.05395900 |
| C | -2.41238700 | -3.43214000 | -2.94301500 |
| C | -0.15337400 | -2.07802600 | -3.85921700 |
| H | -0.92357400 | -0.37987400 | -2.80396000 |
| C | -1.48646400 | -4.08223700 | -3.75659500 |
| H | -3.29969000 | -3.96665000 | -2.60262200 |
| C | -0.35617000 | -3.40944100 | -4.21569700 |
| H | 0.71913400  | -1.52885500 | -4.21396000 |
| H | -1.65449700 | -5.12078100 | -4.03944400 |
| H | 0.36003500  | -3.92022000 | -4.85784400 |
| C | -4.92026300 | -2.10202900 | -1.50062500 |
| C | -6.04494300 | -1.62506300 | -2.17865200 |
| C | -5.02702500 | -3.28957400 | -0.76781000 |
| C | -7.24835700 | -2.32333100 | -2.13741200 |
| H | -5.97992500 | -0.67874300 | -2.71806200 |
| C | -6.22650200 | -3.99181400 | -0.72973400 |
| H | -4.16656000 | -3.65696400 | -0.20570500 |
| C | -7.33939500 | -3.50888800 | -1.41571000 |
| H | -8.11938400 | -1.93464700 | -2.66309500 |
| H | -6.29605200 | -4.91583000 | -0.15707000 |

|   |             |             |             |
|---|-------------|-------------|-------------|
| H | -8.28039200 | -4.05625200 | -1.38104800 |
|---|-------------|-------------|-------------|

**TS4-5**

|    |            |             |             |
|----|------------|-------------|-------------|
| S  | 2.43058900 | 0.43085500  | -2.50137200 |
| O  | 2.60009700 | 1.92637200  | -2.32380900 |
| O  | 1.08569500 | -0.20808700 | -2.08920300 |
| C  | 2.41703200 | 0.12034400  | -4.37932300 |
| O  | 3.65210000 | -0.46440400 | -2.07621100 |
| Ni | 4.01525800 | -0.84895300 | -0.22719900 |
| C  | 7.73180900 | 1.91841800  | 0.30911900  |
| C  | 6.08654300 | 0.38100700  | 1.11639400  |
| C  | 5.20182100 | 0.73833200  | 0.07706600  |
| C  | 5.62836000 | 1.68911400  | -0.86191400 |
| C  | 6.88297800 | 2.27821300  | -0.73893500 |
| H  | 8.71170600 | 2.38686600  | 0.39428500  |
| H  | 3.94699800 | 0.98799700  | 0.46481100  |
| H  | 4.95118400 | 1.99435100  | -1.65924500 |
| H  | 7.20558800 | 3.02773900  | -1.46032800 |
| C  | 5.62053700 | -0.68934900 | 2.03990100  |
| O  | 6.14355300 | -0.95619900 | 3.11470100  |
| N  | 4.52803400 | -1.30978400 | 1.49123700  |
| C  | 3.85894900 | -2.38365200 | 2.04173700  |
| C  | 2.92950500 | -2.96966100 | 1.14066600  |
| C  | 3.96917000 | -2.91684700 | 3.31730700  |
| C  | 2.11772000 | -4.06379100 | 1.51636900  |
| C  | 3.15249600 | -4.00489300 | 3.69069900  |
| H  | 4.69173900 | -2.49348100 | 4.00796900  |
| C  | 2.03851500 | -2.91043100 | -1.00323800 |
| C  | 1.22638700 | -4.56074000 | 0.53917000  |
| C  | 2.24242500 | -4.57441800 | 2.82987900  |
| H  | 3.25698400 | -4.40481700 | 4.69839800  |
| C  | 1.18133300 | -3.98735500 | -0.70845500 |
| H  | 2.02968300 | -2.43374900 | -1.98021100 |
| H  | 0.57447500 | -5.39818600 | 0.79207000  |
| H  | 1.62510400 | -5.41880000 | 3.13471400  |
| H  | 0.49536400 | -4.33952900 | -1.47740100 |
| N  | 2.88118900 | -2.42034800 | -0.11064700 |
| C  | 7.33745500 | 0.96653200  | 1.24581200  |
| H  | 7.98583600 | 0.66020200  | 2.06570300  |
| F  | 2.56443100 | -1.17220400 | -4.60494400 |
| F  | 3.38811600 | 0.79557500  | -4.94824200 |
| F  | 1.24495700 | 0.51914900  | -4.84271300 |
| C  | 3.21757900 | 1.12950800  | 3.19879900  |
| H  | 2.64348500 | 1.81571500  | 3.83579100  |



|    |             |             |             |
|----|-------------|-------------|-------------|
| H  | 3.42030000  | 0.22675100  | 3.78697300  |
| H  | 4.16053700  | 1.61156300  | 2.92013000  |
| C  | 2.36520900  | 0.78948600  | 2.00626200  |
| O  | 2.69776000  | 1.24826200  | 0.84179100  |
| O  | 1.32982800  | 0.12661200  | 2.17500600  |
| Ag | 0.25824900  | 0.34068600  | 0.08713900  |
| C  | -2.51742400 | -1.16674300 | 0.37777400  |
| C  | -2.78187900 | -0.11148100 | 1.24515200  |
| C  | -2.19932500 | -0.08404300 | 2.54670100  |
| C  | -1.31847600 | -1.13467800 | 2.93828100  |
| C  | -1.03139800 | -2.16920200 | 2.01919400  |
| C  | -1.61003200 | -2.18509600 | 0.77402100  |
| H  | -3.10860600 | 1.78185100  | 3.16556200  |
| C  | -2.43670500 | 0.97581200  | 3.45777600  |
| C  | -0.71719000 | -1.09390200 | 4.21757200  |
| H  | -0.31786700 | -2.94248200 | 2.31100100  |
| H  | -1.37275000 | -2.98752100 | 0.07387500  |
| C  | -0.96106900 | -0.05200400 | 5.07366200  |
| C  | -1.82419200 | 0.99638100  | 4.68507500  |
| H  | -0.03474500 | -1.89794900 | 4.49423500  |
| H  | -0.48237000 | -0.02263100 | 6.05094200  |
| H  | -2.00668100 | 1.82693100  | 5.36537600  |
| C  | -7.86891900 | 0.67121600  | 1.35215900  |
| C  | -7.35731400 | 1.71223800  | 0.62114400  |
| C  | -5.96040700 | 1.84935500  | 0.43524800  |
| C  | -5.08103700 | 0.88592300  | 1.01070300  |
| C  | -7.00072800 | -0.27922200 | 1.93274000  |
| H  | -6.09130600 | 3.64478800  | -0.76055900 |
| H  | -8.94473500 | 0.57514100  | 1.48973700  |
| H  | -8.01676900 | 2.45558300  | 0.17237900  |
| C  | -5.41430300 | 2.91567300  | -0.31439800 |
| C  | -3.67375200 | 0.99748700  | 0.78967300  |
| H  | -7.41302100 | -1.10441500 | 2.51078100  |
| C  | -3.17146900 | 2.08488200  | 0.08385200  |
| C  | -4.05981500 | 3.03730900  | -0.47393200 |
| H  | -3.65730200 | 3.86697900  | -1.05396000 |
| P  | -3.37363500 | -1.15811200 | -1.28461000 |
| P  | -1.34414900 | 2.28637700  | -0.12502000 |
| C  | -5.64320600 | -0.17544900 | 1.76635200  |
| H  | -4.97934500 | -0.91716700 | 2.20809200  |
| C  | -0.90061000 | 3.47679200  | 1.21283500  |
| C  | 0.46444700  | 3.64462200  | 1.47394000  |
| C  | -1.83955100 | 4.14946300  | 1.99717400  |
| C  | 0.87942200  | 4.46548700  | 2.51583400  |

|            |             |             |             |
|------------|-------------|-------------|-------------|
| H          | 1.20611900  | 3.12019700  | 0.86567800  |
| C          | -1.41885000 | 4.96406400  | 3.04516100  |
| H          | -2.90511500 | 4.02871300  | 1.79706800  |
| C          | -0.06174900 | 5.11748300  | 3.30940900  |
| H          | 1.94396900  | 4.58857000  | 2.71165300  |
| H          | -2.15695300 | 5.47934000  | 3.65823500  |
| H          | 0.26405300  | 5.74872700  | 4.13478900  |
| C          | -1.13305100 | 3.26427900  | -1.67046000 |
| C          | -0.76856000 | 2.57965100  | -2.83393900 |
| C          | -1.28419800 | 4.65421600  | -1.71059100 |
| C          | -0.58349300 | 3.27362400  | -4.02526400 |
| H          | -0.58651800 | 1.50301100  | -2.80326400 |
| C          | -1.10134800 | 5.34402900  | -2.90368600 |
| H          | -1.53459600 | 5.19983500  | -0.79941600 |
| C          | -0.75521800 | 4.65316500  | -4.06220400 |
| H          | -0.28243900 | 2.73092700  | -4.91971400 |
| H          | -1.21865400 | 6.42629900  | -2.92677600 |
| H          | -0.60225400 | 5.19592700  | -4.99371200 |
| C          | -2.38064300 | -2.41607300 | -2.21820800 |
| C          | -1.25417300 | -1.90834000 | -2.87412900 |
| C          | -2.69546300 | -3.76878200 | -2.37340300 |
| C          | -0.45009500 | -2.72900100 | -3.65531000 |
| H          | -0.99596900 | -0.85294600 | -2.77810100 |
| C          | -1.89901200 | -4.59063200 | -3.16820600 |
| H          | -3.57842200 | -4.18110400 | -1.88467400 |
| C          | -0.77594800 | -4.07441200 | -3.81155500 |
| H          | 0.42317100  | -2.30095900 | -4.14578500 |
| H          | -2.16258800 | -5.64038000 | -3.29165600 |
| H          | -0.16111700 | -4.71808500 | -4.43942400 |
| C          | -4.92100400 | -2.08685900 | -0.83617700 |
| C          | -6.11329100 | -1.64157800 | -1.41256400 |
| C          | -4.96670900 | -3.15121900 | 0.07196300  |
| C          | -7.32564600 | -2.24777800 | -1.09630600 |
| H          | -6.08885300 | -0.79322700 | -2.09816700 |
| C          | -6.17534600 | -3.76535900 | 0.38102000  |
| H          | -4.04834800 | -3.49308700 | 0.55267300  |
| C          | -7.35718400 | -3.31255800 | -0.20225100 |
| H          | -8.24844200 | -1.88158600 | -1.54400100 |
| H          | -6.19739100 | -4.59559000 | 1.08579100  |
| H          | -8.30456200 | -3.78909800 | 0.04601200  |
| <b>IM5</b> |             |             |             |
| S          | -0.82881500 | 2.59731900  | -2.05490400 |
| O          | -2.39486200 | 2.47455600  | -2.17063000 |

|    |             |             |             |
|----|-------------|-------------|-------------|
| O  | -0.19476500 | 1.25051000  | -1.69615200 |
| C  | -0.28280300 | 2.86901900  | -3.85788500 |
| O  | -0.34907300 | 3.84342600  | -1.32137700 |
| Ni | -3.21996000 | 1.34162000  | -0.83442300 |
| C  | -3.61921300 | -2.77629000 | -3.08546900 |
| C  | -4.03619300 | -1.25451200 | -1.28242800 |
| C  | -3.18940100 | -0.28184200 | -1.84556200 |
| C  | -2.53763500 | -0.60050500 | -3.04203700 |
| C  | -2.74802600 | -1.84271100 | -3.64748100 |
| H  | -3.77777900 | -3.73669900 | -3.57530300 |
| H  | -4.52268500 | -3.01204800 | 1.16484600  |
| H  | -1.85200000 | 0.10560400  | -3.50523800 |
| H  | -2.22058100 | -2.08288700 | -4.57086400 |
| C  | -4.60540500 | -0.89140900 | 0.03305000  |
| O  | -5.35013400 | -1.62620400 | 0.69906400  |
| N  | -4.17164100 | 0.34126600  | 0.39986100  |
| C  | -4.36814300 | 0.92924400  | 1.63360700  |
| C  | -3.89667700 | 2.27154500  | 1.69291900  |
| C  | -4.91278800 | 0.37019300  | 2.78056000  |
| C  | -3.98103100 | 3.03206000  | 2.88315900  |
| C  | -4.98870000 | 1.13120700  | 3.96450600  |
| H  | -5.27965500 | -0.64949500 | 2.75002200  |
| C  | -2.88257000 | 4.00566800  | 0.53166700  |
| C  | -3.47191500 | 4.35043100  | 2.83471900  |
| C  | -4.54028100 | 2.43063000  | 4.03438500  |
| H  | -5.42131400 | 0.66604300  | 4.84935900  |
| C  | -2.92990300 | 4.83452100  | 1.67011000  |
| H  | -2.43854600 | 4.35167200  | -0.39976200 |
| H  | -3.51280700 | 4.96784000  | 3.73239700  |
| H  | -4.60815700 | 3.00491900  | 4.95737500  |
| H  | -2.52791300 | 5.84233600  | 1.60757000  |
| N  | -3.34209200 | 2.76736600  | 0.54539900  |
| C  | -4.26962300 | -2.48375000 | -1.88938600 |
| H  | -4.94692200 | -3.19579900 | -1.41606700 |
| F  | 1.03418900  | 2.97041800  | -3.85886700 |
| F  | -0.82567600 | 3.97320500  | -4.32126800 |
| F  | -0.64538000 | 1.83549500  | -4.59272900 |
| C  | -2.74033500 | -3.28478200 | 1.77293100  |
| O  | -3.96263100 | -3.74268800 | 1.55137500  |
| O  | -2.35743000 | -2.17374700 | 1.44092200  |
| Ag | -1.21246500 | -0.51019000 | -0.20863100 |
| C  | 1.62031200  | 1.05226000  | 1.03193200  |
| C  | 1.73649800  | -0.19803300 | 1.62082000  |
| C  | 0.79893900  | -0.62870100 | 2.61733400  |

|   |             |             |             |
|---|-------------|-------------|-------------|
| C | -0.33196300 | 0.18342600  | 2.91513400  |
| C | -0.49138200 | 1.40296400  | 2.20941500  |
| C | 0.46137200  | 1.83379800  | 1.32566700  |
| H | 1.81009900  | -2.48516800 | 3.10433600  |
| C | 0.95382700  | -1.84782800 | 3.32490600  |
| C | -1.25739100 | -0.23342400 | 3.89935400  |
| H | -1.37555100 | 2.01344500  | 2.40560400  |
| H | 0.31118900  | 2.78426400  | 0.81069600  |
| C | -1.06052500 | -1.40374100 | 4.58929500  |
| C | 0.05850200  | -2.21182600 | 4.30142200  |
| H | -2.12587400 | 0.39742000  | 4.10002600  |
| H | -1.76889900 | -1.71328900 | 5.35672700  |
| H | 0.20816400  | -3.14137200 | 4.84996900  |
| C | 6.47598600  | -1.50268500 | 3.20519300  |
| C | 6.23546400  | -2.27233500 | 2.09471100  |
| C | 5.00373200  | -2.18341400 | 1.40437300  |
| C | 4.01475400  | -1.26906200 | 1.86580400  |
| C | 5.49465200  | -0.60086100 | 3.66786400  |
| H | 5.50342100  | -3.64805400 | -0.10778000 |
| H | 7.42545100  | -1.58560600 | 3.73178700  |
| H | 6.98832700  | -2.97014200 | 1.72653600  |
| C | 4.73078900  | -2.97214200 | 0.26041200  |
| C | 2.76996000  | -1.17190100 | 1.17334900  |
| H | 5.69303600  | 0.00553100  | 4.55009700  |
| C | 2.50987600  | -2.01010300 | 0.09863300  |
| C | 3.52047800  | -2.88933300 | -0.37318900 |
| H | 3.32265700  | -3.50017300 | -1.25467600 |
| P | 2.64653400  | 1.77081600  | -0.36631200 |
| P | 0.83430600  | -2.04591700 | -0.69902200 |
| C | 4.29634400  | -0.48152300 | 3.00895000  |
| H | 3.54050000  | 0.22156000  | 3.35877600  |
| C | 0.23518200  | -3.77134100 | -0.41915400 |
| C | -1.05630800 | -4.03765600 | -0.89237100 |
| C | 0.95385600  | -4.79410300 | 0.20148000  |
| C | -1.60625000 | -5.30715600 | -0.77622600 |
| H | -1.63765200 | -3.24517000 | -1.37145600 |
| C | 0.39851600  | -6.06745700 | 0.32180100  |
| H | 1.95452700  | -4.60641800 | 0.59026500  |
| C | -0.87529100 | -6.32869100 | -0.17116700 |
| H | -2.61491200 | -5.48933500 | -1.14655600 |
| H | 0.96917500  | -6.85880600 | 0.80563400  |
| H | -1.30486100 | -7.32477000 | -0.07492500 |
| C | 1.24331200  | -2.07695000 | -2.50601300 |
| C | 1.48317100  | -0.85128100 | -3.13985000 |

|   |             |             |             |
|---|-------------|-------------|-------------|
| C | 1.29103000  | -3.25518500 | -3.25584600 |
| C | 1.77573500  | -0.81270500 | -4.49914500 |
| H | 1.41278600  | 0.08005000  | -2.57494100 |
| C | 1.57712100  | -3.20938600 | -4.61772900 |
| H | 1.09686500  | -4.21604600 | -2.77805800 |
| C | 1.82000400  | -1.98968600 | -5.24148200 |
| H | 1.95495500  | 0.14895100  | -4.97832100 |
| H | 1.60796100  | -4.13368100 | -5.19293700 |
| H | 2.04023100  | -1.95612900 | -6.30740700 |
| C | 2.84060400  | 3.49310200  | 0.30195200  |
| C | 3.05402700  | 3.78637200  | 1.65426200  |
| C | 2.75925000  | 4.54686500  | -0.61126500 |
| C | 3.20982900  | 5.10016900  | 2.07878400  |
| H | 3.07820300  | 2.97577100  | 2.38532500  |
| C | 2.91688100  | 5.86409300  | -0.18759100 |
| H | 2.54544300  | 4.33053600  | -1.65861400 |
| C | 3.14655400  | 6.14146300  | 1.15529400  |
| H | 3.37629000  | 5.31407100  | 3.13386100  |
| H | 2.84641000  | 6.67617800  | -0.90955100 |
| H | 3.26515100  | 7.17193900  | 1.48739600  |
| C | 4.39213100  | 1.13603400  | -0.24138500 |
| C | 4.79380800  | 0.29371900  | -1.28459900 |
| C | 5.34189800  | 1.51902900  | 0.71118200  |
| C | 6.10170600  | -0.17619700 | -1.36214600 |
| H | 4.06737100  | 0.00036500  | -2.04588800 |
| C | 6.64792300  | 1.04988700  | 0.63652400  |
| H | 5.06400800  | 2.19611800  | 1.51830800  |
| C | 7.03034300  | 0.20026200  | -0.39872900 |
| H | 6.39287400  | -0.83368700 | -2.18039000 |
| H | 7.37233400  | 1.34743400  | 1.39412600  |
| H | 8.05621500  | -0.16192200 | -0.45551600 |
| C | -1.89677400 | -4.27595600 | 2.51168100  |
| H | -2.14514000 | -5.29791700 | 2.20811300  |
| H | -2.09858000 | -4.17716900 | 3.58642200  |
| H | -0.83860600 | -4.06558000 | 2.33397900  |

**TS5-6**

|    |             |             |             |
|----|-------------|-------------|-------------|
| S  | -1.61337900 | -2.94294200 | 0.81702100  |
| O  | -3.02824100 | -3.51015000 | 0.96521400  |
| O  | -1.53080000 | -1.39149800 | 0.96759600  |
| C  | -0.82913100 | -3.54798800 | 2.45553000  |
| O  | -0.78303000 | -3.52263500 | -0.32499700 |
| Ni | -3.51917600 | -0.41614100 | 0.01819800  |
| C  | -2.41081800 | 3.02681900  | 3.03701700  |

|    |             |             |             |
|----|-------------|-------------|-------------|
| C  | -3.32375500 | 2.17756400  | 0.97388200  |
| C  | -3.55829200 | 0.89893500  | 1.55330400  |
| C  | -3.04000200 | 0.69691400  | 2.84104400  |
| C  | -2.45847900 | 1.73877700  | 3.56089700  |
| H  | -1.98814300 | 3.84507600  | 3.61990800  |
| H  | -2.45893300 | 4.48193400  | -1.36570800 |
| H  | -3.09533500 | -0.28672600 | 3.30291800  |
| H  | -2.04780400 | 1.53784800  | 4.55016200  |
| C  | -3.32520400 | 2.29956600  | -0.50941000 |
| O  | -3.65727500 | 3.32729900  | -1.11793100 |
| N  | -2.85236300 | 1.13905200  | -1.04840400 |
| C  | -2.87887600 | 0.87614300  | -2.41875400 |
| C  | -3.10190200 | -0.49768700 | -2.72936500 |
| C  | -2.68492700 | 1.76975000  | -3.45776300 |
| C  | -3.05254600 | -0.95414800 | -4.06969700 |
| C  | -2.67430700 | 1.31548500  | -4.79163600 |
| H  | -2.52960800 | 2.81893600  | -3.23200000 |
| C  | -3.55232600 | -2.63606800 | -1.93476600 |
| C  | -3.22594600 | -2.33931400 | -4.29222100 |
| C  | -2.83140200 | -0.01479900 | -5.10373200 |
| H  | -2.52292700 | 2.04237500  | -5.58909700 |
| C  | -3.45924900 | -3.17615100 | -3.23206200 |
| H  | -3.75035300 | -3.26669800 | -1.06788000 |
| H  | -3.17057900 | -2.72281500 | -5.31126500 |
| H  | -2.80008700 | -0.36131500 | -6.13618300 |
| H  | -3.58467400 | -4.24692100 | -3.36789200 |
| N  | -3.37733200 | -1.34814800 | -1.68868900 |
| C  | -2.83151100 | 3.23649500  | 1.72538700  |
| H  | -2.70694600 | 4.20436000  | 1.23418500  |
| F  | 0.40615100  | -3.10632100 | 2.62115900  |
| F  | -0.82400900 | -4.86778500 | 2.46140700  |
| F  | -1.58049400 | -3.09600600 | 3.45219800  |
| C  | 0.57201900  | 5.27750900  | -2.06858500 |
| H  | 0.46888900  | 6.28580000  | -1.65597200 |
| H  | 1.51337000  | 4.81845300  | -1.75018700 |
| H  | 0.58509900  | 5.35608900  | -3.16398000 |
| C  | -0.58528700 | 4.41391400  | -1.66956800 |
| O  | -1.70592000 | 5.11396000  | -1.53635800 |
| O  | -0.52314500 | 3.20637900  | -1.51863900 |
| Ag | -0.59743200 | 0.74320500  | -0.22673200 |
| C  | -5.28274000 | -1.04569200 | 0.41308900  |
| C  | -5.18742800 | 0.12959600  | 1.29361000  |
| C  | -5.66160500 | -0.42675200 | 2.64048500  |
| C  | -5.71548700 | -2.21179200 | 1.27406900  |

|   |             |             |             |
|---|-------------|-------------|-------------|
| H | -5.42324400 | 0.20539500  | 3.50319200  |
| H | -5.78784400 | -0.93107200 | -0.55362100 |
| H | -5.69820900 | 1.03447800  | 0.94906600  |
| H | -5.47427400 | -3.20441500 | 0.88177100  |
| C | -7.21338300 | -1.95482900 | 1.55459100  |
| H | -7.79293200 | -1.79751300 | 0.63500600  |
| H | -7.65662900 | -2.81347000 | 2.07842900  |
| C | -5.10396100 | -1.85451100 | 2.62687400  |
| H | -4.01316900 | -1.94346900 | 2.61739600  |
| H | -5.50652100 | -2.46388200 | 3.44822600  |
| C | -7.17180600 | -0.70014500 | 2.46290300  |
| H | -7.69966600 | 0.16201300  | 2.03266600  |
| H | -7.62635100 | -0.89925500 | 3.44253400  |
| C | 1.91564000  | -1.00305800 | -1.34712900 |
| C | 2.63735800  | 0.17779100  | -1.42887700 |
| C | 2.34447500  | 1.14713800  | -2.43996200 |
| C | 1.25070500  | 0.92808100  | -3.32309400 |
| C | 0.44992500  | -0.22544700 | -3.13824900 |
| C | 0.76893500  | -1.16147300 | -2.18699600 |
| H | 3.94692000  | 2.51690000  | -1.92725800 |
| C | 3.11288000  | 2.32771700  | -2.60246100 |
| C | 0.97650600  | 1.86770800  | -4.34279900 |
| H | -0.41966000 | -0.36825800 | -3.78256900 |
| H | 0.14037400  | -2.04683800 | -2.06130000 |
| C | 1.76052800  | 2.98336300  | -4.49753000 |
| C | 2.83653800  | 3.21362600  | -3.61487400 |
| H | 0.12975700  | 1.67768300  | -5.00368900 |
| H | 1.55300600  | 3.69471700  | -5.29607800 |
| H | 3.45008200  | 4.10605400  | -3.73427900 |
| C | 7.78960600  | -0.09318900 | -1.06117700 |
| C | 7.35578000  | 0.38194900  | 0.15126800  |
| C | 5.97960700  | 0.60259500  | 0.39207700  |
| C | 5.03900800  | 0.30681000  | -0.63439600 |
| C | 6.85947000  | -0.38211400 | -2.08196200 |
| H | 6.23357400  | 1.29293900  | 2.42571300  |
| H | 8.85221400  | -0.25200400 | -1.23766000 |
| H | 8.06519000  | 0.60080700  | 0.94999000  |
| C | 5.51083200  | 1.09640700  | 1.63300400  |
| C | 3.64871900  | 0.51729500  | -0.39301100 |
| H | 7.21046100  | -0.76057400 | -3.04052600 |
| C | 3.23133900  | 1.06437000  | 0.81126400  |
| C | 4.17748800  | 1.32785900  | 1.83553400  |
| H | 3.83362900  | 1.72017200  | 2.79283700  |
| P | 2.09088200  | -2.36444400 | -0.07669100 |

|   |             |             |             |
|---|-------------|-------------|-------------|
| P | 1.47380600  | 1.61352100  | 1.04914500  |
| C | 5.51587800  | -0.19549500 | -1.87012700 |
| H | 4.79582200  | -0.42893100 | -2.65438200 |
| C | 1.66665100  | 3.45277800  | 1.03132900  |
| C | 0.50454800  | 4.19783600  | 1.24992200  |
| C | 2.87393300  | 4.12511400  | 0.83447500  |
| C | 0.54708500  | 5.58387000  | 1.31566000  |
| H | -0.44210800 | 3.67340200  | 1.37234400  |
| C | 2.91579700  | 5.51802500  | 0.88830200  |
| H | 3.79190900  | 3.56724700  | 0.65195000  |
| C | 1.75965000  | 6.24865100  | 1.13885700  |
| H | -0.37200600 | 6.14432700  | 1.48771100  |
| H | 3.86419200  | 6.03176600  | 0.73826500  |
| H | 1.79964800  | 7.33582200  | 1.18610500  |
| C | 1.15412600  | 1.26464100  | 2.83626000  |
| C | 0.60734600  | 0.01373900  | 3.14022400  |
| C | 1.41209400  | 2.17089200  | 3.86884600  |
| C | 0.35338300  | -0.33942600 | 4.46189500  |
| H | 0.35628700  | -0.68224900 | 2.33803800  |
| C | 1.14225800  | 1.82041000  | 5.18867100  |
| H | 1.81856700  | 3.15733500  | 3.64154600  |
| C | 0.62005000  | 0.56409400  | 5.48708500  |
| H | -0.06989700 | -1.31836800 | 4.68145100  |
| H | 1.34419100  | 2.53210700  | 5.98797000  |
| H | 0.41437400  | 0.29212600  | 6.52145100  |
| C | 2.17858600  | -3.82688100 | -1.21882100 |
| C | 2.70899100  | -3.78225900 | -2.51194100 |
| C | 1.73806000  | -5.05270100 | -0.71299600 |
| C | 2.80501900  | -4.93898200 | -3.27911500 |
| H | 3.04788600  | -2.83032000 | -2.92564000 |
| C | 1.84188600  | -6.21092300 | -1.47550000 |
| H | 1.28380600  | -5.09200100 | 0.27683300  |
| C | 2.37503000  | -6.15658900 | -2.75959800 |
| H | 3.21803700  | -4.88860100 | -4.28595600 |
| H | 1.49148000  | -7.15839100 | -1.06888700 |
| H | 2.44951300  | -7.06277600 | -3.35928800 |
| C | 3.84154200  | -2.40459600 | 0.56540300  |
| C | 4.00029600  | -2.07575500 | 1.91589000  |
| C | 4.94801500  | -2.89801900 | -0.13493400 |
| C | 5.23528400  | -2.20809600 | 2.54502100  |
| H | 3.14025500  | -1.71506800 | 2.48483700  |
| C | 6.18185100  | -3.03035200 | 0.49018900  |
| H | 4.84245200  | -3.19090400 | -1.17944400 |
| C | 6.32906800  | -2.68498400 | 1.83170800  |



|   |            |             |             |
|---|------------|-------------|-------------|
| H | 5.33753100 | -1.94394900 | 3.59701600  |
| H | 7.03513400 | -3.40518100 | -0.07422100 |
| H | 7.29601200 | -2.79664200 | 2.32108500  |

**IM6**

|    |             |             |             |
|----|-------------|-------------|-------------|
| S  | -1.64824400 | -2.59457600 | 0.46290300  |
| O  | -3.13788200 | -2.76628300 | 0.01571500  |
| O  | -1.31633100 | -1.18137000 | 0.99193000  |
| C  | -1.57077900 | -3.63521000 | 2.05428500  |
| O  | -0.63898000 | -3.23912100 | -0.48274800 |
| Ni | -3.84822300 | -1.06880900 | -0.69078400 |
| C  | -2.14493600 | 1.55894900  | 3.02252000  |
| C  | -3.80434800 | 1.26598500  | 1.27112600  |
| C  | -4.44176200 | 0.26103800  | 2.01637600  |
| C  | -3.88315000 | -0.08874600 | 3.24764500  |
| C  | -2.74069700 | 0.53112700  | 3.74140800  |
| H  | -1.26703100 | 2.07010400  | 3.42095700  |
| H  | -3.11032600 | 3.85287000  | -0.95215600 |
| H  | -4.35450100 | -0.86660400 | 3.84547400  |
| H  | -2.32730800 | 0.22432600  | 4.70171000  |
| C  | -4.17393400 | 1.71305400  | -0.11607100 |
| O  | -4.30491600 | 2.93572800  | -0.33091800 |
| N  | -4.16580700 | 0.75269000  | -1.05959700 |
| C  | -3.98306700 | 1.06413800  | -2.40185200 |
| C  | -3.22095600 | 0.09495000  | -3.12760800 |
| C  | -4.43361300 | 2.18386300  | -3.08362700 |
| C  | -2.96314300 | 0.25771300  | -4.51268800 |
| C  | -4.14206300 | 2.35479300  | -4.45231200 |
| H  | -5.01700300 | 2.92795000  | -2.55232100 |
| C  | -2.13735800 | -1.95569800 | -3.07736100 |
| C  | -2.27890300 | -0.79084400 | -5.16906400 |
| C  | -3.42708000 | 1.42299100  | -5.16573900 |
| H  | -4.51584900 | 3.24622100  | -4.95444000 |
| C  | -1.88114300 | -1.89930100 | -4.46177600 |
| H  | -1.80406800 | -2.80448800 | -2.47799800 |
| H  | -2.08692200 | -0.70846000 | -6.23966100 |
| H  | -3.23367500 | 1.54976100  | -6.23069100 |
| H  | -1.36132200 | -2.72463800 | -4.94282700 |
| N  | -2.77131200 | -0.99176500 | -2.43114000 |
| C  | -2.68956700 | 1.92583300  | 1.79655200  |
| H  | -2.27010500 | 2.74931700  | 1.21715200  |
| F  | -0.31013000 | -3.68987300 | 2.44876500  |
| F  | -2.01817800 | -4.84580400 | 1.80310100  |
| F  | -2.29841200 | -3.05967300 | 2.98902800  |

|    |             |             |             |
|----|-------------|-------------|-------------|
| C  | -0.05832000 | 4.24918100  | -1.91318800 |
| H  | 0.01091600  | 5.26030200  | -1.49999400 |
| H  | 0.82006200  | 3.65910300  | -1.62987100 |
| H  | -0.07338400 | 4.32037400  | -3.00848400 |
| C  | -1.30658800 | 3.56573500  | -1.45786500 |
| O  | -2.30479900 | 4.38950500  | -1.23501300 |
| O  | -1.40913700 | 2.34838000  | -1.32764000 |
| Ag | -0.35400900 | 0.69244300  | -0.00458300 |
| C  | -5.53081600 | -1.18784100 | 0.20472500  |
| C  | -5.72408400 | -0.35176100 | 1.49731100  |
| C  | -6.39776400 | -1.37172200 | 2.43105700  |
| C  | -5.98024700 | -2.60012000 | 0.59751100  |
| H  | -6.41480900 | -1.07149100 | 3.48688600  |
| H  | -6.15958100 | -0.79613000 | -0.61167800 |
| H  | -6.41569300 | 0.48622100  | 1.30183500  |
| H  | -5.56593600 | -3.40146800 | -0.02595000 |
| C  | -7.51754600 | -2.57960200 | 0.64870300  |
| H  | -7.96205600 | -2.19433400 | -0.27892300 |
| H  | -7.91350900 | -3.59450500 | 0.80463900  |
| C  | -5.64434300 | -2.66378200 | 2.08785900  |
| H  | -4.56764200 | -2.61695200 | 2.28076900  |
| H  | -6.06473500 | -3.54932300 | 2.58767300  |
| C  | -7.80018000 | -1.67693600 | 1.87696300  |
| H  | -8.34271400 | -0.75759700 | 1.61470900  |
| H  | -8.40383600 | -2.20387100 | 2.62855200  |
| C  | 2.24044300  | -0.74434400 | -1.18012400 |
| C  | 2.92818700  | 0.45676800  | -1.26761100 |
| C  | 2.63840900  | 1.38871200  | -2.31868000 |
| C  | 1.58034200  | 1.11030800  | -3.23009200 |
| C  | 0.81518800  | -0.06433900 | -3.04242300 |
| C  | 1.13924600  | -0.96602200 | -2.06402400 |
| H  | 4.18031400  | 2.82762800  | -1.80771700 |
| C  | 3.37136600  | 2.59042600  | -2.49752500 |
| C  | 1.30809000  | 2.00802600  | -4.28752700 |
| H  | -0.03094300 | -0.25422200 | -3.70372800 |
| H  | 0.54246300  | -1.87271300 | -1.94697000 |
| C  | 2.06052200  | 3.14446100  | -4.45464200 |
| C  | 3.09665300  | 3.43824500  | -3.54418400 |
| H  | 0.48611100  | 1.77318500  | -4.96568800 |
| H  | 1.85355600  | 3.82509200  | -5.27904100 |
| H  | 3.68507000  | 4.34554100  | -3.67122400 |
| C  | 8.07990200  | 0.44381700  | -0.83509300 |
| C  | 7.61091300  | 0.95462400  | 0.34934300  |
| C  | 6.22318200  | 1.11712100  | 0.56896100  |

|   |             |             |             |
|---|-------------|-------------|-------------|
| C | 5.30734900  | 0.72538700  | -0.44807100 |
| C | 7.17504200  | 0.06232700  | -1.84798600 |
| H | 6.42722800  | 1.94263400  | 2.55748500  |
| H | 9.15067000  | 0.32967500  | -0.99571700 |
| H | 8.30064900  | 1.24906500  | 1.14085800  |
| C | 5.72099300  | 1.65438600  | 1.77821600  |
| C | 3.90441100  | 0.86604300  | -0.22169600 |
| H | 7.55337200  | -0.34306700 | -2.78486300 |
| C | 3.44974200  | 1.42597500  | 0.96332000  |
| C | 4.37544100  | 1.80856300  | 1.96895600  |
| H | 4.00616800  | 2.22484300  | 2.90600600  |
| P | 2.39128000  | -2.05634700 | 0.14857000  |
| P | 1.64476300  | 1.75721700  | 1.24104500  |
| C | 5.82194100  | 0.19302200  | -1.65587200 |
| H | 5.12371300  | -0.11352500 | -2.43444100 |
| C | 1.56826200  | 3.60405700  | 1.19837200  |
| C | 0.34270100  | 4.20968800  | 1.50407100  |
| C | 2.63169100  | 4.40550700  | 0.77805800  |
| C | 0.18479900  | 5.58559200  | 1.40009900  |
| H | -0.49931800 | 3.59675600  | 1.82850400  |
| C | 2.47083800  | 5.78511900  | 0.66905100  |
| H | 3.59262500  | 3.95382700  | 0.53272100  |
| C | 1.25172800  | 6.37750700  | 0.97945500  |
| H | -0.77863500 | 6.03569600  | 1.63318800  |
| H | 3.30809800  | 6.39862000  | 0.33988000  |
| H | 1.12924700  | 7.45561300  | 0.89062100  |
| C | 1.40810900  | 1.33894800  | 3.02372200  |
| C | 0.97077500  | 0.04181800  | 3.31902400  |
| C | 1.60473800  | 2.25212400  | 4.06375600  |
| C | 0.76164000  | -0.34039200 | 4.63994100  |
| H | 0.76496800  | -0.66911500 | 2.51432700  |
| C | 1.37483700  | 1.87030400  | 5.38220400  |
| H | 1.91905500  | 3.27275300  | 3.84124400  |
| C | 0.95810000  | 0.57357100  | 5.67146900  |
| H | 0.41629200  | -1.35013000 | 4.85634000  |
| H | 1.51963200  | 2.59009700  | 6.18625800  |
| H | 0.77671400  | 0.27844000  | 6.70372200  |
| C | 2.48365000  | -3.56910100 | -0.92389100 |
| C | 3.03459000  | -3.59192100 | -2.20916800 |
| C | 2.01436200  | -4.76293700 | -0.37079000 |
| C | 3.12372100  | -4.78411600 | -2.92017900 |
| H | 3.39093800  | -2.66544200 | -2.66322200 |
| C | 2.11056500  | -5.95712300 | -1.07721000 |
| H | 1.54687100  | -4.74716800 | 0.61354300  |

|   |            |             |             |
|---|------------|-------------|-------------|
| C | 2.66555300 | -5.96985500 | -2.35277100 |
| H | 3.55299300 | -4.78691400 | -3.92133600 |
| H | 1.73734000 | -6.87913900 | -0.63430600 |
| H | 2.73412400 | -6.90341700 | -2.90930500 |
| C | 4.13941400 | -2.04019600 | 0.79337700  |
| C | 4.30363800 | -1.66412900 | 2.13057600  |
| C | 5.25574800 | -2.49781700 | 0.08564100  |
| C | 5.55429900 | -1.71762700 | 2.73949400  |
| H | 3.43853200 | -1.32470800 | 2.70444100  |
| C | 6.50563100 | -2.54953700 | 0.69045200  |
| H | 5.14705200 | -2.82415500 | -0.94857000 |
| C | 6.65834000 | -2.15844100 | 2.01840200  |
| H | 5.66196200 | -1.41702900 | 3.78095500  |
| H | 7.36661000 | -2.89852900 | 0.12147900  |
| H | 7.63844500 | -2.20524500 | 2.49156900  |

### IM7

|    |            |             |             |
|----|------------|-------------|-------------|
| S  | 3.76952500 | -2.80968000 | -0.51410900 |
| O  | 2.71964500 | -1.65782500 | -0.11250700 |
| O  | 3.32645200 | -3.65919800 | -1.68780100 |
| C  | 3.60767200 | -3.98843700 | 0.97898800  |
| O  | 5.18392800 | -2.23467300 | -0.46880500 |
| Ni | 3.56400300 | 0.01085000  | -0.34794900 |
| F  | 4.49246300 | -4.95086600 | 0.83221100  |
| F  | 2.38971200 | -4.48432500 | 0.98601000  |
| F  | 3.84087600 | -3.33473700 | 2.10250800  |
| C  | 2.37519500 | -0.72734200 | -3.12893600 |
| C  | 4.48912200 | 0.39104700  | -2.67212400 |
| C  | 5.14471700 | -0.47168500 | -3.54743100 |
| C  | 4.41380700 | -1.44951500 | -4.20724900 |
| C  | 3.03859700 | -1.58204500 | -3.99531000 |
| H  | 1.29246900 | -0.80088800 | -3.00800100 |
| H  | 6.22152300 | -0.38149800 | -3.67109200 |
| H  | 4.92216700 | -2.13526800 | -4.88209000 |
| H  | 2.48114300 | -2.36641500 | -4.50286000 |
| C  | 5.30074000 | 1.31414000  | -1.85329800 |
| O  | 6.42653600 | 1.67439900  | -2.07092500 |
| N  | 4.59709400 | 1.60513600  | -0.61602000 |
| H  | 3.79794600 | 2.33522800  | -0.66372100 |
| C  | 5.37556300 | 1.91384700  | 0.55773400  |
| C  | 4.97704100 | 1.17325500  | 1.68066100  |
| C  | 6.30985500 | 2.90906700  | 0.67421900  |
| C  | 5.50116400 | 1.45733000  | 2.95900900  |
| C  | 6.88062000 | 3.16458900  | 1.94223400  |

|    |             |             |             |
|----|-------------|-------------|-------------|
| H  | 6.59619800  | 3.49753900  | -0.19257600 |
| C  | 3.51937900  | -0.42775400 | 2.51462900  |
| C  | 4.96955100  | 0.72729400  | 4.04315900  |
| C  | 6.48464500  | 2.46849300  | 3.05826500  |
| H  | 7.63003700  | 3.94770400  | 2.03127100  |
| C  | 3.97455100  | -0.19442600 | 3.82444800  |
| H  | 2.74169600  | -1.15501200 | 2.29399400  |
| H  | 5.34344500  | 0.91772200  | 5.04860300  |
| H  | 6.91073200  | 2.69524500  | 4.03454100  |
| H  | 3.52853700  | -0.75104700 | 4.64461200  |
| N  | 4.03220400  | 0.20860600  | 1.48147300  |
| C  | 3.09162700  | 0.27105200  | -2.44145400 |
| S  | 1.93063200  | 2.90140200  | 1.11603800  |
| O  | 2.65425100  | 3.29711800  | -0.20203800 |
| O  | 1.12252300  | 1.58272800  | 1.02686800  |
| C  | 0.60983700  | 4.27004200  | 1.22565700  |
| O  | 2.78530300  | 3.03965800  | 2.37432400  |
| H  | 2.48900200  | 1.09528000  | -2.01009200 |
| F  | -0.34606000 | 4.01679900  | 0.35810500  |
| F  | 1.17011300  | 5.43022800  | 0.96269800  |
| F  | 0.11588600  | 4.28630500  | 2.45331700  |
| C  | 0.79743300  | 2.44206000  | -4.51962800 |
| H  | -0.03056400 | 2.77927800  | -5.15514700 |
| H  | 1.40969300  | 1.76685200  | -5.13278100 |
| H  | 1.40373600  | 3.29909200  | -4.20939800 |
| C  | 0.24627300  | 1.67515900  | -3.33117600 |
| O  | 0.65546500  | 2.03650500  | -2.17698000 |
| O  | -0.54908300 | 0.74065400  | -3.54390300 |
| Ag | -0.38840100 | 0.63932600  | -0.71459400 |
| C  | -3.44480500 | 0.99950100  | 0.57334200  |
| C  | -3.42470600 | -0.24213200 | 1.20002200  |
| C  | -2.87323800 | -0.38766300 | 2.50671300  |
| C  | -2.24155100 | 0.73168400  | 3.12113200  |
| C  | -2.20903100 | 1.96198100  | 2.42880500  |
| C  | -2.81223700 | 2.10098700  | 1.20398500  |
| H  | -3.41043100 | -2.47322800 | 2.75926600  |
| C  | -2.93215300 | -1.61124300 | 3.22376800  |
| C  | -1.67154900 | 0.58531800  | 4.40941500  |
| H  | -1.71020100 | 2.80819300  | 2.89736300  |
| H  | -2.79313300 | 3.06575700  | 0.69701900  |
| C  | -1.75284200 | -0.60763800 | 5.08074600  |
| C  | -2.39760400 | -1.71361500 | 4.48262700  |
| H  | -1.17918200 | 1.44781600  | 4.85938700  |
| H  | -1.32357700 | -0.70648300 | 6.07684500  |

|   |             |             |             |
|---|-------------|-------------|-------------|
| H | -2.46270600 | -2.65730000 | 5.02229200  |
| C | -7.95860500 | -2.70225300 | 0.83349300  |
| C | -7.10812100 | -3.37058500 | -0.00906700 |
| C | -5.75217700 | -2.97950600 | -0.12840800 |
| C | -5.27862100 | -1.86770700 | 0.62649600  |
| C | -7.48588700 | -1.61514300 | 1.60115200  |
| H | -5.21351800 | -4.51977600 | -1.54605500 |
| H | -8.99917900 | -3.01146300 | 0.91840400  |
| H | -7.45780600 | -4.21861200 | -0.59857500 |
| C | -4.85008200 | -3.66777800 | -0.97064700 |
| C | -3.92182800 | -1.45036300 | 0.48465200  |
| H | -8.16486300 | -1.09239800 | 2.27276000  |
| C | -3.05496900 | -2.16968900 | -0.32775700 |
| C | -3.53773600 | -3.28431300 | -1.05910600 |
| H | -2.86007800 | -3.83591500 | -1.70917700 |
| P | -4.26996600 | 1.13340500  | -1.10768200 |
| P | -1.25434500 | -1.69803900 | -0.40755400 |
| C | -6.18020500 | -1.20852600 | 1.50080600  |
| H | -5.82157700 | -0.36642100 | 2.09031600  |
| C | -0.57327800 | -2.61529400 | 1.04667800  |
| C | 0.28101500  | -1.94580000 | 1.92624100  |
| C | -0.97611600 | -3.92156100 | 1.34544700  |
| C | 0.70546400  | -2.57087500 | 3.09633700  |
| H | 0.59006800  | -0.91961500 | 1.70788700  |
| C | -0.53991400 | -4.54669500 | 2.50807000  |
| H | -1.65514800 | -4.44680500 | 0.67245100  |
| C | 0.29331300  | -3.86600700 | 3.39217300  |
| H | 1.33275400  | -2.02637800 | 3.80337300  |
| H | -0.86289100 | -5.56232800 | 2.73119900  |
| H | 0.61835100  | -4.34523900 | 4.31464300  |
| C | -0.69713300 | -2.61195600 | -1.90407700 |
| C | -1.19531900 | -2.15530200 | -3.13332600 |
| C | 0.20962500  | -3.66948300 | -1.87644600 |
| C | -0.80126600 | -2.77125400 | -4.31345100 |
| H | -1.86962500 | -1.29916400 | -3.16595900 |
| C | 0.60710700  | -4.28000500 | -3.06430000 |
| H | 0.61532900  | -4.02562900 | -0.93166900 |
| C | 0.09651200  | -3.83888000 | -4.27956700 |
| H | -1.18970400 | -2.40615300 | -5.26257700 |
| H | 1.32909500  | -5.09345600 | -3.02981400 |
| H | 0.40302700  | -4.32212200 | -5.20709600 |
| C | -6.04244400 | 1.29549300  | -0.56442500 |
| C | -7.00682400 | 0.67333200  | -1.36109000 |
| C | -6.45550200 | 1.96755900  | 0.59208900  |

|   |             |            |             |
|---|-------------|------------|-------------|
| C | -8.35495600 | 0.72624900 | -1.01920400 |
| H | -6.69024600 | 0.12326800 | -2.24849200 |
| C | -7.80277800 | 2.02942300 | 0.93101000  |
| H | -5.71172000 | 2.43263500 | 1.24190100  |
| C | -8.75466100 | 1.40912300 | 0.12459800  |
| H | -9.09386900 | 0.22938400 | -1.64625200 |
| H | -8.11126400 | 2.56053500 | 1.83086300  |
| H | -9.80913900 | 1.45275500 | 0.39413500  |
| C | -3.81828800 | 2.87780000 | -1.54177500 |
| C | -2.59796200 | 3.01249800 | -2.21124000 |
| C | -4.53229800 | 4.02684600 | -1.19138800 |
| C | -2.06490600 | 4.27241100 | -2.46579000 |
| H | -2.06610300 | 2.11802300 | -2.54378800 |
| C | -4.01161900 | 5.28650700 | -1.47232400 |
| H | -5.49665900 | 3.94053100 | -0.69170000 |
| C | -2.77035400 | 5.41164300 | -2.09162100 |
| H | -1.08983400 | 4.35770100 | -2.94407000 |
| H | -4.57516700 | 6.17681200 | -1.19527200 |
| H | -2.35713500 | 6.39976400 | -2.28944100 |

**TS7-8**

|    |            |             |             |
|----|------------|-------------|-------------|
| S  | 3.95081200 | 3.00322800  | 0.31153500  |
| O  | 2.92159900 | 1.78716200  | 0.10710700  |
| O  | 3.67837100 | 3.81795500  | 1.56427100  |
| C  | 3.38671400 | 4.15087600  | -1.09934800 |
| O  | 5.37028000 | 2.56863600  | -0.03155200 |
| Ni | 3.80315200 | 0.12590200  | 0.30875100  |
| F  | 4.16460000 | 5.21185100  | -1.10607400 |
| F  | 2.13821800 | 4.50475700  | -0.87719400 |
| F  | 3.48192200 | 3.52049600  | -2.25689300 |
| C  | 3.60713200 | 1.31706400  | 3.17238500  |
| C  | 5.18283500 | -0.42445600 | 2.61180900  |
| C  | 5.97941700 | -0.07950300 | 3.69919500  |
| C  | 5.57983800 | 0.96763200  | 4.52282500  |
| C  | 4.40005900 | 1.66454200  | 4.25991800  |
| H  | 2.66263800 | 1.82438700  | 2.98423300  |
| H  | 6.91047800 | -0.61635600 | 3.87086300  |
| H  | 6.19599400 | 1.24865800  | 5.37508100  |
| H  | 4.09757700 | 2.48802500  | 4.90507000  |
| C  | 5.64416100 | -1.44610100 | 1.66430700  |
| O  | 6.65996100 | -2.08805600 | 1.73567300  |
| N  | 4.73498400 | -1.54688800 | 0.51410900  |
| H  | 3.88372800 | -2.15721800 | 0.68860100  |
| C  | 5.29480500 | -1.97517800 | -0.75079500 |

|    |             |             |             |
|----|-------------|-------------|-------------|
| C  | 4.80370800  | -1.23823500 | -1.84195200 |
| C  | 6.11567000  | -3.05385700 | -0.95599500 |
| C  | 5.13905300  | -1.59832900 | -3.16496700 |
| C  | 6.49004400  | -3.39233200 | -2.27649800 |
| H  | 6.46940600  | -3.64134500 | -0.11528900 |
| C  | 3.38233700  | 0.45113300  | -2.55133300 |
| C  | 4.53098100  | -0.86175400 | -4.20174400 |
| C  | 6.01537400  | -2.69070100 | -3.35594500 |
| H  | 7.15168400  | -4.24181000 | -2.42997900 |
| C  | 3.64618100  | 0.14359500  | -3.89722500 |
| H  | 2.69783300  | 1.24589400  | -2.26482300 |
| H  | 4.75740500  | -1.11314000 | -5.23749800 |
| H  | 6.28858600  | -2.97635500 | -4.37082100 |
| H  | 3.14832700  | 0.71127200  | -4.67893400 |
| N  | 3.96127000  | -0.20150300 | -1.56241300 |
| C  | 3.98589500  | 0.26630200  | 2.33010200  |
| S  | 1.79770200  | -2.89644200 | -1.04991900 |
| O  | 2.46176900  | -3.03724700 | 0.34505300  |
| O  | 0.92512200  | -1.62827700 | -1.22423500 |
| C  | 0.51855800  | -4.31000500 | -1.04654800 |
| O  | 2.71138300  | -3.19513100 | -2.23378600 |
| H  | 2.93721500  | -0.27648200 | 1.98008000  |
| F  | -0.43625100 | -4.04985800 | -0.17331900 |
| F  | 1.12093200  | -5.43756100 | -0.73265000 |
| F  | -0.00229200 | -4.40327200 | -2.25860600 |
| C  | 2.05078400  | -2.31429600 | 3.56769600  |
| H  | 2.51947800  | -1.55073800 | 4.20215300  |
| H  | 2.84762100  | -2.84839300 | 3.03107200  |
| H  | 1.51376200  | -3.03552500 | 4.18933800  |
| C  | 1.12550000  | -1.68854400 | 2.55296700  |
| O  | 0.00033000  | -2.18289900 | 2.35341800  |
| O  | 1.54131400  | -0.66125100 | 1.91253500  |
| Ag | -0.57714200 | -0.82098700 | 0.46463000  |
| C  | -3.70099900 | -0.94844800 | -0.46609000 |
| C  | -3.65572100 | 0.30619000  | -1.06639100 |
| C  | -3.12615000 | 0.46136100  | -2.38065000 |
| C  | -2.52533800 | -0.65975100 | -3.02482100 |
| C  | -2.49935200 | -1.90126500 | -2.35116800 |
| C  | -3.09781600 | -2.05150700 | -1.12403300 |
| H  | -3.61698100 | 2.56368700  | -2.58373200 |
| C  | -3.16214400 | 1.70130700  | -3.07044000 |
| C  | -1.96875400 | -0.50028300 | -4.31729600 |
| H  | -2.01096000 | -2.74751300 | -2.83355500 |
| H  | -3.08888400 | -3.02708800 | -0.63718300 |



|   |             |             |             |
|---|-------------|-------------|-------------|
| C | -2.02999900 | 0.70828900  | -4.96225000 |
| C | -2.63986700 | 1.81694100  | -4.33315100 |
| H | -1.50063300 | -1.36374800 | -4.79046700 |
| H | -1.60956500 | 0.81829600  | -5.96084300 |
| H | -2.68716900 | 2.77322200  | -4.85188500 |
| C | -8.03566400 | 2.96977900  | -0.32528100 |
| C | -7.11112800 | 3.53546400  | 0.51449400  |
| C | -5.77129700 | 3.07647100  | 0.53175600  |
| C | -5.39339300 | 2.00379800  | -0.32795700 |
| C | -7.65836000 | 1.91976200  | -1.19207500 |
| H | -5.08861600 | 4.47736900  | 2.02934500  |
| H | -9.06281800 | 3.33105300  | -0.33047200 |
| H | -7.38898800 | 4.35367500  | 1.17951300  |
| C | -4.79534500 | 3.65728000  | 1.37313100  |
| C | -4.05643000 | 1.51226100  | -0.28583900 |
| H | -8.39790400 | 1.47173800  | -1.85404000 |
| C | -3.11262800 | 2.13695600  | 0.52086700  |
| C | -3.49878000 | 3.21325900  | 1.35702400  |
| H | -2.75710500 | 3.67940300  | 2.00498500  |
| P | -4.47650000 | -1.08687100 | 1.23772700  |
| P | -1.34618700 | 1.56349900  | 0.45769600  |
| C | -6.37043100 | 1.44947800  | -1.19340800 |
| H | -6.08290700 | 0.63442200  | -1.85629900 |
| C | -0.68520300 | 2.54092900  | -0.96027500 |
| C | 0.12318900  | 1.89282900  | -1.89668600 |
| C | -1.03627800 | 3.87994200  | -1.16250900 |
| C | 0.55889300  | 2.57676000  | -3.02837600 |
| H | 0.38080300  | 0.83868100  | -1.75682600 |
| C | -0.57986000 | 4.56386100  | -2.28253600 |
| H | -1.67840200 | 4.38754400  | -0.44145300 |
| C | 0.21556400  | 3.91046500  | -3.22030100 |
| H | 1.15703600  | 2.05761600  | -3.77737600 |
| H | -0.85235600 | 5.60790800  | -2.42879000 |
| H | 0.56043000  | 4.44098200  | -4.10688400 |
| C | -0.60344700 | 2.31660400  | 1.96409300  |
| C | -1.01593300 | 1.80154700  | 3.20094900  |
| C | 0.38646800  | 3.29679100  | 1.92285400  |
| C | -0.46863200 | 2.29261400  | 4.37833400  |
| H | -1.76989600 | 1.01008800  | 3.23479800  |
| C | 0.94178600  | 3.78104800  | 3.10688500  |
| H | 0.75231700  | 3.67187300  | 0.96739000  |
| C | 0.50801800  | 3.28836900  | 4.33243100  |
| H | -0.80162400 | 1.89466600  | 5.33566000  |
| H | 1.73768100  | 4.52177900  | 3.05042400  |

|   |              |             |             |
|---|--------------|-------------|-------------|
| H | 0.93890600   | 3.66987000  | 5.25757400  |
| C | -6.27215500  | -1.13455000 | 0.75823200  |
| C | -7.18017600  | -0.50047700 | 1.60958300  |
| C | -6.75294800  | -1.75141200 | -0.40267700 |
| C | -8.54062400  | -0.48859600 | 1.31595200  |
| H | -6.81005000  | 0.00332600  | 2.50369400  |
| C | -8.11206000  | -1.74502300 | -0.69566000 |
| H | -6.05238900  | -2.23036200 | -1.08933300 |
| C | -9.00805300  | -1.11363400 | 0.16481500  |
| H | -9.23604800  | 0.01452600  | 1.98627500  |
| H | -8.47439400  | -2.23147100 | -1.60057500 |
| H | -10.07225200 | -1.10565100 | -0.06725200 |
| C | -4.12187100  | -2.86529000 | 1.61859000  |
| C | -2.87587100  | -3.10526300 | 2.20560400  |
| C | -4.95046400  | -3.95072600 | 1.32168700  |
| C | -2.43492500  | -4.40346600 | 2.43787700  |
| H | -2.22156200  | -2.27434600 | 2.47024400  |
| C | -4.52244900  | -5.24916200 | 1.58227200  |
| H | -5.93378500  | -3.78642200 | 0.88236700  |
| C | -3.26042100  | -5.47900400 | 2.12554600  |
| H | -1.44159800  | -4.55371400 | 2.85705400  |
| H | -5.17624500  | -6.08872200 | 1.34863600  |
| H | -2.92528700  | -6.49863400 | 2.31114000  |

### IM8

|    |             |             |             |
|----|-------------|-------------|-------------|
| S  | -4.12918000 | -3.05838900 | 0.63318900  |
| O  | -3.20689300 | -1.77901000 | 0.36747900  |
| O  | -3.83587100 | -3.71708100 | 1.97340000  |
| C  | -3.39987000 | -4.29755400 | -0.61684400 |
| O  | -5.55954200 | -2.82316700 | 0.17429000  |
| Ni | -4.17165500 | -0.13626700 | 0.31313700  |
| F  | -4.05250700 | -5.43489300 | -0.49295800 |
| F  | -2.12027900 | -4.48246500 | -0.35272800 |
| F  | -3.54841400 | -3.83813100 | -1.84802400 |
| C  | -4.08422800 | -0.81821000 | 3.23669500  |
| C  | -5.39875600 | 1.03646700  | 2.48833500  |
| C  | -5.85555900 | 1.28424600  | 3.78475900  |
| C  | -5.39621800 | 0.48406600  | 4.82014500  |
| C  | -4.51677800 | -0.56329800 | 4.53921400  |
| H  | -3.42545200 | -1.66577900 | 3.05409700  |
| H  | -6.56615500 | 2.09240300  | 3.95492400  |
| H  | -5.73031100 | 0.65976100  | 5.84105000  |
| H  | -4.16972300 | -1.20471800 | 5.34965200  |
| C  | -5.88778600 | 1.82481400  | 1.35772900  |

|    |             |             |             |
|----|-------------|-------------|-------------|
| O  | -6.84998200 | 2.54930300  | 1.31224600  |
| N  | -5.01812500 | 1.59166800  | 0.19821700  |
| H  | -4.11070100 | 2.10640000  | 0.32820100  |
| C  | -5.49097600 | 1.85827800  | -1.13973700 |
| C  | -4.92262200 | 0.99549300  | -2.10005000 |
| C  | -6.30278800 | 2.89093400  | -1.53335300 |
| C  | -5.15098900 | 1.20417600  | -3.47773100 |
| C  | -6.57453800 | 3.06923800  | -2.91005100 |
| H  | -6.72577100 | 3.56410000  | -0.79524400 |
| C  | -3.47571700 | -0.76475200 | -2.49659800 |
| C  | -4.46905700 | 0.35382000  | -4.37331400 |
| C  | -6.00824700 | 2.26028300  | -3.86255000 |
| H  | -7.22736000 | 3.88598700  | -3.21068400 |
| C  | -3.62384200 | -0.61377400 | -3.88735000 |
| H  | -2.82500700 | -1.52179700 | -2.06187400 |
| H  | -4.61123300 | 0.48634300  | -5.44569400 |
| H  | -6.19964600 | 2.42688500  | -4.92201300 |
| H  | -3.07555000 | -1.27011200 | -4.55913000 |
| N  | -4.11971500 | -0.00308700 | -1.63639200 |
| C  | -4.50952600 | -0.00934200 | 2.17820000  |
| S  | -1.77985300 | 2.57233300  | -1.18155000 |
| O  | -2.41764100 | 2.68624900  | 0.22709100  |
| O  | -0.83922400 | 1.35209300  | -1.35944300 |
| C  | -0.54055600 | 4.02109300  | -1.20884800 |
| O  | -2.72141000 | 2.83364500  | -2.34922600 |
| H  | -2.30576900 | 0.08866900  | 1.95498600  |
| F  | 0.43527200  | 3.77583900  | -0.34307000 |
| F  | -1.15120100 | 5.13954300  | -0.88443800 |
| F  | -0.02845100 | 4.12090900  | -2.42293300 |
| C  | -1.98038500 | 1.97461100  | 3.48575000  |
| H  | -2.28669100 | 1.17183200  | 4.16877100  |
| H  | -2.88578600 | 2.34769400  | 2.98893300  |
| H  | -1.51148800 | 2.78937800  | 4.04123200  |
| C  | -1.02988200 | 1.45655200  | 2.45605100  |
| O  | 0.05472000  | 1.96917900  | 2.22528800  |
| O  | -1.38311900 | 0.37338200  | 1.77776700  |
| Ag | 0.89878500  | 0.92224500  | 0.19916800  |
| C  | 3.82196900  | 0.87583400  | -0.58238000 |
| C  | 3.74780600  | -0.42286700 | -1.07612700 |
| C  | 3.15473000  | -0.68338400 | -2.34586700 |
| C  | 2.52602500  | 0.38387200  | -3.05230100 |
| C  | 2.53889700  | 1.67977400  | -2.48812200 |
| C  | 3.19211100  | 1.92672400  | -1.30237500 |
| H  | 3.62163000  | -2.79969500 | -2.38924300 |

|   |             |             |             |
|---|-------------|-------------|-------------|
| C | 3.13600200  | -1.98106600 | -2.91937800 |
| C | 1.88712900  | 0.11623600  | -4.28768200 |
| H | 2.02496700  | 2.48635600  | -3.01171800 |
| H | 3.21382800  | 2.94019800  | -0.90010400 |
| C | 1.88545200  | -1.14980600 | -4.81415100 |
| C | 2.52011500  | -2.20646200 | -4.12390100 |
| H | 1.39657800  | 0.93930300  | -4.80733700 |
| H | 1.39389300  | -1.34520800 | -5.76595300 |
| H | 2.50486900  | -3.21154700 | -4.54297400 |
| C | 8.14851000  | -2.95941700 | -0.09973700 |
| C | 7.23198500  | -3.45202700 | 0.79406700  |
| C | 5.88520300  | -3.01485100 | 0.76556000  |
| C | 5.49590000  | -2.03701000 | -0.19620400 |
| C | 7.75690200  | -2.01154100 | -1.07102900 |
| H | 5.21965800  | -4.26806500 | 2.39583600  |
| H | 9.18060100  | -3.30490500 | -0.06928800 |
| H | 7.52313800  | -4.19350100 | 1.53850100  |
| C | 4.91573100  | -3.52106200 | 1.66198500  |
| C | 4.15517200  | -1.55788400 | -0.19821100 |
| H | 8.48826600  | -1.63413400 | -1.78340800 |
| C | 3.21898400  | -2.10426800 | 0.67251800  |
| C | 3.61462900  | -3.09241000 | 1.60671700  |
| H | 2.87673400  | -3.49585100 | 2.30041000  |
| P | 4.64939000  | 1.13334900  | 1.08223600  |
| P | 1.46537500  | -1.51184100 | 0.58933300  |
| C | 6.46323600  | -1.55942500 | -1.11632700 |
| H | 6.16058500  | -0.82387700 | -1.86081100 |
| C | 0.71835200  | -2.62115000 | -0.67585300 |
| C | -0.14383400 | -2.06165000 | -1.62208000 |
| C | 1.06040500  | -3.97467100 | -0.76268300 |
| C | -0.62849200 | -2.84932800 | -2.66311800 |
| H | -0.41629700 | -1.00342300 | -1.56428900 |
| C | 0.55335400  | -4.75981000 | -1.79076000 |
| H | 1.74074200  | -4.41227700 | -0.03056700 |
| C | -0.28710900 | -4.19450500 | -2.74633500 |
| H | -1.26908900 | -2.40349800 | -3.42381500 |
| H | 0.81872000  | -5.81416100 | -1.84908900 |
| H | -0.67557800 | -4.80562200 | -3.55998600 |
| C | 0.71342100  | -1.98150400 | 2.19650000  |
| C | 1.18492700  | -1.31552200 | 3.33566200  |
| C | -0.42323900 | -2.78507600 | 2.28851500  |
| C | 0.53059400  | -1.46084000 | 4.55130300  |
| H | 2.06176200  | -0.66690100 | 3.26274300  |
| C | -1.08036000 | -2.92568700 | 3.50991400  |

|   |             |             |             |
|---|-------------|-------------|-------------|
| H | -0.82616600 | -3.28548700 | 1.40850300  |
| C | -0.60914800 | -2.26111500 | 4.63703900  |
| H | 0.90417300  | -0.94164000 | 5.43279600  |
| H | -1.97602100 | -3.54413500 | 3.55360300  |
| H | -1.12531500 | -2.36990200 | 5.59023400  |
| C | 6.41976700  | 1.27152200  | 0.53838800  |
| C | 7.38565900  | 0.71181200  | 1.37811500  |
| C | 6.82916900  | 1.87115600  | -0.65838700 |
| C | 8.73510600  | 0.76196400  | 1.04066000  |
| H | 7.06992100  | 0.21103100  | 2.29458300  |
| C | 8.17709600  | 1.92442600  | -0.99617600 |
| H | 6.08365000  | 2.28973000  | -1.33691600 |
| C | 9.13196500  | 1.37255600  | -0.14443100 |
| H | 9.47663100  | 0.31786100  | 1.70306900  |
| H | 8.48455800  | 2.39628100  | -1.92850100 |
| H | 10.18717200 | 1.41245300  | -0.41100600 |
| C | 4.17364100  | 2.89254500  | 1.41604000  |
| C | 2.93615700  | 3.05960200  | 2.04693200  |
| C | 4.91260700  | 4.02579100  | 1.06772300  |
| C | 2.41857000  | 4.32944900  | 2.27854900  |
| H | 2.35635100  | 2.18739600  | 2.35533000  |
| C | 4.40618000  | 5.29763400  | 1.32147700  |
| H | 5.88802800  | 3.91658800  | 0.59447600  |
| C | 3.15587200  | 5.45233500  | 1.91464500  |
| H | 1.43851600  | 4.42904300  | 2.74250600  |
| H | 4.99094200  | 6.17470800  | 1.04681100  |
| H | 2.75950400  | 6.44983700  | 2.09848800  |

### IM9

|    |             |             |             |
|----|-------------|-------------|-------------|
| S  | 0.92489000  | -2.04722300 | 1.96797100  |
| O  | 0.15829600  | -0.88978600 | 1.16811600  |
| O  | 1.00087800  | -3.36520300 | 1.21674100  |
| C  | -0.43137100 | -2.28945500 | 3.28115700  |
| O  | 2.14734900  | -1.51443300 | 2.69791000  |
| Ni | 0.78174900  | -0.06110800 | -0.41501000 |
| F  | -0.08418400 | -3.26991800 | 4.08613200  |
| F  | -1.55755900 | -2.59131100 | 2.65855400  |
| F  | -0.57284800 | -1.16941900 | 3.95945600  |
| C  | -0.61896200 | -2.55305600 | -1.36131100 |
| C  | 0.30999600  | -1.01264800 | -2.95664400 |
| C  | -0.03653900 | -1.85015600 | -4.01423700 |
| C  | -0.74128100 | -3.01832500 | -3.74717300 |
| C  | -1.02767700 | -3.36314100 | -2.42927200 |
| H  | -0.71294700 | -2.94108200 | -0.34527900 |

|    |             |             |             |
|----|-------------|-------------|-------------|
| H  | 0.25771300  | -1.57976100 | -5.02780900 |
| H  | -1.04156200 | -3.67543500 | -4.56081100 |
| H  | -1.54202100 | -4.29936300 | -2.21624900 |
| C  | 1.14933500  | 0.16894100  | -3.17395600 |
| O  | 1.82809600  | 0.43412000  | -4.13354100 |
| N  | 1.09397600  | 1.02169700  | -1.98057700 |
| H  | 0.17442700  | 1.52856000  | -1.97672400 |
| C  | 2.10581800  | 2.01868600  | -1.72215700 |
| C  | 2.35268900  | 2.21218100  | -0.34444800 |
| C  | 2.73949400  | 2.80115400  | -2.65506100 |
| C  | 3.23063800  | 3.23002700  | 0.08997000  |
| C  | 3.65232500  | 3.79086800  | -2.22194000 |
| H  | 2.54314400  | 2.65370400  | -3.71200400 |
| C  | 1.85879900  | 1.56498800  | 1.82530300  |
| C  | 3.38547200  | 3.38821900  | 1.48629100  |
| C  | 3.88801400  | 4.01290900  | -0.88789300 |
| H  | 4.15938200  | 4.39628400  | -2.97014900 |
| C  | 2.69351600  | 2.57365800  | 2.34729900  |
| H  | 1.31699600  | 0.87770200  | 2.47212100  |
| H  | 4.05324100  | 4.16296300  | 1.86269200  |
| H  | 4.57790700  | 4.79173500  | -0.56499700 |
| H  | 2.78838800  | 2.67785900  | 3.42459500  |
| N  | 1.71029600  | 1.38276900  | 0.52843100  |
| C  | 0.02952500  | -1.33040500 | -1.61124600 |
| S  | -2.15132400 | 2.28640500  | -0.73455800 |
| O  | -3.15379500 | 1.34130600  | -1.46449900 |
| O  | -1.74519200 | 1.70861300  | 0.63500100  |
| C  | -3.17542400 | 3.83706000  | -0.33971200 |
| O  | -1.01112500 | 2.79210900  | -1.62983000 |
| H  | -4.49918000 | 0.82993900  | -0.52913400 |
| F  | -4.21207600 | 3.46210300  | 0.38167600  |
| F  | -3.57461800 | 4.38100500  | -1.46642900 |
| F  | -2.42412100 | 4.67622700  | 0.33785500  |
| C  | -6.37793000 | -0.99079100 | 1.36591400  |
| H  | -6.19993600 | -1.93802400 | 1.87855000  |
| H  | -7.21903800 | -1.08922200 | 0.67044800  |
| H  | -6.65041600 | -0.21650000 | 2.09227900  |
| C  | -5.15266500 | -0.56709800 | 0.62006800  |
| O  | -5.32103700 | 0.56179600  | -0.02936000 |
| O  | -4.11610200 | -1.22287900 | 0.62980700  |
| Ag | -2.01614900 | -0.70635000 | -0.18321100 |
| C  | 3.80464900  | -0.99708500 | -1.53615700 |
| C  | 3.72157200  | -1.41872500 | -0.26449400 |
| C  | 3.87374200  | -2.92402400 | -0.27932800 |

|   |            |             |             |
|---|------------|-------------|-------------|
| C | 4.00466200 | -2.21805600 | -2.40669600 |
| H | 3.50997300 | -3.45180700 | 0.60691000  |
| H | 3.88415900 | 0.03166900  | -1.88894500 |
| H | 3.69854500 | -0.81382900 | 0.64130600  |
| H | 3.76979500 | -2.09684400 | -3.47046600 |
| C | 5.45271100 | -2.70518300 | -2.11431200 |
| H | 6.19161900 | -1.90760200 | -2.26210600 |
| H | 5.71989900 | -3.53070300 | -2.78844800 |
| C | 3.20249200 | -3.26173300 | -1.61667700 |
| H | 2.12092300 | -3.07386700 | -1.60832200 |
| H | 3.39571000 | -4.29331200 | -1.94649600 |
| C | 5.36290400 | -3.18624500 | -0.64424200 |
| H | 6.04998700 | -2.65285600 | 0.02426500  |
| H | 5.58965800 | -4.25797100 | -0.56204500 |

**TS9-10**

|    |             |             |             |
|----|-------------|-------------|-------------|
| S  | 0.71272000  | -1.51396300 | 2.33268900  |
| O  | 0.49028200  | -0.39275700 | 1.25517600  |
| O  | -0.30230300 | -2.65595000 | 2.12641400  |
| C  | 0.13857500  | -0.61830800 | 3.90887400  |
| O  | 2.17492000  | -1.87299900 | 2.57358200  |
| Ni | 1.63729700  | -0.25214600 | -0.47035200 |
| F  | 0.28675900  | -1.43374200 | 4.93263700  |
| F  | -1.12047800 | -0.27694400 | 3.77032500  |
| F  | 0.89444900  | 0.45012100  | 4.07038000  |
| C  | -0.33353200 | -2.36177300 | -1.27476900 |
| C  | 0.00797900  | -0.45508600 | -2.69182900 |
| C  | -0.96158500 | -0.90908600 | -3.58569200 |
| C  | -1.65949300 | -2.07349900 | -3.29711700 |
| C  | -1.34283000 | -2.79408900 | -2.14577600 |
| H  | -0.06666400 | -2.99467200 | -0.42577400 |
| H  | -1.17281400 | -0.32483600 | -4.48074600 |
| H  | -2.44162300 | -2.42719200 | -3.96615300 |
| H  | -1.87939800 | -3.71496900 | -1.91613900 |
| C  | 0.72987500  | 0.80908700  | -2.92261600 |
| O  | 1.03706000  | 1.30144900  | -3.98451900 |
| N  | 1.11616600  | 1.35483200  | -1.65511900 |
| H  | 0.29543700  | 1.56250100  | -1.04365100 |
| C  | 2.07778100  | 2.39843500  | -1.50432500 |
| C  | 2.84973800  | 2.29137600  | -0.32063000 |
| C  | 2.23078800  | 3.48382900  | -2.33194400 |
| C  | 3.71512000  | 3.34568000  | 0.05955200  |
| C  | 3.14769000  | 4.50173600  | -1.98527700 |
| H  | 1.63903800  | 3.55264900  | -3.23965800 |

|    |             |             |             |
|----|-------------|-------------|-------------|
| C  | 3.35590300  | 1.06599100  | 1.58340400  |
| C  | 4.38530000  | 3.21523000  | 1.29672600  |
| C  | 3.85598200  | 4.45239000  | -0.81032600 |
| H  | 3.26367900  | 5.35282500  | -2.65305700 |
| C  | 4.18766600  | 2.09563600  | 2.06597100  |
| H  | 3.21717200  | 0.13408900  | 2.13717600  |
| H  | 5.04941200  | 4.01362900  | 1.62758600  |
| H  | 4.53219600  | 5.25951000  | -0.53066100 |
| H  | 4.67803800  | 1.97545400  | 3.02833300  |
| N  | 2.72736800  | 1.15224100  | 0.42612400  |
| C  | 0.34855800  | -1.16455200 | -1.52896700 |
| S  | -2.03867700 | 1.70593600  | 0.17547600  |
| O  | -2.22553800 | 0.93080000  | -1.16044400 |
| O  | -2.48058900 | 0.88207700  | 1.39667400  |
| C  | -3.32881200 | 3.09841900  | 0.07976800  |
| O  | -0.68141200 | 2.42159700  | 0.22813900  |
| H  | -3.66173600 | 0.04243900  | -1.35675200 |
| F  | -4.51368200 | 2.54537300  | -0.09023900 |
| F  | -3.04190700 | 3.87603700  | -0.94327200 |
| F  | -3.30258800 | 3.78788400  | 1.19948700  |
| C  | -6.17283600 | -1.98793800 | -1.16553400 |
| H  | -6.30218100 | -2.95324000 | -0.67190300 |
| H  | -6.32687400 | -2.08610300 | -2.24574300 |
| H  | -6.92607900 | -1.28192800 | -0.79620600 |
| C  | -4.80601900 | -1.44185400 | -0.88802300 |
| O  | -4.55896400 | -0.34546400 | -1.56759000 |
| O  | -4.03086100 | -1.97851200 | -0.10577800 |
| Ag | -1.87195900 | -1.37154700 | 0.60033500  |
| C  | 3.06455000  | -1.54835000 | -1.81391800 |
| C  | 3.81594600  | -1.28851000 | -0.70613200 |
| C  | 4.08645400  | -2.60086000 | -0.01656700 |
| C  | 2.86056000  | -3.04637600 | -1.85069000 |
| H  | 4.37060400  | -2.54923900 | 1.03821300  |
| H  | 2.97804700  | -0.90153600 | -2.68768900 |
| H  | 4.40081800  | -0.38688000 | -0.54024100 |
| H  | 2.03970200  | -3.40758600 | -2.47825900 |
| C  | 4.26279000  | -3.61228900 | -2.21867100 |
| H  | 4.66748000  | -3.15486800 | -3.13022800 |
| H  | 4.19228900  | -4.69298300 | -2.39823000 |
| C  | 2.82009500  | -3.38564400 | -0.35662800 |
| H  | 1.94085600  | -3.00538400 | 0.17353500  |
| H  | 2.92089900  | -4.46145500 | -0.16017300 |
| C  | 5.10876000  | -3.30503400 | -0.95695600 |
| H  | 5.98377000  | -2.67738700 | -1.16866000 |



|   |            |             |             |
|---|------------|-------------|-------------|
| H | 5.47313600 | -4.22639900 | -0.48409500 |
|---|------------|-------------|-------------|

**IM10**

|    |             |             |             |
|----|-------------|-------------|-------------|
| S  | 0.70644400  | -1.48621400 | 2.33572700  |
| O  | 0.49007900  | -0.37494500 | 1.24753000  |
| O  | -0.31588000 | -2.62463000 | 2.14309700  |
| C  | 0.14487900  | -0.57457700 | 3.90710000  |
| O  | 2.16609900  | -1.85761500 | 2.57610400  |
| Ni | 1.67138100  | -0.28878900 | -0.47182600 |
| F  | 0.29966700  | -1.38082400 | 4.93723500  |
| F  | -1.11440300 | -0.23344800 | 3.77413300  |
| F  | 0.90339200  | 0.49418000  | 4.05304700  |
| C  | -0.32196600 | -2.38442200 | -1.26243600 |
| C  | -0.00555800 | -0.45899800 | -2.66131200 |
| C  | -0.99630300 | -0.89834000 | -3.53889100 |
| C  | -1.69003600 | -2.06561700 | -3.25188800 |
| C  | -1.35231700 | -2.80164600 | -2.11638200 |
| H  | -0.04128500 | -3.02593700 | -0.42462200 |
| H  | -1.22783800 | -0.29953600 | -4.41916700 |
| H  | -2.48793300 | -2.40783000 | -3.90815400 |
| H  | -1.88879700 | -3.72230500 | -1.88577400 |
| C  | 0.70902900  | 0.81176500  | -2.88638600 |
| O  | 1.00766900  | 1.31143200  | -3.94763700 |
| N  | 1.10011800  | 1.34838000  | -1.61955900 |
| H  | 0.28735000  | 1.53550000  | -0.99259900 |
| C  | 2.05569800  | 2.39557900  | -1.46564800 |
| C  | 2.85186100  | 2.27304300  | -0.29946700 |
| C  | 2.18339500  | 3.49751900  | -2.27558500 |
| C  | 3.71358200  | 3.32947000  | 0.08404300  |
| C  | 3.09758400  | 4.51733900  | -1.92835100 |
| H  | 1.57276900  | 3.57762500  | -3.16982000 |
| C  | 3.40480700  | 1.02105700  | 1.57449800  |
| C  | 4.40682200  | 3.18536500  | 1.30690500  |
| C  | 3.82797000  | 4.45311400  | -0.76771600 |
| H  | 3.19307400  | 5.38165000  | -2.58225000 |
| C  | 4.23304800  | 2.05176800  | 2.06092800  |
| H  | 3.28004700  | 0.08101100  | 2.11782500  |
| H  | 5.06831200  | 3.98523400  | 1.63949800  |
| H  | 4.50137700  | 5.26160600  | -0.48523600 |
| H  | 4.73967000  | 1.92123600  | 3.01347600  |
| N  | 2.75653000  | 1.11896000  | 0.42898100  |
| C  | 0.36081500  | -1.18818400 | -1.51881400 |
| S  | -2.05936700 | 1.70387500  | 0.19480000  |
| O  | -2.24023100 | 0.93765700  | -1.14758800 |

|    |             |             |             |
|----|-------------|-------------|-------------|
| O  | -2.51162300 | 0.87012900  | 1.40550700  |
| C  | -3.34525600 | 3.10058500  | 0.10196200  |
| O  | -0.70177300 | 2.41682600  | 0.26223900  |
| H  | -3.68052400 | 0.05193700  | -1.33459000 |
| F  | -4.53149400 | 2.55339700  | -0.07687400 |
| F  | -3.05098700 | 3.88405300  | -0.91455500 |
| F  | -3.32157200 | 3.78270500  | 1.22634200  |
| C  | -6.19131900 | -1.97773200 | -1.12899800 |
| H  | -6.31305800 | -2.95035500 | -0.64792900 |
| H  | -6.36337100 | -2.05906900 | -2.20783200 |
| H  | -6.93800600 | -1.27752400 | -0.73600000 |
| C  | -4.82005400 | -1.43603500 | -0.86487200 |
| O  | -4.57998900 | -0.33448700 | -1.53877900 |
| O  | -4.03596200 | -1.98012400 | -0.09698300 |
| Ag | -1.87205800 | -1.37554700 | 0.59887600  |
| C  | 3.01414500  | -1.59403900 | -1.84609100 |
| C  | 3.78844600  | -1.28036500 | -0.76481700 |
| C  | 4.09665500  | -2.56413000 | -0.03638200 |
| C  | 2.83470200  | -3.09499300 | -1.82271800 |
| H  | 4.40615700  | -2.47161600 | 1.00850400  |
| H  | 2.90624300  | -0.98568400 | -2.74450700 |
| H  | 4.38036600  | -0.37349100 | -0.66296100 |
| H  | 2.00635400  | -3.49280100 | -2.41714600 |
| C  | 4.23836800  | -3.64768200 | -2.20564000 |
| H  | 4.61284700  | -3.21489900 | -3.14183800 |
| H  | 4.18284600  | -4.73483900 | -2.34701300 |
| C  | 2.83632700  | -3.38141100 | -0.31759200 |
| H  | 1.96295100  | -2.99864400 | 0.22034500  |
| H  | 2.96146500  | -4.44764400 | -0.08647100 |
| C  | 5.10854100  | -3.28281300 | -0.97620600 |
| H  | 5.96684100  | -2.64797700 | -1.23069400 |
| H  | 5.50050600  | -4.18091300 | -0.48124900 |

**TS10-11**

|    |             |             |             |
|----|-------------|-------------|-------------|
| S  | 0.46298100  | -1.83195800 | 1.70406800  |
| O  | 0.22795900  | -0.55700000 | 0.80588600  |
| O  | -0.23840500 | -3.04398500 | 1.06549700  |
| C  | -0.51817500 | -1.41610000 | 3.28823500  |
| O  | 1.90645300  | -1.99080800 | 2.17492500  |
| Ni | 1.88051800  | 0.36647700  | 0.10935800  |
| F  | -0.30992800 | -2.38903100 | 4.15229200  |
| F  | -1.78679000 | -1.30594100 | 3.00855700  |
| F  | -0.04196100 | -0.28162200 | 3.76575900  |
| C  | 1.22570300  | -1.60685400 | -2.03082400 |

|   |             |             |             |
|---|-------------|-------------|-------------|
| C | 0.72598700  | 0.73457600  | -2.36075900 |
| C | -0.03817900 | 0.42829000  | -3.48112300 |
| C | -0.20659500 | -0.90005600 | -3.85938900 |
| C | 0.40376900  | -1.91603000 | -3.12190500 |
| H | 1.73091500  | -2.40813900 | -1.48693800 |
| H | -0.53000100 | 1.23251200  | -4.02746800 |
| H | -0.82325300 | -1.14993300 | -4.72095000 |
| H | 0.25960900  | -2.95786400 | -3.40848800 |
| C | 0.91261800  | 2.13765600  | -1.86324900 |
| O | 1.48513600  | 3.01371500  | -2.48456800 |
| N | 0.49991200  | 2.26110100  | -0.54899800 |
| H | -0.24130400 | 1.64253100  | -0.20559200 |
| C | 0.90564300  | 3.26104900  | 0.35770600  |
| C | 1.54057500  | 2.83285800  | 1.56087400  |
| C | 0.66975700  | 4.59872100  | 0.14639500  |
| C | 1.79856500  | 3.79056500  | 2.57836500  |
| C | 0.99740800  | 5.55230000  | 1.13103300  |
| H | 0.20095600  | 4.90140200  | -0.78652700 |
| C | 2.42797200  | 1.12741000  | 2.87229500  |
| C | 2.34302900  | 3.32885400  | 3.79760200  |
| C | 1.51894200  | 5.15543600  | 2.33605800  |
| H | 0.79557300  | 6.60434500  | 0.94145200  |
| C | 2.63023500  | 1.99856600  | 3.95879200  |
| H | 2.69064300  | 0.07012400  | 2.93761300  |
| H | 2.52662600  | 4.04574500  | 4.59790700  |
| H | 1.73092400  | 5.87983200  | 3.12181600  |
| H | 3.03657700  | 1.60887800  | 4.88822000  |
| N | 1.92015900  | 1.52304900  | 1.71932700  |
| C | 1.39068500  | -0.27604100 | -1.64286500 |
| S | -2.69515900 | 0.67063400  | 0.17668000  |
| O | -2.14759800 | 0.69765500  | -1.28835700 |
| O | -3.07313300 | -0.76299000 | 0.58694500  |
| C | -4.36936700 | 1.56381300  | 0.03706500  |
| O | -1.86624600 | 1.53162100  | 1.12716200  |
| H | -3.09354200 | -0.18069300 | -2.39214200 |
| F | -5.11442700 | 0.92255100  | -0.84260800 |
| F | -4.16011800 | 2.80052300  | -0.36700100 |
| F | -4.95640200 | 1.56467500  | 1.21544300  |
| C | -4.73860000 | -2.45388400 | -4.00607200 |
| H | -4.56799900 | -3.52312700 | -4.14730600 |
| H | -4.73316200 | -1.93189400 | -4.96898500 |
| H | -5.72862000 | -2.29839300 | -3.56069300 |
| C | -3.69788500 | -1.87737100 | -3.09652900 |
| O | -3.74904400 | -0.56613700 | -3.04436100 |

|    |             |             |             |
|----|-------------|-------------|-------------|
| O  | -2.90263900 | -2.57841000 | -2.48153400 |
| Ag | -1.35668900 | -1.96495000 | -0.82939400 |
| C  | 3.43193000  | 0.30325500  | -1.43740800 |
| C  | 3.70323300  | 1.03434900  | -0.25891100 |
| C  | 4.76306600  | 0.24557300  | 0.48621100  |
| C  | 4.31959800  | -0.91914000 | -1.38665200 |
| H  | 4.87395800  | 0.47599000  | 1.55186300  |
| H  | 3.25849800  | 0.80989600  | -2.38528600 |
| H  | 3.68795600  | 2.12772500  | -0.24238300 |
| H  | 4.03462700  | -1.74457000 | -2.04711100 |
| C  | 5.73630200  | -0.34257400 | -1.65218000 |
| H  | 5.76697600  | 0.28763200  | -2.55055800 |
| H  | 6.44488000  | -1.16579900 | -1.80868800 |
| C  | 4.40312900  | -1.20016500 | 0.11575500  |
| H  | 3.46860900  | -1.55950500 | 0.56686100  |
| H  | 5.20887200  | -1.90486500 | 0.36274000  |
| C  | 6.05184700  | 0.44033600  | -0.35217700 |
| H  | 6.27343800  | 1.49975500  | -0.53435800 |
| H  | 6.91331100  | 0.00979800  | 0.17548500  |

**IM11**

|    |             |             |             |
|----|-------------|-------------|-------------|
| S  | 0.52317200  | -2.84511400 | 0.95367400  |
| O  | 0.42068300  | -1.27834200 | 0.82837100  |
| O  | -0.70330500 | -3.49526100 | 0.27265900  |
| C  | 0.23050300  | -3.08225200 | 2.82025900  |
| O  | 1.89147400  | -3.45105300 | 0.68719700  |
| Ni | 1.71180900  | -0.02457400 | -0.12473400 |
| F  | 0.32040300  | -4.36535900 | 3.09313400  |
| F  | -0.95235200 | -2.62203100 | 3.14185700  |
| F  | 1.17501500  | -2.41720600 | 3.46644300  |
| C  | 2.05515700  | -2.17862700 | -2.08805200 |
| C  | 1.12689300  | 0.02165400  | -2.48622000 |
| C  | -0.08862300 | -0.56774400 | -2.84373600 |
| C  | -0.22713800 | -1.95262800 | -2.83316700 |
| C  | 0.84156700  | -2.75614100 | -2.43762100 |
| H  | 2.86991900  | -2.81816200 | -1.75705900 |
| H  | -0.92793200 | 0.06526300  | -3.13367000 |
| H  | -1.17776300 | -2.40173400 | -3.12155000 |
| H  | 0.72064000  | -3.83511200 | -2.37293000 |
| C  | 1.25618200  | 1.52159100  | -2.42004100 |
| O  | 2.07712600  | 2.16622900  | -3.04027500 |
| N  | 0.38824100  | 2.06373500  | -1.49115000 |
| H  | -0.24616700 | 1.40979700  | -1.02670300 |
| C  | 0.78159800  | 3.10768600  | -0.62973500 |

|    |             |             |             |
|----|-------------|-------------|-------------|
| C  | 1.10387700  | 2.76571400  | 0.71721400  |
| C  | 0.80921300  | 4.42003800  | -1.03539600 |
| C  | 1.25824000  | 3.81904500  | 1.65787400  |
| C  | 1.08063900  | 5.45254200  | -0.11603900 |
| H  | 0.57838600  | 4.64142500  | -2.07489100 |
| C  | 1.35563300  | 1.17426100  | 2.39112900  |
| C  | 1.39845700  | 3.47450200  | 3.02019700  |
| C  | 1.25850000  | 5.16140900  | 1.21230900  |
| H  | 1.09360400  | 6.48484100  | -0.45882400 |
| C  | 1.40150000  | 2.15705800  | 3.39410900  |
| H  | 1.42379100  | 0.11727200  | 2.64500200  |
| H  | 1.49026500  | 4.26971400  | 3.75980500  |
| H  | 1.39705000  | 5.95351600  | 1.94746700  |
| H  | 1.47118200  | 1.85531600  | 4.43530800  |
| N  | 1.25112700  | 1.45412900  | 1.10165500  |
| C  | 2.23978300  | -0.78508700 | -2.11427000 |
| S  | -2.40639800 | 1.05300000  | 1.19120600  |
| O  | -1.98768000 | 0.95563000  | -0.32966200 |
| O  | -2.47785000 | -0.35443300 | 1.79962700  |
| C  | -4.23918800 | 1.54488000  | 1.02468800  |
| O  | -1.72655400 | 2.17068700  | 1.96026700  |
| H  | -3.09134200 | 1.00198300  | -1.61466400 |
| F  | -4.85178500 | 0.58241900  | 0.35239800  |
| F  | -4.32964600 | 2.67997200  | 0.36087600  |
| F  | -4.77142300 | 1.67017900  | 2.21966300  |
| C  | -5.08860600 | -0.37924300 | -3.73241300 |
| H  | -5.21807700 | -1.41919400 | -4.03868600 |
| H  | -4.81809200 | 0.24367800  | -4.59193900 |
| H  | -6.03612600 | 0.00886100  | -3.33975300 |
| C  | -4.03970700 | -0.27852800 | -2.67055700 |
| O  | -3.73636500 | 0.96924400  | -2.37618100 |
| O  | -3.53167000 | -1.26131400 | -2.14423700 |
| Ag | -1.94500600 | -1.56692500 | -0.38834700 |
| C  | 3.59009600  | -0.10343200 | -1.84107400 |
| C  | 3.36750000  | 0.77441300  | -0.60371100 |
| C  | 4.39503500  | 0.29343000  | 0.40489900  |
| C  | 4.73986100  | -1.01678100 | -1.39141600 |
| H  | 4.19075900  | 0.58409000  | 1.44396400  |
| H  | 3.85533500  | 0.48476700  | -2.73087400 |
| H  | 3.32171000  | 1.85894100  | -0.75844300 |
| H  | 4.85941400  | -1.92609700 | -1.99359400 |
| C  | 6.00381700  | -0.13965700 | -1.35036700 |
| H  | 6.14110300  | 0.42793800  | -2.28011100 |
| H  | 6.89511000  | -0.76609200 | -1.21674900 |

|   |            |             |             |
|---|------------|-------------|-------------|
| C | 4.46657300 | -1.21144400 | 0.10569400  |
| H | 3.54418000 | -1.76596200 | 0.33260600  |
| H | 5.29810100 | -1.70792300 | 0.62537100  |
| C | 5.76934300 | 0.76977700  | -0.11764100 |
| H | 5.76585400 | 1.83861600  | -0.36849300 |
| H | 6.54073000 | 0.61510600  | 0.64969600  |

## IM12

|    |             |             |             |
|----|-------------|-------------|-------------|
| S  | -0.82394300 | 10.13157000 | 1.04445100  |
| O  | -0.05167600 | 9.17445800  | 2.04355400  |
| O  | -0.29585600 | 11.55750500 | 0.99406000  |
| C  | -2.46264000 | 10.26874300 | 1.99581200  |
| O  | -1.17907200 | 9.44175900  | -0.28043400 |
| Ni | 1.55793600  | 8.32054700  | 1.51669800  |
| F  | -3.28389500 | 11.03797600 | 1.31021200  |
| F  | -2.21920200 | 10.80262100 | 3.17473900  |
| F  | -2.98386800 | 9.06906100  | 2.14325300  |
| C  | -2.41352600 | 6.08505000  | 2.07711700  |
| C  | -0.83828800 | 6.15514300  | 0.29320100  |
| C  | -1.89200800 | 6.24194100  | -0.61891200 |
| C  | -3.21123700 | 6.22003900  | -0.19244000 |
| C  | -3.46460300 | 6.14877100  | 1.16931900  |
| H  | -2.65749200 | 6.06873100  | 3.13561600  |
| H  | -1.66391900 | 6.33534800  | -1.68076800 |
| H  | -4.02464700 | 6.27939600  | -0.91270800 |
| H  | -4.48919600 | 6.15757000  | 1.53890700  |
| C  | 0.52933000  | 6.23156700  | -0.29711400 |
| O  | 1.34999000  | 5.30774400  | -0.26020700 |
| N  | 0.74391000  | 7.41370200  | -0.93009800 |
| H  | 0.03558900  | 8.14693900  | -0.76085400 |
| C  | 1.90369700  | 7.82580900  | -1.61256300 |
| C  | 2.45104900  | 9.08738600  | -1.25195300 |
| C  | 2.43946800  | 7.12080400  | -2.66637800 |
| C  | 3.40321200  | 9.69031800  | -2.11163400 |
| C  | 3.47196000  | 7.67789600  | -3.44742300 |
| H  | 2.02067100  | 6.14675400  | -2.91283500 |
| C  | 2.46192000  | 10.90731300 | 0.16872400  |
| C  | 3.81288500  | 11.00884000 | -1.80305200 |
| C  | 3.90811100  | 8.95756600  | -3.20981600 |
| H  | 3.89468700  | 7.10110400  | -4.26921900 |
| C  | 3.31653600  | 11.63152900 | -0.68946800 |
| H  | 2.10402800  | 11.34707400 | 1.09842300  |
| H  | 4.52227500  | 11.51025600 | -2.46226300 |
| H  | 4.66147500  | 9.41855600  | -3.84840000 |

|   |             |             |             |
|---|-------------|-------------|-------------|
| H | 3.59823000  | 12.64852200 | -0.42933800 |
| N | 2.05280100  | 9.67977800  | -0.08588600 |
| C | -1.07262800 | 6.07504700  | 1.67960700  |
| S | 4.56691800  | 7.65616700  | 2.06640200  |
| O | 5.56655200  | 6.59753800  | 1.57524000  |
| O | 3.30137700  | 7.54172700  | 1.10933300  |
| C | 5.35641700  | 9.30180400  | 1.53003700  |
| O | 4.29929800  | 7.81403700  | 3.54789300  |
| F | 4.62057000  | 10.29905700 | 1.97765100  |
| F | 5.41332100  | 9.33160400  | 0.21098400  |
| F | 6.56764500  | 9.37138100  | 2.03633400  |
| C | 0.05351500  | 5.89476300  | 2.68744200  |
| C | 1.21560200  | 6.94312900  | 2.81647900  |
| C | 1.06581800  | 7.50538900  | 4.24084400  |
| C | -0.41855200 | 5.82967100  | 4.15576800  |
| H | 1.46474900  | 8.51878100  | 4.36728800  |
| H | 0.52108300  | 4.93341000  | 2.42072500  |
| H | 2.16276300  | 6.38913100  | 2.74044800  |
| H | -1.34880900 | 5.26814500  | 4.29958100  |
| C | 0.72341300  | 5.26791100  | 5.02023300  |
| H | 1.19893600  | 4.40253800  | 4.53326700  |
| H | 0.34097800  | 4.91937500  | 5.98992500  |
| C | -0.42444100 | 7.31342400  | 4.54136100  |
| H | -1.07596900 | 7.93437900  | 3.91352000  |
| H | -0.66799800 | 7.48237500  | 5.60062400  |
| C | 1.69015300  | 6.46497700  | 5.18298500  |
| H | 2.72951200  | 6.22944400  | 4.91881000  |
| H | 1.68998700  | 6.83573300  | 6.21939200  |
| C | 4.87605000  | 3.13902600  | -1.47211600 |
| C | 4.39050400  | 2.00708300  | -0.81432700 |
| C | 3.10293500  | 1.48632800  | -1.13966000 |
| C | 2.28307600  | 2.17798500  | -2.07955600 |
| C | 2.78452000  | 3.34461100  | -2.69405100 |
| C | 4.04625000  | 3.80580200  | -2.41044500 |
| H | 3.21465300  | -0.24291600 | 0.16400600  |
| C | 2.59565000  | 0.29892100  | -0.54956500 |
| C | 0.98957700  | 1.68145200  | -2.37284900 |
| H | 2.15226900  | 3.86816700  | -3.41342700 |
| H | 4.42288800  | 4.70035800  | -2.90832300 |
| C | 0.52655900  | 0.53665600  | -1.77829500 |
| C | 1.34366400  | -0.16373400 | -0.86291400 |
| H | 0.37231700  | 2.22956700  | -3.08504200 |
| H | -0.46897500 | 0.16252300  | -2.01084800 |
| H | 0.97169100  | -1.07340300 | -0.39426300 |

|   |             |             |             |
|---|-------------|-------------|-------------|
| C | 7.77942400  | -1.90144600 | -0.58062200 |
| C | 7.74575400  | -1.36676800 | 0.68115600  |
| C | 6.87861500  | -0.29074200 | 0.98964300  |
| C | 6.05074100  | 0.25644800  | -0.03446600 |
| C | 6.93960700  | -1.38171500 | -1.58936700 |
| H | 7.44152200  | -0.17392900 | 3.07257300  |
| H | 8.44585800  | -2.73223000 | -0.80651000 |
| H | 8.37847100  | -1.76684900 | 1.47389300  |
| C | 6.80095000  | 0.24312200  | 2.29494300  |
| C | 5.19046900  | 1.35458400  | 0.26906500  |
| H | 6.96484500  | -1.81349200 | -2.58874900 |
| C | 5.09170200  | 1.80317900  | 1.58213800  |
| C | 5.91664000  | 1.24695700  | 2.58968300  |
| H | 5.84752600  | 1.62942600  | 3.60739800  |
| P | 6.59176700  | 3.76580600  | -1.04980300 |
| P | 3.82855500  | 3.08778300  | 2.01695200  |
| C | 6.10058200  | -0.32977300 | -1.32442900 |
| H | 5.45644200  | 0.06673600  | -2.10772000 |
| C | 2.28720700  | 2.09082600  | 2.18633500  |
| C | 1.11544800  | 2.56177700  | 1.59018000  |
| C | 2.26393600  | 0.88076400  | 2.89045300  |
| C | -0.07597000 | 1.85452100  | 1.73338900  |
| H | 1.13049100  | 3.47450000  | 0.99053000  |
| C | 1.07520900  | 0.17360700  | 3.02430800  |
| H | 3.18201700  | 0.48942600  | 3.33238500  |
| C | -0.09812300 | 0.66577500  | 2.45366400  |
| H | -0.98372500 | 2.23929000  | 1.27010700  |
| H | 1.06247600  | -0.76422800 | 3.57766100  |
| H | -1.02963500 | 0.11292600  | 2.56656100  |
| C | 4.27075800  | 3.59327100  | 3.73207400  |
| C | 5.34147300  | 4.48608700  | 3.86330600  |
| C | 3.56857800  | 3.19211300  | 4.87088000  |
| C | 5.69500300  | 4.97575000  | 5.11446100  |
| H | 5.87805400  | 4.82951300  | 2.97810700  |
| C | 3.92487900  | 3.68886100  | 6.12153100  |
| H | 2.72680200  | 2.50611000  | 4.78563200  |
| C | 4.98468000  | 4.58108400  | 6.24497900  |
| H | 6.51239000  | 5.68939900  | 5.19858300  |
| H | 3.35854000  | 3.38495300  | 7.00077200  |
| H | 5.25050900  | 4.97936900  | 7.22273300  |
| C | 6.75631700  | 5.27758300  | -2.13453500 |
| C | 6.56196800  | 6.52227900  | -1.51956600 |
| C | 7.15515700  | 5.24970900  | -3.47597000 |
| C | 6.77411300  | 7.70165900  | -2.22940700 |



|    |             |            |             |
|----|-------------|------------|-------------|
| H  | 6.27588400  | 6.57416200 | -0.46654900 |
| C  | 7.36048700  | 6.42927800 | -4.18395100 |
| H  | 7.33817900  | 4.29884000 | -3.97312200 |
| C  | 7.17890000  | 7.65873600 | -3.55894500 |
| H  | 6.63477500  | 8.66072200 | -1.73313600 |
| H  | 7.68262700  | 6.38461900 | -5.22358300 |
| H  | 7.36256900  | 8.58315400 | -4.10632500 |
| Ag | 3.59684300  | 5.09703900 | 0.49355300  |
| C  | 7.60957600  | 2.53391900 | -2.00330300 |
| C  | 8.82711000  | 2.14145000 | -1.44317500 |
| C  | 7.22974200  | 1.99318100 | -3.23728500 |
| C  | 9.65708000  | 1.24188900 | -2.10714400 |
| H  | 9.11916000  | 2.53805100 | -0.46976100 |
| C  | 8.06295700  | 1.10623700 | -3.90879300 |
| H  | 6.26438500  | 2.26199800 | -3.67131200 |
| C  | 9.27876400  | 0.72901300 | -3.34331500 |
| H  | 10.59970700 | 0.93844500 | -1.65433100 |
| H  | 7.75811200  | 0.69862200 | -4.87202500 |
| H  | 9.92852400  | 0.02781600 | -3.86509200 |

**TS12-13**

|    |             |             |             |
|----|-------------|-------------|-------------|
| S  | 0.60922900  | 10.98519100 | 2.20503700  |
| O  | 1.86690600  | 10.01573900 | 2.29307600  |
| O  | 0.93052900  | 12.30762900 | 1.52371700  |
| C  | 0.35972900  | 11.42460300 | 4.04160100  |
| O  | -0.63542200 | 10.20065200 | 1.77466800  |
| Ni | 1.50300100  | 8.59740700  | 0.99637100  |
| F  | -0.70520500 | 12.19307500 | 4.14397800  |
| F  | 1.42735200  | 12.06484400 | 4.46660400  |
| F  | 0.18717100  | 10.31873800 | 4.73640600  |
| C  | -2.58227500 | 4.83906300  | 1.65064900  |
| C  | -0.89395400 | 5.89417900  | 0.31641700  |
| C  | -1.73899100 | 5.89905000  | -0.79000800 |
| C  | -3.02495600 | 5.38213800  | -0.66483900 |
| C  | -3.43879800 | 4.84596500  | 0.55269900  |
| H  | -2.91740900 | 4.41911300  | 2.59880300  |
| H  | -1.39866500 | 6.29897500  | -1.74786400 |
| H  | -3.70276400 | 5.39246100  | -1.51668700 |
| H  | -4.44327600 | 4.43680100  | 0.64980400  |
| C  | 0.55549500  | 6.27017600  | 0.24490800  |
| O  | 1.37418300  | 5.37160300  | -0.09124800 |
| N  | 0.75788300  | 7.58988000  | -0.37417600 |
| H  | -0.13840900 | 8.08975800  | -0.44656600 |
| C  | 1.55061000  | 7.74070900  | -1.56756100 |

|   |             |             |             |
|---|-------------|-------------|-------------|
| C | 2.28093800  | 8.94280900  | -1.59514200 |
| C | 1.59711900  | 6.87042700  | -2.62654700 |
| C | 2.99584000  | 9.32471500  | -2.74966000 |
| C | 2.34434100  | 7.22910500  | -3.77199300 |
| H | 1.07662400  | 5.91679500  | -2.56963100 |
| C | 2.95808700  | 10.80918500 | -0.40414700 |
| C | 3.69723800  | 10.55096000 | -2.68389100 |
| C | 3.00620800  | 8.43168500  | -3.84722400 |
| H | 2.38458600  | 6.53785800  | -4.61180200 |
| C | 3.67863200  | 11.28235700 | -1.52257300 |
| H | 2.92379300  | 11.36141800 | 0.53197200  |
| H | 4.25851900  | 10.89409000 | -3.55330500 |
| H | 3.57581200  | 8.69513800  | -4.73774300 |
| H | 4.21373500  | 12.22431700 | -1.43961300 |
| N | 2.27693500  | 9.68035300  | -0.44746700 |
| C | -1.30303600 | 5.37830200  | 1.53698200  |
| S | 4.71231200  | 7.64248300  | 2.24203700  |
| O | 5.86580000  | 6.64934900  | 2.04402600  |
| O | 3.71170000  | 7.54912700  | 1.02978200  |
| C | 5.53913200  | 9.33597600  | 1.97343300  |
| O | 4.06057100  | 7.73331600  | 3.61067200  |
| F | 4.65291500  | 10.29863200 | 2.12560700  |
| F | 6.03990600  | 9.38457700  | 0.74797400  |
| F | 6.50976500  | 9.47419200  | 2.85262500  |
| C | -0.27120700 | 5.45609500  | 2.62134000  |
| C | 0.84938000  | 6.49556500  | 2.26896200  |
| C | 0.77710400  | 7.42594900  | 3.50292900  |
| C | -0.84293100 | 5.94677900  | 3.96384100  |
| H | 1.28925700  | 8.38285800  | 3.42715800  |
| H | 0.18696200  | 4.45664900  | 2.74149700  |
| H | 1.84977800  | 6.05099200  | 2.18011900  |
| H | -1.84838200 | 5.55802800  | 4.17078500  |
| C | 0.18443000  | 5.64544900  | 5.05387400  |
| H | 0.49088500  | 4.58920500  | 5.05418300  |
| H | -0.22963100 | 5.86690300  | 6.04780700  |
| C | -0.71933100 | 7.46267300  | 3.81326400  |
| H | -1.31921000 | 7.88669000  | 2.99526900  |
| H | -0.95006200 | 8.00241900  | 4.74146300  |
| C | 1.33680700  | 6.60648600  | 4.69074600  |
| H | 2.27328200  | 6.09577600  | 4.43032100  |
| H | 1.57683600  | 7.29255700  | 5.51568600  |
| C | 4.91710000  | 3.12406600  | -1.41004900 |
| C | 4.46012500  | 1.96892700  | -0.77744700 |
| C | 3.22881900  | 1.37066000  | -1.17758300 |

|   |             |             |             |
|---|-------------|-------------|-------------|
| C | 2.42072900  | 2.01904400  | -2.15738000 |
| C | 2.87781500  | 3.22624700  | -2.72778200 |
| C | 4.09599400  | 3.75467500  | -2.38178700 |
| H | 3.38583000  | -0.36555900 | 0.10958000  |
| C | 2.77217600  | 0.14241700  | -0.63321000 |
| C | 1.18647600  | 1.43748500  | -2.53615600 |
| H | 2.25236100  | 3.72337500  | -3.47171900 |
| H | 4.43804400  | 4.67555600  | -2.85585200 |
| C | 0.77029700  | 0.25370500  | -1.98467700 |
| C | 1.57674600  | -0.40128200 | -1.02742700 |
| H | 0.57702800  | 1.95082000  | -3.28055600 |
| H | -0.17950100 | -0.18665200 | -2.28357700 |
| H | 1.24200100  | -1.34190200 | -0.59289900 |
| C | 8.21909000  | -1.55509500 | -0.32754400 |
| C | 8.04288000  | -1.04204000 | 0.93154600  |
| C | 7.03867400  | -0.07679200 | 1.18764100  |
| C | 6.21994800  | 0.37908400  | 0.11291800  |
| C | 7.38933500  | -1.12810200 | -1.38752700 |
| H | 7.44860400  | 0.08720200  | 3.30280400  |
| H | 8.99278800  | -2.29851800 | -0.51249200 |
| H | 8.66785300  | -1.37317900 | 1.76139800  |
| C | 6.82016500  | 0.43937300  | 2.48425000  |
| C | 5.23673700  | 1.38267300  | 0.35832800  |
| H | 7.52894400  | -1.54318900 | -2.38442400 |
| C | 5.01960400  | 1.83128400  | 1.65774400  |
| C | 5.82496300  | 1.35221900  | 2.71833700  |
| H | 5.65687100  | 1.72753100  | 3.72720000  |
| P | 6.60193000  | 3.79934500  | -0.92430400 |
| P | 3.67632600  | 3.06863000  | 1.97542700  |
| C | 6.41678200  | -0.18548400 | -1.17327300 |
| H | 5.78312400  | 0.14349800  | -1.99559500 |
| C | 2.15737000  | 2.02211900  | 1.96146600  |
| C | 1.02059800  | 2.47614200  | 1.29003200  |
| C | 2.12154700  | 0.79193600  | 2.62929400  |
| C | -0.14679300 | 1.71442300  | 1.30297900  |
| H | 1.04847000  | 3.42303300  | 0.74461200  |
| C | 0.95472900  | 0.03768100  | 2.64232400  |
| H | 3.01266500  | 0.42526200  | 3.14227400  |
| C | -0.18188700 | 0.50094100  | 1.98046700  |
| H | -1.02807700 | 2.08217100  | 0.77719100  |
| H | 0.93124200  | -0.91532300 | 3.16900400  |
| H | -1.09573200 | -0.09172900 | 1.99235200  |
| C | 3.87240200  | 3.55140900  | 3.74255300  |
| C | 4.91287700  | 4.44037900  | 4.03782900  |

|    |             |            |             |
|----|-------------|------------|-------------|
| C  | 2.99360000  | 3.16066500 | 4.75651100  |
| C  | 5.07535400  | 4.92292100 | 5.33043800  |
| H  | 5.57333700  | 4.79813100 | 3.24591800  |
| C  | 3.16237500  | 3.64781600 | 6.04983900  |
| H  | 2.16490100  | 2.48715900 | 4.53932000  |
| C  | 4.20074400  | 4.52725400 | 6.33857900  |
| H  | 5.86967100  | 5.63827000 | 5.53475100  |
| H  | 2.46570900  | 3.34740000 | 6.83157400  |
| H  | 4.31840100  | 4.91856500 | 7.34779500  |
| C  | 6.58782500  | 5.38225100 | -1.89541500 |
| C  | 6.03762500  | 6.48507000 | -1.23175800 |
| C  | 7.01598700  | 5.53462500 | -3.21644200 |
| C  | 5.84999400  | 7.69276800 | -1.89529400 |
| H  | 5.79436800  | 6.41560900 | -0.16872400 |
| C  | 6.86321200  | 6.75497700 | -3.86932300 |
| H  | 7.47308300  | 4.69791000 | -3.74354500 |
| C  | 6.26566600  | 7.82913700 | -3.21627000 |
| H  | 5.39852800  | 8.52799500 | -1.36110900 |
| H  | 7.21126800  | 6.86405400 | -4.89594200 |
| H  | 6.14603100  | 8.78225000 | -3.73283200 |
| Ag | 3.61956500  | 5.16533500 | 0.55771700  |
| C  | 7.68169100  | 2.70727700 | -1.97306400 |
| C  | 8.91172300  | 2.32500600 | -1.43286000 |
| C  | 7.32699200  | 2.23832100 | -3.24338200 |
| C  | 9.77722400  | 1.50320600 | -2.14931700 |
| H  | 9.18259400  | 2.66304300 | -0.43158900 |
| C  | 8.19345800  | 1.42435800 | -3.96422100 |
| H  | 6.35574500  | 2.50338600 | -3.66586300 |
| C  | 9.42081400  | 1.05613500 | -3.41717500 |
| H  | 10.72973000 | 1.20717500 | -1.71238500 |
| H  | 7.90796600  | 1.06986300 | -4.95398300 |
| H  | 10.09727100 | 0.41385800 | -3.97948600 |

**IM13**

|    |             |             |            |
|----|-------------|-------------|------------|
| S  | 1.05349800  | 11.21112000 | 2.71735200 |
| O  | 2.17754100  | 10.10035400 | 2.46898400 |
| O  | 1.51811400  | 12.58710800 | 2.26838000 |
| C  | 1.05179400  | 11.25617200 | 4.62124100 |
| O  | -0.32131500 | 10.69448900 | 2.30171400 |
| Ni | 1.63591700  | 8.81131200  | 1.21620900 |
| F  | 0.17299000  | 12.15442100 | 5.01266700 |
| F  | 2.25341600  | 11.57282000 | 5.04217000 |
| F  | 0.70688500  | 10.06322400 | 5.06947700 |
| C  | -2.81999400 | 4.86057100  | 1.31103300 |

|   |             |             |             |
|---|-------------|-------------|-------------|
| C | -0.84255900 | 5.69362400  | 0.20446300  |
| C | -1.52404200 | 5.75428400  | -1.00803000 |
| C | -2.86236400 | 5.37671400  | -1.05188900 |
| C | -3.50590100 | 4.92661500  | 0.10255100  |
| H | -3.32173800 | 4.50941700  | 2.21382300  |
| H | -1.02049400 | 6.09406900  | -1.91433900 |
| H | -3.41057300 | 5.42769200  | -1.99147500 |
| H | -4.55223500 | 4.62826000  | 0.05563500  |
| C | 0.63541500  | 5.94692600  | 0.46922500  |
| O | 1.43316900  | 5.17625200  | -0.20424700 |
| N | 0.89016600  | 7.55772800  | -0.00590200 |
| H | -0.05708900 | 7.94952900  | -0.09090300 |
| C | 1.53823400  | 7.75385000  | -1.28138000 |
| C | 2.13903200  | 9.02076800  | -1.41986500 |
| C | 1.58446600  | 6.87874300  | -2.34500000 |
| C | 2.71434300  | 9.44345900  | -2.63961800 |
| C | 2.19203000  | 7.27830900  | -3.55755100 |
| H | 1.18153000  | 5.87783800  | -2.22761800 |
| C | 2.69252600  | 11.01892700 | -0.35473200 |
| C | 3.27952700  | 10.73694200 | -2.66957600 |
| C | 2.72567000  | 8.53183700  | -3.72010200 |
| H | 2.22532000  | 6.56642500  | -4.38068000 |
| C | 3.26332500  | 11.51837500 | -1.54065900 |
| H | 2.67581800  | 11.61228700 | 0.55821300  |
| H | 3.73332100  | 11.09748100 | -3.59308800 |
| H | 3.18440000  | 8.83067700  | -4.66209700 |
| H | 3.69317900  | 12.51597200 | -1.53307900 |
| N | 2.15153100  | 9.81295000  | -0.30598700 |
| C | -1.48394300 | 5.25124100  | 1.35622000  |
| S | 4.74035700  | 7.55095900  | 2.25708800  |
| O | 5.81789700  | 6.47010700  | 2.11837300  |
| O | 3.72947200  | 7.48602000  | 1.05519700  |
| C | 5.69542900  | 9.16724400  | 1.91139700  |
| O | 4.07860900  | 7.75337300  | 3.61222600  |
| F | 4.84758400  | 10.15423800 | 1.68949500  |
| F | 6.45628900  | 8.99549700  | 0.84368600  |
| F | 6.44906800  | 9.44644100  | 2.95434500  |
| C | -0.58191000 | 5.27761000  | 2.55533500  |
| C | 0.75987500  | 5.88388900  | 2.02803700  |
| C | 0.86383500  | 7.15161400  | 2.87713600  |
| C | -1.03375200 | 6.27132700  | 3.64513500  |
| H | 1.70667000  | 7.84269700  | 2.62605300  |
| H | -0.44719700 | 4.26531800  | 2.97202200  |
| H | 1.62215100  | 5.23317500  | 2.23812600  |

|   |             |             |             |
|---|-------------|-------------|-------------|
| H | -2.10074700 | 6.18925200  | 3.88929800  |
| C | -0.08814100 | 6.12191300  | 4.84191500  |
| H | 0.03283100  | 5.07109900  | 5.14214500  |
| H | -0.46702600 | 6.67355500  | 5.71253400  |
| C | -0.58637600 | 7.61487400  | 3.05307600  |
| H | -1.11029600 | 7.87745100  | 2.12450100  |
| H | -0.68375800 | 8.45926300  | 3.74524500  |
| C | 1.23125800  | 6.73608500  | 4.31879900  |
| H | 2.08484100  | 6.04618100  | 4.32942800  |
| H | 1.53240900  | 7.62240400  | 4.89027700  |
| C | 4.89294600  | 3.04716400  | -1.38367000 |
| C | 4.49453000  | 1.88040600  | -0.73210400 |
| C | 3.27591100  | 1.23563500  | -1.09911900 |
| C | 2.41831400  | 1.85234000  | -2.05738400 |
| C | 2.81105600  | 3.07723500  | -2.63688200 |
| C | 4.02003600  | 3.64758000  | -2.32938800 |
| H | 3.52633300  | -0.48928100 | 0.18944200  |
| C | 2.87789000  | -0.00723400 | -0.54123600 |
| C | 1.19706500  | 1.22516300  | -2.40399100 |
| H | 2.14125900  | 3.55485500  | -3.35387600 |
| H | 4.30888500  | 4.58380900  | -2.80893100 |
| C | 0.84039700  | 0.02662600  | -1.84311400 |
| C | 1.69465200  | -0.59612900 | -0.90614500 |
| H | 0.54917800  | 1.71663000  | -3.13035400 |
| H | -0.09962700 | -0.44944700 | -2.11746400 |
| H | 1.40586000  | -1.54758200 | -0.46216800 |
| C | 8.39664200  | -1.48854100 | -0.31934800 |
| C | 8.21335500  | -0.98244700 | 0.94173200  |
| C | 7.17457300  | -0.05756700 | 1.20855700  |
| C | 6.32757300  | 0.36477500  | 0.14201400  |
| C | 7.53908300  | -1.09612900 | -1.37056900 |
| H | 7.59535500  | 0.11980700  | 3.32070500  |
| H | 9.19755300  | -2.20052700 | -0.51223900 |
| H | 8.85970800  | -1.28852300 | 1.76484200  |
| C | 6.94755500  | 0.44926800  | 2.50776500  |
| C | 5.31115400  | 1.33206800  | 0.39537500  |
| H | 7.68432100  | -1.50594600 | -2.36884400 |
| C | 5.09145700  | 1.77578600  | 1.69690500  |
| C | 5.92144500  | 1.32497200  | 2.75063200  |
| H | 5.74755000  | 1.69491700  | 3.76073900  |
| P | 6.56560000  | 3.78529400  | -0.95008300 |
| P | 3.72753000  | 2.99038000  | 2.00171000  |
| C | 6.53171400  | -0.19343100 | -1.14582400 |
| H | 5.87542600  | 0.10874600  | -1.96064600 |

|    |             |             |             |
|----|-------------|-------------|-------------|
| C  | 2.22014700  | 1.92478400  | 2.01133500  |
| C  | 1.08335700  | 2.33458000  | 1.31154100  |
| C  | 2.19226500  | 0.73053700  | 2.74162300  |
| C  | -0.07378000 | 1.55810800  | 1.35290100  |
| H  | 1.10721000  | 3.25221000  | 0.71554900  |
| C  | 1.03466900  | -0.03635800 | 2.78418000  |
| H  | 3.08211500  | 0.40538900  | 3.28405100  |
| C  | -0.10113500 | 0.37963300  | 2.09042400  |
| H  | -0.95422100 | 1.88297500  | 0.79864000  |
| H  | 1.01740100  | -0.96151800 | 3.35862800  |
| H  | -1.00817800 | -0.22270300 | 2.12365400  |
| C  | 3.87368200  | 3.51572600  | 3.76241900  |
| C  | 4.96447700  | 4.32546200  | 4.10119700  |
| C  | 2.86375600  | 3.29798700  | 4.70558100  |
| C  | 5.04898900  | 4.89608800  | 5.36480600  |
| H  | 5.72519600  | 4.55526900  | 3.35528900  |
| C  | 2.95730800  | 3.86810900  | 5.97265800  |
| H  | 1.99464200  | 2.69141200  | 4.45145600  |
| C  | 4.04690300  | 4.66703300  | 6.30376800  |
| H  | 5.88849800  | 5.54713700  | 5.60095400  |
| H  | 2.16510200  | 3.69394400  | 6.70004700  |
| H  | 4.10791100  | 5.12534800  | 7.28947500  |
| C  | 6.45573700  | 5.37357800  | -1.90791600 |
| C  | 5.90540200  | 6.45143800  | -1.20561700 |
| C  | 6.80553700  | 5.55158500  | -3.24857600 |
| C  | 5.63781200  | 7.65917300  | -1.84326700 |
| H  | 5.72224800  | 6.35705500  | -0.13329700 |
| C  | 6.57262600  | 6.77128600  | -3.87874300 |
| H  | 7.26173100  | 4.73573700  | -3.80856300 |
| C  | 5.97461800  | 7.81951600  | -3.18346400 |
| H  | 5.19081500  | 8.47479900  | -1.27245300 |
| H  | 6.85774800  | 6.90129700  | -4.92222300 |
| H  | 5.79104200  | 8.77054400  | -3.68453600 |
| Ag | 3.60389800  | 5.05841900  | 0.52532600  |
| C  | 7.65315500  | 2.73950500  | -2.03712700 |
| C  | 8.91139400  | 2.40138900  | -1.53306700 |
| C  | 7.27787100  | 2.25600200  | -3.29595200 |
| C  | 9.78397300  | 1.60932400  | -2.27377200 |
| H  | 9.19899100  | 2.74940600  | -0.53988700 |
| C  | 8.15118000  | 1.47156400  | -4.04121500 |
| H  | 6.28505000  | 2.48406100  | -3.68883400 |
| C  | 9.40636400  | 1.14767600  | -3.53025700 |
| H  | 10.75861400 | 1.34747400  | -1.86465600 |
| H  | 7.84925600  | 1.10496300  | -5.02164500 |

|   |             |            |             |
|---|-------------|------------|-------------|
| H | 10.08797600 | 0.52826900 | -4.11172000 |
|---|-------------|------------|-------------|

**TS13-14**

|    |             |             |             |
|----|-------------|-------------|-------------|
| S  | 1.12057300  | 11.23798300 | 2.80365800  |
| O  | 2.11599800  | 10.02195700 | 2.53144200  |
| O  | 1.71623100  | 12.56890700 | 2.36825300  |
| C  | 1.15658000  | 11.25692500 | 4.70776600  |
| O  | -0.30955800 | 10.88514600 | 2.40750300  |
| Ni | 1.53782800  | 8.83041000  | 1.19210200  |
| F  | 0.38445100  | 12.23730500 | 5.12756800  |
| F  | 2.39170900  | 11.43931300 | 5.11141000  |
| F  | 0.69503000  | 10.10084200 | 5.15238100  |
| C  | -2.98275800 | 5.09702600  | 1.32779400  |
| C  | -0.91898900 | 5.62322000  | 0.19421200  |
| C  | -1.56822500 | 5.63249000  | -1.03682700 |
| C  | -2.93666600 | 5.38971600  | -1.07601400 |
| C  | -3.63917100 | 5.12196200  | 0.10174600  |
| H  | -3.53128900 | 4.87926600  | 2.24498600  |
| H  | -1.01389900 | 5.83338700  | -1.95430400 |
| H  | -3.46480700 | 5.40404700  | -2.02811500 |
| H  | -4.71006600 | 4.92913100  | 0.05729400  |
| C  | 0.55437300  | 5.77500800  | 0.47585400  |
| O  | 1.36956500  | 5.10073000  | -0.22261300 |
| N  | 0.83151500  | 7.60664200  | -0.04414100 |
| H  | -0.13198000 | 7.94140400  | -0.16669900 |
| C  | 1.51066200  | 7.79835600  | -1.29012600 |
| C  | 2.13219000  | 9.05841200  | -1.41548600 |
| C  | 1.58834000  | 6.91861100  | -2.34925700 |
| C  | 2.75261800  | 9.47325300  | -2.61387400 |
| C  | 2.23783200  | 7.31022500  | -3.54326400 |
| H  | 1.17328000  | 5.92007900  | -2.24816200 |
| C  | 2.65429500  | 11.05343200 | -0.33154100 |
| C  | 3.32642300  | 10.76344600 | -2.62474100 |
| C  | 2.78791200  | 8.55866100  | -3.69234800 |
| H  | 2.29075200  | 6.59747000  | -4.36491000 |
| C  | 3.27268800  | 11.54561800 | -1.49725700 |
| H  | 2.61265100  | 11.65135300 | 0.57893200  |
| H  | 3.81612800  | 11.12129700 | -3.53091500 |
| H  | 3.27672800  | 8.85052500  | -4.62124400 |
| H  | 3.70896000  | 12.54031100 | -1.47482900 |
| N  | 2.10239800  | 9.85177000  | -0.30110000 |
| C  | -1.61391700 | 5.35159600  | 1.36871300  |
| S  | 4.76572800  | 7.54609300  | 2.22819000  |
| O  | 5.86916100  | 6.48890500  | 2.11787800  |



|   |             |             |             |
|---|-------------|-------------|-------------|
| O | 3.75314200  | 7.42745800  | 1.02837300  |
| C | 5.67925800  | 9.18397900  | 1.83961900  |
| O | 4.09923100  | 7.75940200  | 3.57864600  |
| F | 4.81537300  | 10.10965700 | 1.46436700  |
| F | 6.54099400  | 8.97024800  | 0.86073700  |
| F | 6.31952900  | 9.57777300  | 2.91996000  |
| C | -0.71836200 | 5.36540200  | 2.57567700  |
| C | 0.67900800  | 5.79527800  | 2.02308500  |
| C | 0.91722700  | 7.10665200  | 2.77621500  |
| C | -1.05753100 | 6.46078400  | 3.60355600  |
| H | 1.83419800  | 7.64275100  | 2.42662200  |
| H | -0.68718200 | 4.37071700  | 3.05032100  |
| H | 1.47063600  | 5.07447200  | 2.28097600  |
| H | -2.12446800 | 6.50237600  | 3.85809500  |
| C | -0.11628500 | 6.30040500  | 4.80342800  |
| H | -0.08020600 | 5.26136100  | 5.16160800  |
| H | -0.44327300 | 6.92864300  | 5.64274300  |
| C | -0.48978600 | 7.71502700  | 2.92579200  |
| H | -1.00659800 | 7.96733300  | 1.99044800  |
| H | -0.50494400 | 8.60297700  | 3.56718300  |
| C | 1.24552600  | 6.77628400  | 4.24430200  |
| H | 2.04755500  | 6.03022500  | 4.31654100  |
| H | 1.60758200  | 7.68269000  | 4.74399300  |
| C | 4.90909500  | 3.07396400  | -1.39269000 |
| C | 4.50964500  | 1.90562600  | -0.74452900 |
| C | 3.29262300  | 1.26030800  | -1.11564200 |
| C | 2.43495200  | 1.88021000  | -2.07173100 |
| C | 2.82759900  | 3.10736800  | -2.64686100 |
| C | 4.03661600  | 3.67666300  | -2.33709000 |
| H | 3.54761200  | -0.47227400 | 0.16175100  |
| C | 2.89776500  | 0.01277600  | -0.56573600 |
| C | 1.21486200  | 1.25242500  | -2.42166000 |
| H | 2.15802000  | 3.58749200  | -3.36242500 |
| H | 4.32714700  | 4.61368900  | -2.81400700 |
| C | 0.86128000  | 0.04911200  | -1.86876700 |
| C | 1.71716800  | -0.57799500 | -0.93614000 |
| H | 0.56644900  | 1.74616300  | -3.14603100 |
| H | -0.07701100 | -0.42798300 | -2.14726700 |
| H | 1.43156600  | -1.53383200 | -0.49962600 |
| C | 8.43129300  | -1.43989600 | -0.32573400 |
| C | 8.24211500  | -0.93563800 | 0.93523200  |
| C | 7.19538800  | -0.01935600 | 1.20061000  |
| C | 6.34800100  | 0.39754700  | 0.13227600  |
| C | 7.57238400  | -1.05427800 | -1.37836300 |

|   |             |             |             |
|---|-------------|-------------|-------------|
| H | 7.60958800  | 0.15946400  | 3.31399000  |
| H | 9.23801400  | -2.14560400 | -0.51743400 |
| H | 8.88936700  | -1.23712700 | 1.75928700  |
| C | 6.96038500  | 0.48342100  | 2.50001500  |
| C | 5.32329700  | 1.35628600  | 0.38416600  |
| H | 7.72215100  | -1.46327300 | -2.37626500 |
| C | 5.09351200  | 1.79236100  | 1.68629300  |
| C | 5.92436400  | 1.34763400  | 2.74199400  |
| H | 5.74381600  | 1.71363400  | 3.75235000  |
| P | 6.58328300  | 3.81060200  | -0.96094600 |
| P | 3.70522900  | 2.97809100  | 1.99379400  |
| C | 6.55840200  | -0.15862300 | -1.15538700 |
| H | 5.90139800  | 0.13903500  | -1.97129400 |
| C | 2.22231300  | 1.87772900  | 2.02152700  |
| C | 1.06899200  | 2.25191800  | 1.32951800  |
| C | 2.22815600  | 0.69068400  | 2.76387400  |
| C | -0.07145600 | 1.45360800  | 1.39298300  |
| H | 1.06921500  | 3.15523700  | 0.71534100  |
| C | 1.08843000  | -0.10143300 | 2.82581100  |
| H | 3.12998300  | 0.39064900  | 3.30068100  |
| C | -0.06504100 | 0.28299300  | 2.14331300  |
| H | -0.96430700 | 1.75340700  | 0.84486300  |
| H | 1.09842000  | -1.02112400 | 3.40903100  |
| H | -0.95838200 | -0.33809700 | 2.19423000  |
| C | 3.85134100  | 3.51499600  | 3.75122400  |
| C | 4.93351500  | 4.34037900  | 4.07953700  |
| C | 2.84852600  | 3.28970700  | 4.70034800  |
| C | 5.01733700  | 4.91871700  | 5.33971500  |
| H | 5.68711000  | 4.57915400  | 3.32875900  |
| C | 2.94192600  | 3.86761000  | 5.96395500  |
| H | 1.98473200  | 2.67268800  | 4.45364400  |
| C | 4.02350500  | 4.68132300  | 6.28532600  |
| H | 5.84829100  | 5.58410400  | 5.56588000  |
| H | 2.15561400  | 3.68802400  | 6.69623300  |
| H | 4.08372900  | 5.14560100  | 7.26824900  |
| C | 6.47769400  | 5.40049500  | -1.91555600 |
| C | 5.92665800  | 6.47569700  | -1.21053000 |
| C | 6.83827900  | 5.58522600  | -3.25239600 |
| C | 5.67197500  | 7.69011100  | -1.83990800 |
| H | 5.73029300  | 6.37124300  | -0.14250500 |
| C | 6.61879100  | 6.81169400  | -3.87438700 |
| H | 7.29417100  | 4.77102800  | -3.81500100 |
| C | 6.02316100  | 7.85877900  | -3.17545900 |
| H | 5.22264200  | 8.50414900  | -1.26819700 |

|    |             |            |             |
|----|-------------|------------|-------------|
| H  | 6.91333700  | 6.94822000 | -4.91440500 |
| H  | 5.85164300  | 8.81518100 | -3.67041900 |
| Ag | 3.57261700  | 5.06585900 | 0.55594800  |
| C  | 7.66859700  | 2.76732300 | -2.05245800 |
| C  | 8.92986800  | 2.43270700 | -1.55370900 |
| C  | 7.29140900  | 2.28750300 | -3.31209600 |
| C  | 9.80337400  | 1.64713600 | -2.30022800 |
| H  | 9.21952400  | 2.77894300 | -0.56051200 |
| C  | 8.16534900  | 1.50901200 | -4.06285500 |
| H  | 6.29714700  | 2.51477400 | -3.70183500 |
| C  | 9.42352500  | 1.18835800 | -3.55709000 |
| H  | 10.78069400 | 1.38840700 | -1.89553100 |
| H  | 7.86204300  | 1.14533600 | -5.04394500 |
| H  | 10.10592800 | 0.57427000 | -4.14324700 |

#### IM14

|    |             |             |             |
|----|-------------|-------------|-------------|
| S  | 2.59114600  | 10.94458600 | 2.97301300  |
| O  | 3.71574200  | 10.37830000 | 1.98777500  |
| O  | 2.43339700  | 12.44908600 | 2.79138000  |
| C  | 3.39204900  | 10.78315800 | 4.72711800  |
| O  | 1.35327600  | 10.05653400 | 2.98900300  |
| Ni | 3.04020900  | 9.37945000  | 0.50172600  |
| F  | 2.96059700  | 11.81089300 | 5.43334200  |
| F  | 4.70093800  | 10.83299800 | 4.62567000  |
| F  | 3.00425300  | 9.66727400  | 5.29884100  |
| C  | -2.88429500 | 4.58324800  | 1.24957300  |
| C  | -0.77554700 | 5.06682900  | 0.19357400  |
| C  | -1.31098700 | 4.87016400  | -1.07886400 |
| C  | -2.65179400 | 4.53017500  | -1.17596400 |
| C  | -3.42797900 | 4.39232400  | -0.01718100 |
| H  | -3.50051300 | 4.46614700  | 2.14093100  |
| H  | -0.67929700 | 4.99089800  | -1.95816500 |
| H  | -3.10968000 | 4.37441400  | -2.15103600 |
| H  | -4.48028700 | 4.12758500  | -0.11298200 |
| C  | 0.60416600  | 5.39168900  | 0.55582900  |
| O  | 1.55120600  | 5.47389300  | -0.23011000 |
| N  | 2.31700600  | 8.39248000  | -0.86903700 |
| H  | 2.42918500  | 7.38411500  | -0.93686700 |
| C  | 2.04947500  | 9.08592200  | -1.99125900 |
| C  | 2.14681500  | 10.49773000 | -1.81918700 |
| C  | 1.69248900  | 8.62207800  | -3.25910100 |
| C  | 1.84925700  | 11.41360500 | -2.85072700 |
| C  | 1.39432600  | 9.53539800  | -4.28484200 |
| H  | 1.63601000  | 7.54890500  | -3.44112300 |

|   |             |             |             |
|---|-------------|-------------|-------------|
| C | 2.72688700  | 12.17532700 | -0.31520800 |
| C | 2.00836300  | 12.78166300 | -2.53415600 |
| C | 1.45648700  | 10.90370800 | -4.11001500 |
| H | 1.10801500  | 9.13964400  | -5.25937300 |
| C | 2.44186600  | 13.15481600 | -1.28481800 |
| H | 3.04653300  | 12.44502200 | 0.68898000  |
| H | 1.78900100  | 13.53202200 | -3.29432800 |
| H | 1.23321100  | 11.59170500 | -4.92360000 |
| H | 2.56936000  | 14.20154800 | -1.02094100 |
| N | 2.57739700  | 10.88606300 | -0.58241000 |
| C | -1.53792600 | 4.91840200  | 1.35611100  |
| S | 4.83958000  | 7.63647000  | 2.35082100  |
| O | 5.45184700  | 6.23238300  | 2.14020800  |
| O | 3.74061500  | 7.73755800  | 1.20149000  |
| C | 6.29970700  | 8.82565400  | 1.80509900  |
| O | 4.41011800  | 8.02068600  | 3.74875200  |
| F | 6.46974600  | 9.74703900  | 2.71448800  |
| F | 6.02524400  | 9.35882400  | 0.63141100  |
| F | 7.37834700  | 8.07892100  | 1.70298100  |
| C | -0.71978400 | 5.14818100  | 2.59727900  |
| C | 0.68098000  | 5.53701300  | 2.05139700  |
| C | 0.85732400  | 6.99895900  | 2.53829100  |
| C | -1.12262900 | 6.38744900  | 3.42116800  |
| H | 1.58114100  | 7.57679900  | 1.95805200  |
| H | -0.69845200 | 4.23774000  | 3.21825500  |
| H | 1.50086300  | 4.90735900  | 2.43413100  |
| H | -2.19317600 | 6.41813200  | 3.66432400  |
| C | -0.18723000 | 6.45403200  | 4.64213400  |
| H | -0.11103900 | 5.48146400  | 5.15201900  |
| H | -0.56619600 | 7.17677700  | 5.37634100  |
| C | -0.57919800 | 7.52585500  | 2.55173300  |
| H | -1.04479200 | 7.59263100  | 1.55870600  |
| H | -0.63441000 | 8.51172600  | 3.02904200  |
| C | 1.16425100  | 6.92138700  | 4.03685500  |
| H | 2.00060200  | 6.24185800  | 4.25923300  |
| H | 1.44889800  | 7.91745400  | 4.39505000  |
| C | 4.63140100  | 2.69582700  | -1.29724100 |
| C | 4.36484000  | 1.53327400  | -0.57640900 |
| C | 3.26803600  | 0.69673900  | -0.94875600 |
| C | 2.41063000  | 1.09717700  | -2.01532500 |
| C | 2.66135300  | 2.32346900  | -2.66894400 |
| C | 3.74065600  | 3.09615600  | -2.32556900 |
| H | 3.63020300  | -0.84234600 | 0.53449600  |
| C | 2.98736100  | -0.52609600 | -0.28591100 |

|   |             |             |             |
|---|-------------|-------------|-------------|
| C | 1.32068500  | 0.27131200  | -2.38250200 |
| H | 1.98732700  | 2.64290800  | -3.46477200 |
| H | 3.91842800  | 4.03281700  | -2.85235900 |
| C | 1.07659400  | -0.90393100 | -1.72022000 |
| C | 1.91995500  | -1.30221900 | -0.65975400 |
| H | 0.67889000  | 0.59389600  | -3.20301500 |
| H | 0.23581800  | -1.53270500 | -2.00863800 |
| H | 1.71934400  | -2.23357900 | -0.13238900 |
| C | 8.48063400  | -1.50764500 | 0.17112600  |
| C | 8.20649200  | -0.95606600 | 1.39582000  |
| C | 7.10389500  | -0.08462800 | 1.56796800  |
| C | 6.28171200  | 0.23277500  | 0.44706200  |
| C | 7.65167500  | -1.21882900 | -0.93454000 |
| H | 7.41208300  | 0.20906100  | 3.68635900  |
| H | 9.33173400  | -2.17549400 | 0.04925000  |
| H | 8.83002800  | -1.18116200 | 2.26143000  |
| C | 6.79007100  | 0.46823700  | 2.82916000  |
| C | 5.19932500  | 1.14991000  | 0.60629000  |
| H | 7.86958200  | -1.66347800 | -1.90428900 |
| C | 4.91431100  | 1.66036900  | 1.87025800  |
| C | 5.71590400  | 1.30461500  | 2.98112200  |
| H | 5.48025100  | 1.71139100  | 3.96336500  |
| P | 6.14494800  | 3.70106800  | -0.83463600 |
| P | 3.51810900  | 2.86123800  | 2.05842300  |
| C | 6.57975400  | -0.37409200 | -0.79968900 |
| H | 5.94651700  | -0.15458400 | -1.65753600 |
| C | 2.01515000  | 1.80365600  | 1.93599000  |
| C | 1.03444500  | 2.10679700  | 0.99087700  |
| C | 1.84105800  | 0.70009200  | 2.77870200  |
| C | -0.12080400 | 1.33429900  | 0.90450500  |
| H | 1.18901300  | 2.93496300  | 0.29681200  |
| C | 0.68519700  | -0.06642900 | 2.69641500  |
| H | 2.61405300  | 0.44677800  | 3.50639400  |
| C | -0.29824500 | 0.25401100  | 1.76191300  |
| H | -0.87615100 | 1.57945400  | 0.15836500  |
| H | 0.55190800  | -0.91971000 | 3.35961700  |
| H | -1.20285100 | -0.34878800 | 1.69736200  |
| C | 3.53633700  | 3.40986200  | 3.82080100  |
| C | 4.62756600  | 4.18391700  | 4.23929000  |
| C | 2.44108000  | 3.25997000  | 4.67755000  |
| C | 4.62994900  | 4.77557500  | 5.49581600  |
| H | 5.46225500  | 4.36270200  | 3.56146800  |
| C | 2.44904500  | 3.85609300  | 5.93627100  |
| H | 1.56972500  | 2.68620300  | 4.36315500  |

|    |             |            |             |
|----|-------------|------------|-------------|
| C  | 3.54041100  | 4.61282300 | 6.34758900  |
| H  | 5.47513600  | 5.39208100 | 5.79506400  |
| H  | 1.58870500  | 3.73444000 | 6.59303900  |
| H  | 3.53646600  | 5.09042300 | 7.32565000  |
| C  | 5.96571000  | 5.18066900 | -1.94527900 |
| C  | 5.57095400  | 6.36979100 | -1.32132100 |
| C  | 6.13453300  | 5.18129800 | -3.33465800 |
| C  | 5.27273200  | 7.51017800 | -2.06619100 |
| H  | 5.53792100  | 6.41807800 | -0.23081500 |
| C  | 5.85435300  | 6.32225200 | -4.07824500 |
| H  | 6.48145300  | 4.28184500 | -3.84276600 |
| C  | 5.40194900  | 7.48176000 | -3.44933700 |
| H  | 4.93724700  | 8.41338700 | -1.55711800 |
| H  | 5.98266300  | 6.30473000 | -5.15979900 |
| H  | 5.16010700  | 8.36667200 | -4.03609600 |
| Ag | 3.72301000  | 5.07187500 | 0.80514800  |
| C  | 7.45438200  | 2.70611900 | -1.70175000 |
| C  | 8.70546100  | 2.62806800 | -1.08488800 |
| C  | 7.25400600  | 2.03147600 | -2.91141800 |
| C  | 9.74183900  | 1.90780200 | -1.67182800 |
| H  | 8.86120100  | 3.12832200 | -0.12807000 |
| C  | 8.29112200  | 1.31970300 | -3.50364400 |
| H  | 6.26965700  | 2.04335000 | -3.38330200 |
| C  | 9.53717200  | 1.25787900 | -2.88459000 |
| H  | 10.71017500 | 1.85079900 | -1.17717800 |
| H  | 8.12391900  | 0.80334500 | -4.44820200 |
| H  | 10.34767000 | 0.69530000 | -3.34570600 |

**TS3-15**

|   |             |             |             |
|---|-------------|-------------|-------------|
| H | -2.07863800 | 1.50738100  | 1.42703100  |
| S | -1.73189800 | -2.40643700 | 0.75143500  |
| O | -0.44844300 | -1.88847900 | 0.02140900  |
| O | -2.55898100 | -1.28917100 | 1.39968700  |
| C | -0.99609200 | -3.35732300 | 2.22886700  |
| O | -2.44213800 | -3.48010200 | -0.06272000 |
| F | -0.52301200 | -2.49611500 | 3.11574300  |
| F | -0.01911400 | -4.13457000 | 1.79761200  |
| F | -1.94045200 | -4.08725100 | 2.78572000  |
| C | -1.52492900 | 0.33748600  | 4.33175400  |
| H | -0.61815200 | 0.01577800  | 4.84946500  |
| H | -2.22754200 | -0.50336000 | 4.26558000  |
| H | -2.02453600 | 1.14623800  | 4.87504300  |
| C | -1.20669200 | 0.75379000  | 2.93429600  |
| O | -2.20984400 | 1.43548800  | 2.39289200  |

|    |             |             |             |
|----|-------------|-------------|-------------|
| O  | -0.16807900 | 0.49735000  | 2.35247800  |
| Ag | 0.52523800  | 0.08248800  | 0.02713800  |
| C  | 3.34662700  | -1.33688000 | 0.54455900  |
| C  | 3.55710500  | -0.08428100 | 1.11585000  |
| C  | 3.15086700  | 0.17978900  | 2.45963500  |
| C  | 2.56217900  | -0.86803300 | 3.22439500  |
| C  | 2.38508800  | -2.13434500 | 2.62612500  |
| C  | 2.74000300  | -2.35727900 | 1.32224100  |
| H  | 3.74102500  | 2.26810200  | 2.48632800  |
| C  | 3.30344300  | 1.45418500  | 3.06426000  |
| C  | 2.15710300  | -0.61393400 | 4.55578100  |
| H  | 1.92239100  | -2.93116500 | 3.20681000  |
| H  | 2.53504100  | -3.32885800 | 0.87328000  |
| C  | 2.31560000  | 0.62959300  | 5.11216000  |
| C  | 2.88978000  | 1.67376800  | 4.35400700  |
| H  | 1.70429100  | -1.42943000 | 5.12194800  |
| H  | 1.99821400  | 0.81750900  | 6.13693200  |
| H  | 3.00754700  | 2.66045200  | 4.79900100  |
| C  | 8.55225000  | 1.03148300  | 0.89216700  |
| C  | 7.94813600  | 1.94969900  | 0.07233600  |
| C  | 6.54334300  | 1.95115500  | -0.09967600 |
| C  | 5.75062000  | 0.98807100  | 0.58896000  |
| C  | 7.77169000  | 0.07730200  | 1.57873700  |
| H  | 6.51615300  | 3.61743700  | -1.47838600 |
| H  | 9.63387300  | 1.03605700  | 1.01646700  |
| H  | 8.53762500  | 2.69484100  | -0.46239000 |
| C  | 5.90633800  | 2.88352600  | -0.95102300 |
| C  | 4.33116900  | 0.96578700  | 0.39218600  |
| H  | 8.25599100  | -0.65485600 | 2.22259400  |
| C  | 3.74447600  | 1.90923700  | -0.43736800 |
| C  | 4.54916200  | 2.86313200  | -1.11599900 |
| H  | 4.07764200  | 3.58019900  | -1.78719200 |
| P  | 3.86745100  | -1.61006500 | -1.23822700 |
| P  | 1.92022900  | 1.95490200  | -0.71861000 |
| C  | 6.40754300  | 0.05823100  | 1.43592400  |
| H  | 5.81731900  | -0.68724100 | 1.96597300  |
| C  | 1.30836000  | 3.41930900  | 0.20652700  |
| C  | -0.08046800 | 3.52348100  | 0.33134100  |
| C  | 2.12354200  | 4.39233600  | 0.78728900  |
| C  | -0.66134000 | 4.58184100  | 1.01818000  |
| H  | -0.71935100 | 2.76803300  | -0.13428300 |
| C  | 1.54485600  | 5.44618600  | 1.49045400  |
| H  | 3.20825100  | 4.32576800  | 0.69604800  |
| C  | 0.16044200  | 5.54130700  | 1.60619600  |

|    |             |             |             |
|----|-------------|-------------|-------------|
| H  | -1.74883200 | 4.64494700  | 1.09122400  |
| H  | 2.18280000  | 6.19977900  | 1.94965900  |
| H  | -0.28246600 | 6.36863300  | 2.15813800  |
| C  | 1.85144800  | 2.44249300  | -2.49473000 |
| C  | 2.07935700  | 1.43926500  | -3.44189700 |
| C  | 1.65734000  | 3.75941900  | -2.91400100 |
| C  | 2.12690300  | 1.75652100  | -4.79501400 |
| H  | 2.23968800  | 0.40884900  | -3.11304700 |
| C  | 1.70598300  | 4.07317400  | -4.26975300 |
| H  | 1.46823100  | 4.54129000  | -2.17695600 |
| C  | 1.94164800  | 3.07413800  | -5.21019400 |
| H  | 2.31342400  | 0.97304500  | -5.52815800 |
| H  | 1.55769300  | 5.10285800  | -4.59189100 |
| H  | 1.98089000  | 3.32198200  | -6.26969100 |
| C  | 3.01960200  | -3.22377600 | -1.57718700 |
| C  | 1.62414700  | -3.17290200 | -1.67229900 |
| C  | 3.65688900  | -4.45913700 | -1.71354700 |
| C  | 0.87189000  | -4.33280100 | -1.81331200 |
| H  | 1.09913600  | -2.22088800 | -1.57874300 |
| C  | 2.90752800  | -5.61760000 | -1.90492800 |
| H  | 4.74305300  | -4.52428600 | -1.65934000 |
| C  | 1.51749600  | -5.56116400 | -1.93507300 |
| H  | -0.21668600 | -4.26883200 | -1.81001200 |
| H  | 3.41609200  | -6.57508400 | -2.01123700 |
| H  | 0.93650700  | -6.47470600 | -2.05125000 |
| C  | 5.63655900  | -2.10677900 | -0.96470600 |
| C  | 6.61340500  | -1.47892500 | -1.74035100 |
| C  | 6.03585800  | -3.02651700 | 0.01249500  |
| C  | 7.96292000  | -1.76327000 | -1.54908300 |
| H  | 6.30905900  | -0.74377200 | -2.48746500 |
| C  | 7.38150300  | -3.32235000 | 0.19502000  |
| H  | 5.28435900  | -3.50684700 | 0.64110500  |
| C  | 8.34687300  | -2.68959500 | -0.58577100 |
| H  | 8.71517200  | -1.25668800 | -2.15181500 |
| H  | 7.68025700  | -4.04431300 | 0.95398300  |
| H  | 9.40178900  | -2.91591800 | -0.43643600 |
| S  | -6.51526400 | -1.62523600 | -0.59166400 |
| O  | -7.36298800 | -2.76621700 | -0.09038300 |
| O  | -7.05657200 | -0.15688200 | -0.29233900 |
| C  | -6.54138100 | -1.69043600 | -2.50198200 |
| O  | -4.98893100 | -1.64794900 | -0.24250500 |
| Ni | -4.24690200 | 0.16465200  | -0.06504000 |
| C  | -5.73721700 | 1.78617100  | 4.05748100  |
| C  | -5.07247400 | 2.07974000  | 1.77637500  |



|   |             |             |             |
|---|-------------|-------------|-------------|
| C | -5.31614300 | 0.72122800  | 1.49771600  |
| C | -5.70899500 | -0.10752300 | 2.55661600  |
| C | -5.92082400 | 0.42321700  | 3.82669300  |
| H | -5.91497100 | 2.19471400  | 5.05164700  |
| H | -6.18170000 | 0.36096300  | 0.43692600  |
| H | -5.86758100 | -1.17321500 | 2.38206600  |
| H | -6.23622400 | -0.22645800 | 4.64197000  |
| C | -4.34288400 | 2.84884300  | 0.73474500  |
| O | -4.15139200 | 4.06168700  | 0.76143000  |
| N | -3.82533500 | 1.96994900  | -0.18340000 |
| C | -3.06725700 | 2.31553200  | -1.28955000 |
| C | -2.60388400 | 1.17968700  | -2.01057800 |
| C | -2.71392200 | 3.57542100  | -1.75072800 |
| C | -1.74675200 | 1.30268700  | -3.12627300 |
| C | -1.88164800 | 3.69433700  | -2.88333200 |
| H | -3.07094700 | 4.45395000  | -1.22312100 |
| C | -2.65239500 | -1.14037300 | -2.16812200 |
| C | -1.29732300 | 0.09856900  | -3.71956200 |
| C | -1.39142500 | 2.60024400  | -3.55812500 |
| H | -1.60430200 | 4.69353900  | -3.21890000 |
| C | -1.74046800 | -1.11081100 | -3.24249500 |
| H | -3.04574700 | -2.07614800 | -1.76885300 |
| H | -0.60277300 | 0.15091500  | -4.55872600 |
| H | -0.72720800 | 2.71374500  | -4.41383900 |
| H | -1.40909000 | -2.04945100 | -3.67961600 |
| N | -3.04836000 | -0.03343400 | -1.56648400 |
| C | -5.30012800 | 2.62095000  | 3.03260000  |
| H | -5.08307700 | 3.67488900  | 3.20184000  |
| F | -5.93635200 | -2.79737500 | -2.86868500 |
| F | -7.78958400 | -1.68251800 | -2.90529600 |
| F | -5.89560000 | -0.64245800 | -2.96421500 |

#### TS15-16

|    |             |             |             |
|----|-------------|-------------|-------------|
| Ni | -4.35879900 | 0.12900300  | -0.66687900 |
| C  | -5.78195400 | -2.23468600 | 0.76972600  |
| C  | -5.33613300 | -0.14351500 | 1.93581100  |
| C  | -5.75219600 | -0.73259300 | 3.12004300  |
| C  | -6.15519800 | -2.06943700 | 3.14384400  |
| C  | -6.13056300 | -2.83094500 | 1.97578000  |
| H  | -5.77184500 | -2.80605700 | -0.15371700 |
| H  | -5.72587600 | -0.13445000 | 4.03015300  |
| H  | -6.46939500 | -2.52281300 | 4.08342400  |
| H  | -6.41489300 | -3.88228200 | 1.99974400  |
| C  | -4.72490000 | 1.23658000  | 1.98368500  |

|    |             |             |             |
|----|-------------|-------------|-------------|
| O  | -4.54493300 | 1.91397500  | 2.99895600  |
| N  | -4.26753000 | 1.50206100  | 0.73217700  |
| H  | -1.89786800 | -0.62040000 | 1.10428700  |
| C  | -3.45008700 | 2.52504100  | 0.34191400  |
| C  | -2.59457800 | 2.22651600  | -0.79698800 |
| C  | -3.37413500 | 3.81464300  | 0.86377000  |
| C  | -1.78027800 | 3.22983600  | -1.39035300 |
| C  | -2.56746300 | 4.79860500  | 0.25744800  |
| H  | -3.97676100 | 4.05449500  | 1.73590000  |
| C  | -1.78945800 | 0.59772000  | -2.25992700 |
| C  | -0.98680700 | 2.84458800  | -2.49347000 |
| C  | -1.79297600 | 4.53798600  | -0.85078700 |
| H  | -2.57008300 | 5.80319100  | 0.68083500  |
| C  | -0.96596100 | 1.53152300  | -2.91450600 |
| H  | -1.82587800 | -0.44732800 | -2.56839700 |
| H  | -0.38558900 | 3.59943400  | -3.00181300 |
| H  | -1.17689000 | 5.31059600  | -1.31058700 |
| H  | -0.35963100 | 1.21858000  | -3.76334200 |
| N  | -2.59151500 | 0.94130800  | -1.26594600 |
| C  | -5.42499500 | -0.88647600 | 0.72416900  |
| S  | -2.17392100 | -2.94598100 | -0.29170200 |
| O  | -1.24116000 | -1.69911100 | -0.26228700 |
| O  | -3.64063400 | -2.55199400 | 0.09145000  |
| C  | -1.69250800 | -3.92142000 | 1.27860400  |
| O  | -2.00612600 | -3.92961600 | -1.43389300 |
| F  | -1.65036000 | -3.10553200 | 2.31355500  |
| F  | -0.49706000 | -4.46944600 | 1.10346300  |
| F  | -2.58375500 | -4.86651300 | 1.47219400  |
| C  | -1.43394000 | 1.31402000  | 3.60401000  |
| H  | -0.58622000 | 1.95963500  | 3.85048600  |
| H  | -1.62156900 | 0.60790600  | 4.42230900  |
| H  | -2.36230600 | 1.89110700  | 3.47056100  |
| C  | -1.15640000 | 0.56713200  | 2.34535600  |
| O  | -2.12832700 | -0.24753200 | 1.99114900  |
| O  | -0.13315500 | 0.69830600  | 1.68121100  |
| Ag | 0.55826000  | 0.05906200  | -0.54882200 |
| C  | 2.94358500  | -1.38516800 | 0.26228900  |
| C  | 3.36483600  | -0.32193000 | 1.05800100  |
| C  | 2.85305400  | -0.15299500 | 2.37598300  |
| C  | 1.92585000  | -1.10781900 | 2.88665200  |
| C  | 1.51972800  | -2.17754200 | 2.06132900  |
| C  | 1.98878500  | -2.30082800 | 0.77798400  |
| H  | 3.92248200  | 1.68107100  | 2.81574700  |
| C  | 3.21333200  | 0.94653900  | 3.19516700  |

|   |             |             |             |
|---|-------------|-------------|-------------|
| C | 1.39919100  | -0.93596900 | 4.18882200  |
| H | 0.81273000  | -2.90829200 | 2.44479000  |
| H | 1.62271900  | -3.11284200 | 0.14813800  |
| C | 1.75211400  | 0.14953500  | 4.94899800  |
| C | 2.66344500  | 1.10314500  | 4.44204400  |
| H | 0.68858200  | -1.67442500 | 4.56285000  |
| H | 1.32781200  | 0.28284800  | 5.94298300  |
| H | 2.93677700  | 1.96511900  | 5.04868500  |
| C | 8.49988800  | -0.31308800 | 0.89965100  |
| C | 8.11387000  | 0.77649800  | 0.16170200  |
| C | 6.74546900  | 1.11621000  | 0.03485600  |
| C | 5.76350100  | 0.30955900  | 0.67965800  |
| C | 7.53090100  | -1.10656100 | 1.55099500  |
| H | 7.08055100  | 2.85268400  | -1.20789800 |
| H | 9.55478000  | -0.56724600 | 0.98919400  |
| H | 8.85320600  | 1.40091100  | -0.34052600 |
| C | 6.32567900  | 2.23357000  | -0.72234900 |
| C | 4.37993200  | 0.62029100  | 0.50826400  |
| H | 7.84408900  | -1.96864800 | 2.13713900  |
| C | 4.00471700  | 1.73109400  | -0.23348000 |
| C | 4.99641800  | 2.53908000  | -0.84567600 |
| H | 4.69397900  | 3.40783200  | -1.42914300 |
| P | 3.69907600  | -1.54802900 | -1.44792900 |
| P | 2.20867300  | 2.13599200  | -0.44115600 |
| C | 6.19738700  | -0.80290400 | 1.44578200  |
| H | 5.45572100  | -1.42468000 | 1.94498400  |
| C | 1.89031900  | 3.31396500  | 0.94620800  |
| C | 0.57696200  | 3.53978000  | 1.36441100  |
| C | 2.93326400  | 4.01716600  | 1.56026400  |
| C | 0.31312700  | 4.43671900  | 2.39537000  |
| H | -0.25173700 | 3.01132600  | 0.89512100  |
| C | 2.66777300  | 4.90469300  | 2.59677100  |
| H | 3.96214700  | 3.86394700  | 1.23311400  |
| C | 1.35704900  | 5.11027300  | 3.02041800  |
| H | -0.71800500 | 4.59439600  | 2.71104300  |
| H | 3.48785000  | 5.44049600  | 3.07238000  |
| H | 1.14975500  | 5.80244500  | 3.83507100  |
| C | 2.23398700  | 3.23756600  | -1.92297200 |
| C | 2.48166800  | 2.64899400  | -3.16902100 |
| C | 1.94690500  | 4.60184600  | -1.85691900 |
| C | 2.43854900  | 3.41196300  | -4.32902800 |
| H | 2.71853000  | 1.58332000  | -3.22560100 |
| C | 1.89577000  | 5.36406500  | -3.02290400 |
| H | 1.75102800  | 5.07221400  | -0.89325100 |

|   |             |             |             |
|---|-------------|-------------|-------------|
| C | 2.13712900  | 4.77189000  | -4.25804600 |
| H | 2.63708300  | 2.94517800  | -5.29244400 |
| H | 1.66640000  | 6.42691800  | -2.96198000 |
| H | 2.09348300  | 5.36830000  | -5.16769800 |
| C | 2.40998700  | -2.60739700 | -2.24569900 |
| C | 1.36885700  | -1.91018400 | -2.87481400 |
| C | 2.37199100  | -4.00235300 | -2.23785800 |
| C | 0.28538200  | -2.58706500 | -3.42336300 |
| H | 1.42805400  | -0.81891200 | -2.95942200 |
| C | 1.29408600  | -4.67985800 | -2.80203400 |
| H | 3.18684100  | -4.56499700 | -1.78178500 |
| C | 0.24321400  | -3.97619900 | -3.38007300 |
| H | -0.52055000 | -2.03092000 | -3.89954500 |
| H | 1.26989300  | -5.76813700 | -2.77875500 |
| H | -0.61172700 | -4.50681500 | -3.79152800 |
| C | 5.09545500  | -2.70937400 | -1.06173000 |
| C | 6.30923100  | -2.45925800 | -1.70790800 |
| C | 5.03056200  | -3.74850000 | -0.12607600 |
| C | 7.43105300  | -3.23814400 | -1.44095300 |
| H | 6.37731600  | -1.62704700 | -2.41017000 |
| C | 6.14835300  | -4.53295200 | 0.13569200  |
| H | 4.10378400  | -3.93543900 | 0.41839400  |
| C | 7.34977600  | -4.27951300 | -0.52268600 |
| H | 8.37170900  | -3.02606700 | -1.94694300 |
| H | 6.08407100  | -5.34125200 | 0.86281600  |
| H | 8.22586200  | -4.89119000 | -0.31204700 |
| C | -6.57851200 | -0.05296600 | -0.36833000 |
| C | -5.95164500 | 0.67939100  | -1.44059000 |
| C | -6.54618700 | 0.14843400  | -2.72995400 |
| C | -7.63759400 | -0.92880900 | -1.08173500 |
| H | -5.95764900 | 0.29561000  | -3.64167100 |
| H | -7.05452800 | 0.63389800  | 0.34315000  |
| H | -6.02784000 | 1.77406700  | -1.35138900 |
| H | -8.05780200 | -1.75976200 | -0.50324400 |
| C | -8.69413400 | 0.04448400  | -1.64166200 |
| H | -9.06727400 | 0.73098000  | -0.86906100 |
| H | -9.55866600 | -0.51624700 | -2.02126500 |
| C | -6.87272800 | -1.29938500 | -2.35739600 |
| H | -5.96991000 | -1.89556600 | -2.16323600 |
| H | -7.48278100 | -1.81384200 | -3.11289800 |
| C | -7.95463300 | 0.77118500  | -2.79859100 |
| H | -7.93828000 | 1.86310300  | -2.68339100 |
| H | -8.41948600 | 0.55213500  | -3.77055200 |

TS7-8'

|    |             |             |             |
|----|-------------|-------------|-------------|
| S  | -3.76705500 | -2.93397900 | 0.58753000  |
| O  | -2.74559000 | -1.72567900 | 0.30803500  |
| O  | -3.50921300 | -3.64522400 | 1.90435800  |
| C  | -3.24263100 | -4.21677500 | -0.72327400 |
| O  | -5.19300300 | -2.52731900 | 0.20622700  |
| Ni | -3.82703800 | -0.14182500 | 0.23281200  |
| F  | -4.08781400 | -5.22307600 | -0.66317900 |
| F  | -2.02496400 | -4.62939300 | -0.45028200 |
| F  | -3.28595900 | -3.67325100 | -1.92615200 |
| C  | -3.80299200 | -0.88377900 | 3.26772500  |
| C  | -5.13908500 | 0.95717600  | 2.46847300  |
| C  | -5.88091500 | 0.95942200  | 3.64203000  |
| C  | -5.59128100 | 0.01164700  | 4.62340100  |
| C  | -4.56947400 | -0.91455800 | 4.42867700  |
| H  | -2.94881800 | -1.54738300 | 3.14669400  |
| H  | -6.68687000 | 1.68046800  | 3.77171900  |
| H  | -6.17195200 | -0.00426300 | 5.54398800  |
| H  | -4.35340600 | -1.65657200 | 5.19665700  |
| C  | -5.52154400 | 1.81333000  | 1.32801100  |
| O  | -5.89429000 | 2.95317000  | 1.32514700  |
| N  | -5.42787800 | 0.99000700  | 0.12344200  |
| H  | -6.03151100 | 0.16656300  | 0.26219500  |
| C  | -5.59062000 | 1.51149400  | -1.20991200 |
| C  | -4.79749100 | 0.83283000  | -2.15261000 |
| C  | -6.42844200 | 2.52305800  | -1.59978400 |
| C  | -4.88573500 | 1.14801300  | -3.52375000 |
| C  | -6.50433400 | 2.85706100  | -2.97131000 |
| H  | -7.01339200 | 3.06572200  | -0.86348900 |
| C  | -3.09669100 | -0.70446100 | -2.51122200 |
| C  | -4.01831800 | 0.45891400  | -4.39706300 |
| C  | -5.76939400 | 2.18053600  | -3.91287100 |
| H  | -7.16107900 | 3.66868500  | -3.27599300 |
| C  | -3.12808600 | -0.45754200 | -3.89503300 |
| H  | -2.40173200 | -1.40573200 | -2.05610200 |
| H  | -4.04642900 | 0.68546700  | -5.46207300 |
| H  | -5.83161300 | 2.45073000  | -4.96581900 |
| H  | -2.42221600 | -0.97141800 | -4.54225800 |
| N  | -3.91475600 | -0.09369800 | -1.67634800 |
| C  | -4.07454900 | 0.05168100  | 2.26240300  |
| S  | -1.91838500 | 2.44768300  | -1.30897400 |
| O  | -2.78266200 | 2.33868900  | -0.03701900 |
| O  | -0.86717600 | 1.30877600  | -1.45304100 |
| C  | -0.84251300 | 3.99775400  | -1.02872400 |

|    |             |             |             |
|----|-------------|-------------|-------------|
| O  | -2.66556800 | 2.76565800  | -2.60127100 |
| H  | -2.97302700 | 0.42620200  | 1.85243500  |
| F  | -0.04744400 | 3.82165600  | 0.00825200  |
| F  | -1.63101500 | 5.03470000  | -0.81866800 |
| F  | -0.11277100 | 4.20478700  | -2.11236100 |
| C  | -2.09134400 | 2.43963700  | 3.45189900  |
| H  | -2.64323400 | 1.73343200  | 4.08605300  |
| H  | -2.82217800 | 2.98438600  | 2.83789300  |
| H  | -1.55560600 | 3.16211400  | 4.07381300  |
| C  | -1.13392400 | 1.72367200  | 2.53192400  |
| O  | -0.01260200 | 2.21442000  | 2.30943200  |
| O  | -1.51994000 | 0.63485900  | 1.97559900  |
| Ag | 0.45756100  | 0.70497800  | 0.44347700  |
| C  | 3.59304700  | 0.98208800  | -0.57551200 |
| C  | 3.60783600  | -0.32156000 | -1.06149900 |
| C  | 3.03250000  | -0.62649500 | -2.32996800 |
| C  | 2.32750100  | 0.39235000  | -3.03423600 |
| C  | 2.24083700  | 1.68320000  | -2.46797800 |
| C  | 2.88018700  | 1.98000000  | -1.28966200 |
| H  | 3.63289800  | -2.71239500 | -2.37189000 |
| C  | 3.11291100  | -1.92001800 | -2.90931400 |
| C  | 1.71513000  | 0.08251900  | -4.27444500 |
| H  | 1.65389500  | 2.44182400  | -2.98462900 |
| H  | 2.81505300  | 2.99006500  | -0.88338100 |
| C  | 1.82406800  | -1.17274200 | -4.81489700 |
| C  | 2.53535600  | -2.18121800 | -4.12588100 |
| H  | 1.16450600  | 0.87109800  | -4.78871900 |
| H  | 1.36347900  | -1.39788100 | -5.77588600 |
| H  | 2.61035200  | -3.17863800 | -4.55564000 |
| C  | 8.16793600  | -2.66578400 | -0.30721900 |
| C  | 7.31977400  | -3.19323700 | 0.63250200  |
| C  | 5.95714400  | -2.80642800 | 0.67735400  |
| C  | 5.47669500  | -1.84660800 | -0.25979300 |
| C  | 7.68802800  | -1.72897500 | -1.24919600 |
| H  | 5.43496600  | -4.07769100 | 2.34554300  |
| H  | 9.21299800  | -2.96940100 | -0.33166300 |
| H  | 7.67686500  | -3.92262800 | 1.35858800  |
| C  | 5.06054300  | -3.34850100 | 1.62622600  |
| C  | 4.11746100  | -1.42391700 | -0.19353800 |
| H  | 8.36764500  | -1.30990700 | -1.98978800 |
| C  | 3.25311800  | -2.01259200 | 0.72379000  |
| C  | 3.74131400  | -2.97685800 | 1.63850900  |
| H  | 3.05950800  | -3.40936400 | 2.36979900  |
| P  | 4.43133100  | 1.31273000  | 1.06882300  |

|   |             |             |             |
|---|-------------|-------------|-------------|
| P | 1.45595300  | -1.55721500 | 0.68043100  |
| C | 6.37661500  | -1.33020700 | -1.22618300 |
| H | 6.01092300  | -0.60167000 | -1.94863300 |
| C | 0.82222700  | -2.75463900 | -0.57188200 |
| C | 0.06384900  | -2.25825300 | -1.63396100 |
| C | 1.19172400  | -4.10336700 | -0.55866600 |
| C | -0.30386000 | -3.10183200 | -2.67870600 |
| H | -0.20520100 | -1.19709200 | -1.65763000 |
| C | 0.80918800  | -4.94462400 | -1.59610100 |
| H | 1.79689400  | -4.49269000 | 0.26111800  |
| C | 0.06424800  | -4.44228500 | -2.66068000 |
| H | -0.86399000 | -2.70418500 | -3.52487300 |
| H | 1.09983500  | -5.99387100 | -1.57913300 |
| H | -0.22190600 | -5.09758300 | -3.48239100 |
| C | 0.79154600  | -2.09772700 | 2.30642600  |
| C | 1.30192400  | -1.47104500 | 3.45161100  |
| C | -0.32709000 | -2.92032600 | 2.41516200  |
| C | 0.71626800  | -1.69433500 | 4.68965300  |
| H | 2.15472700  | -0.79287000 | 3.36755100  |
| C | -0.91764300 | -3.13707200 | 3.65852100  |
| H | -0.76862500 | -3.37552300 | 1.52909400  |
| C | -0.39682600 | -2.52828800 | 4.79465600  |
| H | 1.12124600  | -1.20629900 | 5.57483600  |
| H | -1.80193000 | -3.77058300 | 3.71444600  |
| H | -0.86099000 | -2.69518800 | 5.76620300  |
| C | 6.20097400  | 1.40896900  | 0.50881200  |
| C | 7.17131300  | 0.88604400  | 1.36572000  |
| C | 6.60340500  | 1.95725300  | -0.71453900 |
| C | 8.51832700  | 0.91279600  | 1.01448600  |
| H | 6.86118700  | 0.43853200  | 2.31104000  |
| C | 7.94878800  | 1.98888600  | -1.06609100 |
| H | 5.85236300  | 2.35383600  | -1.39989000 |
| C | 8.90723900  | 1.46528300  | -0.20100100 |
| H | 9.26340300  | 0.49419100  | 1.68972000  |
| H | 8.25130100  | 2.42057300  | -2.01962600 |
| H | 9.96061500  | 1.48653800  | -0.47880200 |
| C | 3.99777000  | 3.09335800  | 1.33070200  |
| C | 2.76482200  | 3.30830700  | 1.95215200  |
| C | 4.76994500  | 4.19444200  | 0.95176600  |
| C | 2.28602200  | 4.59787200  | 2.15342100  |
| H | 2.15346600  | 2.46422000  | 2.27525200  |
| C | 4.30070000  | 5.48638900  | 1.17650300  |
| H | 5.74169600  | 4.04841100  | 0.48162600  |
| C | 3.05629200  | 5.69057800  | 1.76684700  |

|   |            |            |            |
|---|------------|------------|------------|
| H | 1.30415500 | 4.72463200 | 2.60869900 |
| H | 4.91072400 | 6.33997900 | 0.88228600 |
| H | 2.69023700 | 6.70344000 | 1.92815900 |

**TS8-28**

|    |             |             |             |
|----|-------------|-------------|-------------|
| S  | -3.37440700 | 3.10270300  | -1.51011300 |
| O  | -3.54684900 | 1.67595000  | -0.86354300 |
| O  | -2.43086500 | 3.08164000  | -2.70914900 |
| C  | -2.37016700 | 3.96878700  | -0.12846500 |
| O  | -4.65990700 | 3.90860500  | -1.60431500 |
| Ni | -4.84602900 | -0.22765900 | 0.03086600  |
| F  | -1.83596400 | 5.08680500  | -0.57439500 |
| F  | -1.41668700 | 3.13203800  | 0.25686300  |
| F  | -3.16345900 | 4.22720800  | 0.89653000  |
| C  | -5.69222000 | -0.30974000 | -2.76574400 |
| C  | -5.85376600 | -2.33657100 | -1.45218300 |
| C  | -5.97566000 | -3.09403600 | -2.61454400 |
| C  | -5.91439700 | -2.46969600 | -3.85256200 |
| C  | -5.75644300 | -1.08588400 | -3.92190600 |
| H  | -5.59310600 | 0.76146100  | -2.85311000 |
| H  | -6.09299000 | -4.17367100 | -2.53190800 |
| H  | -5.98046800 | -3.05777100 | -4.77053000 |
| H  | -5.68202600 | -0.59766200 | -4.89480800 |
| C  | -5.85257000 | -2.95381700 | -0.09491600 |
| O  | -6.72495600 | -3.66541400 | 0.35937500  |
| N  | -4.76644900 | -2.46155200 | 0.62399400  |
| H  | -3.86609100 | -2.37884800 | 0.11070100  |
| C  | -4.61110400 | -2.43109900 | 2.02424100  |
| C  | -3.93212000 | -1.27909800 | 2.51237100  |
| C  | -4.96833000 | -3.43495800 | 2.88854300  |
| C  | -3.44863700 | -1.26934400 | 3.84548100  |
| C  | -4.59457100 | -3.35849100 | 4.24765500  |
| H  | -5.50723500 | -4.30256600 | 2.50478800  |
| C  | -2.94662200 | 0.78340300  | 2.06867200  |
| C  | -2.60930700 | -0.20469200 | 4.21737900  |
| C  | -3.81479000 | -2.33137200 | 4.70882800  |
| H  | -4.88213000 | -4.16573500 | 4.91981000  |
| C  | -2.31895000 | 0.79796900  | 3.32606500  |
| H  | -2.82612600 | 1.59985400  | 1.36159300  |
| H  | -2.17506500 | -0.19954300 | 5.22458000  |
| H  | -3.45355800 | -2.31330800 | 5.73582000  |
| H  | -1.63386700 | 1.60224300  | 3.57912000  |
| N  | -3.73086400 | -0.20161900 | 1.67076400  |
| C  | -5.72663000 | -0.92736300 | -1.50665400 |



|    |             |             |             |
|----|-------------|-------------|-------------|
| S  | -1.21993200 | -2.61434700 | 0.72938900  |
| O  | -2.16949300 | -2.15007900 | -0.40944500 |
| O  | -0.24091700 | -1.51953500 | 1.23099100  |
| C  | -0.08174800 | -3.86507000 | -0.13560100 |
| O  | -1.87868200 | -3.42382300 | 1.83957000  |
| H  | -2.01223900 | 0.94892200  | -1.02892500 |
| F  | 0.68575600  | -3.21827000 | -1.00113800 |
| F  | -0.81001400 | -4.76041800 | -0.76447500 |
| F  | 0.67961100  | -4.45837400 | 0.76553200  |
| C  | -2.13046700 | -0.28643000 | -3.08605000 |
| H  | -2.41301900 | 0.72923400  | -3.41227800 |
| H  | -2.98792800 | -0.70695100 | -2.54011500 |
| H  | -1.89725200 | -0.91844400 | -3.95382200 |
| C  | -0.96110900 | -0.21046500 | -2.15958200 |
| O  | 0.09378900  | -0.81216000 | -2.32616200 |
| O  | -1.09036500 | 0.58538300  | -1.10950100 |
| Ag | 1.25558900  | -0.41066700 | -0.18896000 |
| C  | 4.27207200  | -1.11090400 | 0.40601300  |
| C  | 4.33189300  | -0.00669600 | 1.24960400  |
| C  | 3.65868000  | -0.00193300 | 2.50353000  |
| C  | 2.82528400  | -1.10146700 | 2.83838500  |
| C  | 2.73851500  | -2.19998500 | 1.95077800  |
| C  | 3.45521400  | -2.21396800 | 0.77859500  |
| H  | 4.37784300  | 1.93706900  | 3.15183100  |
| C  | 3.73653500  | 1.09109900  | 3.40051200  |
| C  | 2.06023700  | -1.05952500 | 4.02742100  |
| H  | 2.07503400  | -3.02542700 | 2.20511600  |
| H  | 3.36323800  | -3.06394400 | 0.09810000  |
| C  | 2.14652200  | 0.02064000  | 4.87546500  |
| C  | 3.00787700  | 1.09982800  | 4.56203500  |
| H  | 1.39182700  | -1.88864700 | 4.24855900  |
| H  | 1.56607500  | 0.04732200  | 5.79495200  |
| H  | 3.07832200  | 1.94209800  | 5.24062800  |
| C  | 9.13857300  | 1.87440500  | 1.24430700  |
| C  | 8.39697200  | 2.76355800  | 0.51371300  |
| C  | 7.00089500  | 2.58912800  | 0.35347500  |
| C  | 6.37304600  | 1.45881000  | 0.96578300  |
| C  | 8.51321800  | 0.77248400  | 1.86846000  |
| H  | 6.69040500  | 4.35259300  | -0.85935300 |
| H  | 10.21111700 | 2.01877900  | 1.35211500  |
| H  | 8.86766500  | 3.62184300  | 0.03288700  |
| C  | 6.21054900  | 3.48746400  | -0.40145900 |
| C  | 4.97889700  | 1.23992500  | 0.75226600  |
| H  | 9.10792900  | 0.06768000  | 2.44537800  |

|   |             |             |             |
|---|-------------|-------------|-------------|
| C | 4.23054100  | 2.14461100  | 0.01220900  |
| C | 4.86448800  | 3.28124800  | -0.55352800 |
| H | 4.27676000  | 3.97392200  | -1.15320800 |
| P | 5.14043600  | -0.99050400 | -1.24201300 |
| P | 2.42637100  | 1.82149800  | -0.28520800 |
| C | 7.16154900  | 0.56757000  | 1.73662700  |
| H | 6.68817700  | -0.28494400 | 2.20976200  |
| C | 1.59067500  | 3.05992900  | 0.79649500  |
| C | 0.97381200  | 2.60359800  | 1.96521500  |
| C | 1.58003100  | 4.43064400  | 0.50964800  |
| C | 0.37761900  | 3.50908000  | 2.84275000  |
| H | 0.95119000  | 1.53449000  | 2.19719500  |
| C | 0.96448100  | 5.32897800  | 1.36876000  |
| H | 2.02877300  | 4.79670200  | -0.41450600 |
| C | 0.36878600  | 4.86786500  | 2.54227100  |
| H | -0.08165800 | 3.15230800  | 3.76080500  |
| H | 0.94484400  | 6.38801900  | 1.12958500  |
| H | -0.10967000 | 5.57262400  | 3.21798400  |
| C | 2.13055200  | 2.39646100  | -2.00340800 |
| C | 3.08352800  | 2.14896500  | -3.00986000 |
| C | 0.85383500  | 2.85504400  | -2.35701800 |
| C | 2.76925300  | 2.40196800  | -4.34599900 |
| H | 4.07453200  | 1.76636300  | -2.75023300 |
| C | 0.53775100  | 3.08456400  | -3.69002300 |
| H | 0.07896900  | 2.99292100  | -1.59339300 |
| C | 1.49867900  | 2.87136900  | -4.68334000 |
| H | 3.51616300  | 2.22519900  | -5.11795600 |
| H | -0.46531100 | 3.43293400  | -3.93792500 |
| H | 1.26156900  | 3.05841500  | -5.73383700 |
| C | 6.81319100  | -1.62898000 | -0.75970200 |
| C | 7.92498100  | -0.96577200 | -1.29180500 |
| C | 7.01803200  | -2.65894200 | 0.16338700  |
| C | 9.21385600  | -1.34263700 | -0.93165400 |
| H | 7.77113700  | -0.13251200 | -1.97937700 |
| C | 8.30485400  | -3.03321200 | 0.52312100  |
| H | 6.16188000  | -3.16706400 | 0.60669100  |
| C | 9.40557200  | -2.38362800 | -0.02123700 |
| H | 10.07030600 | -0.81420100 | -1.34229500 |
| H | 8.45428000  | -3.84479600 | 1.24135000  |
| H | 10.41506900 | -2.67488400 | 0.27091300  |
| C | 4.35674100  | -2.38850900 | -2.16502300 |
| C | 3.12789700  | -2.08668200 | -2.77685400 |
| C | 4.88522900  | -3.67339500 | -2.30189700 |
| C | 2.44388100  | -3.06185000 | -3.48828500 |

|   |             |             |             |
|---|-------------|-------------|-------------|
| H | 2.71156200  | -1.08013800 | -2.70708800 |
| C | 4.20476200  | -4.63872500 | -3.02895300 |
| H | 5.84665100  | -3.91546900 | -1.84789200 |
| C | 2.97645800  | -4.34143100 | -3.61806600 |
| H | 1.47664200  | -2.81201600 | -3.92396200 |
| H | 4.62550400  | -5.64114800 | -3.13218300 |
| H | 2.44029400  | -5.10184000 | -4.17704900 |
| C | -7.02074200 | -0.11881500 | -0.05923000 |
| C | -6.34737100 | 0.61985300  | 0.96588400  |
| C | -6.68753000 | 2.06892000  | 0.72868600  |
| C | -7.82766500 | 0.90473800  | -0.83409600 |
| H | -5.98794900 | 2.80815400  | 1.14221000  |
| H | -7.45923600 | -1.09821100 | 0.15291100  |
| H | -6.27030800 | 0.22568600  | 1.98123700  |
| H | -8.19652900 | 0.57681300  | -1.80447300 |
| C | -8.92864100 | 1.34209300  | 0.17163600  |
| H | -9.46225600 | 0.48449200  | 0.60852200  |
| H | -9.67274900 | 1.95014300  | -0.35737900 |
| C | -6.90719100 | 2.12098100  | -0.78161300 |
| H | -5.97582200 | 2.02018300  | -1.34613500 |
| H | -7.39652200 | 3.04845700  | -1.10962600 |
| C | -8.15790600 | 2.17779400  | 1.22440900  |
| H | -8.28388200 | 1.79871400  | 2.24873200  |
| H | -8.47753300 | 3.22655100  | 1.22361700  |

**TS11-29**

|    |             |             |             |
|----|-------------|-------------|-------------|
| S  | -4.16229100 | 1.30394700  | 1.04490500  |
| O  | -4.11011300 | 2.14967900  | 2.30551100  |
| O  | -4.22600200 | 2.04707700  | -0.31268900 |
| C  | -5.80384700 | 0.34024900  | 1.10517800  |
| O  | -3.10693500 | 0.13280400  | 1.02008600  |
| Ni | -1.40531500 | 0.44914200  | 0.08170100  |
| F  | -5.91936800 | -0.38363200 | 0.01138500  |
| F  | -6.78703100 | 1.20800900  | 1.18249400  |
| F  | -5.78869200 | -0.43572800 | 2.16631500  |
| C  | -2.75325200 | -2.80527600 | -0.76488700 |
| C  | -1.35306900 | -0.96355000 | -1.45024100 |
| C  | -2.45272300 | -0.36065800 | -2.10034400 |
| C  | -3.69899800 | -0.97839400 | -2.05942800 |
| C  | -3.83486300 | -2.19913500 | -1.41053700 |
| H  | -2.89945000 | -3.74782200 | -0.23973800 |
| H  | -2.32319100 | 0.57605600  | -2.64484000 |
| H  | -4.55945200 | -0.49678400 | -2.51846900 |
| H  | -4.80915200 | -2.68550500 | -1.38300400 |

|   |             |             |             |
|---|-------------|-------------|-------------|
| C | 0.05239000  | -0.42898200 | -1.60208900 |
| O | 0.92541800  | -0.87838200 | -2.31952500 |
| N | 0.01467300  | 1.02907200  | -1.24669800 |
| H | -0.12553700 | 1.59250700  | -2.09721900 |
| C | 1.07834300  | 1.57212800  | -0.45378900 |
| C | 0.74841200  | 1.88340300  | 0.88212700  |
| C | 2.32907700  | 1.85910000  | -0.93803800 |
| C | 1.68250400  | 2.54062500  | 1.71221100  |
| C | 3.27656200  | 2.49424800  | -0.10470600 |
| H | 2.57312500  | 1.60493000  | -1.96772600 |
| C | -0.86838300 | 1.86947000  | 2.56398500  |
| C | 1.26200700  | 2.87762200  | 3.01892100  |
| C | 2.96032900  | 2.84123200  | 1.18499500  |
| H | 4.26054200  | 2.72822500  | -0.50478300 |
| C | -0.00286700 | 2.55107600  | 3.43915200  |
| H | -1.88090200 | 1.59719700  | 2.86075200  |
| H | 1.94932000  | 3.41179000  | 3.67376300  |
| H | 3.67722800  | 3.36429000  | 1.81572600  |
| H | -0.35904100 | 2.81653500  | 4.43022300  |
| N | -0.50140200 | 1.54613700  | 1.33633300  |
| C | -1.50893900 | -2.19760400 | -0.76696900 |
| C | -0.28343700 | -2.66782700 | -0.02532800 |
| C | 0.50928800  | -1.40775700 | 0.36294200  |
| C | 0.49158600  | -1.42027100 | 1.88994000  |
| C | -0.58006000 | -3.31579500 | 1.34123900  |
| H | 0.69977100  | -0.45961200 | 2.37731100  |
| H | 0.28571300  | -3.35441700 | -0.67319400 |
| H | 1.52653300  | -1.33680600 | -0.03850200 |
| H | -1.36929400 | -4.07844100 | 1.31814300  |
| C | 0.75260300  | -3.82822500 | 1.90695100  |
| H | 1.31113500  | -4.42127100 | 1.16990500  |
| H | 0.57712200  | -4.47405900 | 2.77757700  |
| C | -0.84066700 | -2.09319900 | 2.23147400  |
| H | -1.72735800 | -1.50908800 | 1.95031900  |
| H | -0.91993200 | -2.36127900 | 3.29481900  |
| C | 1.48608700  | -2.52563000 | 2.31353300  |
| H | 2.46327700  | -2.41159800 | 1.82656400  |
| H | 1.65542700  | -2.48639600 | 3.40015900  |
| S | -0.19207200 | 5.25867900  | 0.16210200  |
| O | 0.03326300  | 4.39775800  | -1.12917000 |
| O | -1.37514300 | 4.65367600  | 0.95874500  |
| C | -0.93255000 | 6.85294300  | -0.56646200 |
| O | 1.05194900  | 5.66273200  | 0.92729200  |
| H | -0.49172500 | 4.71869300  | -2.68103300 |

|    |             |            |             |
|----|-------------|------------|-------------|
| F  | -2.03618100 | 6.52428300 | -1.22094600 |
| F  | -0.06485100 | 7.38555500 | -1.40335200 |
| F  | -1.21429100 | 7.69404400 | 0.40143500  |
| C  | -2.05132700 | 3.70433400 | -5.31261100 |
| H  | -2.54311000 | 2.75635200 | -5.53935000 |
| H  | -1.23218700 | 3.88822800 | -6.01624400 |
| H  | -2.76575500 | 4.52795000 | -5.43014300 |
| C  | -1.53173600 | 3.69956000 | -3.91056600 |
| O  | -0.84259300 | 4.77783300 | -3.61748700 |
| O  | -1.73829800 | 2.78026500 | -3.12018500 |
| Ag | -2.17256500 | 3.09126700 | -0.68864300 |

**P**

|   |             |             |             |
|---|-------------|-------------|-------------|
| C | -3.58666300 | -0.13742100 | 0.31616000  |
| C | -1.38229800 | 0.65316100  | -0.13692400 |
| C | -0.93594100 | -0.64418200 | -0.38502000 |
| C | -1.82509900 | -1.70911500 | -0.27655000 |
| C | -3.14677600 | -1.44389700 | 0.07103800  |
| H | -4.62644800 | 0.03731300  | 0.58715400  |
| H | -1.49622300 | -2.73183200 | -0.46404800 |
| H | -3.85438800 | -2.26788500 | 0.15438400  |
| C | -2.70125900 | 0.92626200  | 0.21613000  |
| H | -3.00625000 | 1.95473100  | 0.40542300  |
| C | 0.52891700  | -0.67727200 | -0.73078500 |
| C | 0.97109400  | 0.81180500  | -0.68262300 |
| C | 2.06251800  | 0.82783900  | 0.40225000  |
| C | 1.42679200  | -1.33287800 | 0.34010000  |
| H | 2.24629900  | 1.83297300  | 0.79942100  |
| H | 0.68908200  | -1.14987400 | -1.71184600 |
| H | 1.34999800  | 1.20331600  | -1.63709400 |
| H | 1.05042200  | -2.30218600 | 0.69226200  |
| C | 2.85846000  | -1.37107800 | -0.21455200 |
| H | 2.89625800  | -1.79392400 | -1.22785800 |
| H | 3.50133300  | -1.99527000 | 0.42026300  |
| C | 1.53985500  | -0.22250400 | 1.39082300  |
| H | 0.58416300  | 0.04305400  | 1.86209000  |
| H | 2.26474200  | -0.45941200 | 2.18172700  |
| C | 3.29816800  | 0.11737800  | -0.16547900 |
| H | 3.58513900  | 0.51114600  | -1.14966800 |
| H | 4.16011000  | 0.25256500  | 0.50169400  |
| C | -0.26516400 | 1.60713500  | -0.27667300 |
| O | -0.29998300 | 2.80423700  | -0.07766000 |

**M**

|   |             |             |             |
|---|-------------|-------------|-------------|
| C | -1.26849900 | -0.49835200 | -0.93778400 |
| C | -0.22143100 | 0.33356600  | -1.33773400 |
| C | 0.60532400  | -0.02400500 | -2.44656400 |
| C | 0.38609700  | -1.26652000 | -3.10748300 |
| C | -0.69489100 | -2.07586300 | -2.69672300 |
| C | -1.50466200 | -1.69811700 | -1.65866000 |
| H | 1.85115100  | 1.75365400  | -2.40415100 |
| C | 1.67266000  | 0.79774000  | -2.89478800 |
| C | 1.25475800  | -1.66174900 | -4.15217900 |
| H | -0.86407200 | -3.02390700 | -3.20824700 |
| H | -2.32166000 | -2.35031800 | -1.35474800 |
| C | 2.28730300  | -0.85253800 | -4.55183800 |
| C | 2.48947000  | 0.39410700  | -3.92041000 |
| H | 1.08390000  | -2.62703800 | -4.62861300 |
| H | 2.95071800  | -1.16666600 | -5.35598800 |
| H | 3.30968000  | 1.03543000  | -4.23997000 |
| C | -1.38868900 | 5.28501300  | -2.18053800 |
| C | -0.72834300 | 5.26646300  | -0.97838000 |
| C | -0.23287400 | 4.05375200  | -0.44246100 |
| C | -0.44929900 | 2.83598000  | -1.14935800 |
| C | -1.59125300 | 4.08352300  | -2.89188400 |
| H | 0.64914400  | 4.95754800  | 1.31252800  |
| H | -1.75260500 | 6.22547900  | -2.59112400 |
| H | -0.55914700 | 6.18804300  | -0.42069000 |
| C | 0.49901500  | 4.02539600  | 0.76692400  |
| C | 0.06403100  | 1.61086600  | -0.61905200 |
| H | -2.10961100 | 4.10418100  | -3.84919100 |
| C | 0.85103500  | 1.63988500  | 0.52574700  |
| C | 1.04404900  | 2.85677500  | 1.22828200  |
| H | 1.63551200  | 2.85955700  | 2.14340200  |
| P | -2.09873300 | -0.23148200 | 0.72436600  |
| P | 1.75831100  | 0.10923600  | 1.04640800  |
| C | -1.14478700 | 2.88933100  | -2.38412700 |
| H | -1.31029700 | 1.96454200  | -2.93475700 |
| C | 3.26728400  | 0.15018000  | -0.00410300 |
| C | 3.62534700  | -1.01565000 | -0.68678700 |
| C | 4.01764800  | 1.31822300  | -0.18553100 |
| C | 4.73489400  | -1.01532600 | -1.52790600 |
| H | 3.02029800  | -1.92119200 | -0.59019300 |
| C | 5.12629500  | 1.31165400  | -1.02255600 |
| H | 3.72455500  | 2.23905000  | 0.32170200  |
| C | 5.48642600  | 0.14273300  | -1.69157100 |
| H | 4.99953100  | -1.92398000 | -2.06541900 |
| H | 5.70877300  | 2.22159900  | -1.15855200 |

|    |             |             |             |
|----|-------------|-------------|-------------|
| H  | 6.35290200  | 0.14087700  | -2.35139500 |
| C  | 2.29124800  | 0.49802700  | 2.76371400  |
| C  | 1.29025400  | 0.49932700  | 3.74366100  |
| C  | 3.61369400  | 0.74471100  | 3.13199200  |
| C  | 1.60898300  | 0.76315000  | 5.06904400  |
| H  | 0.25590500  | 0.28975900  | 3.45969500  |
| C  | 3.93032300  | 0.99700100  | 4.46508100  |
| H  | 4.40143400  | 0.73280400  | 2.37939100  |
| C  | 2.93149600  | 1.01131600  | 5.43173100  |
| H  | 0.82467900  | 0.76500300  | 5.82403000  |
| H  | 4.96560500  | 1.18296100  | 4.74631900  |
| H  | 3.18277000  | 1.20910400  | 6.47241900  |
| C  | -2.89951100 | 1.42632700  | 0.54797200  |
| C  | -2.76862300 | 2.31703300  | 1.61599100  |
| C  | -3.61421900 | 1.82788700  | -0.58542300 |
| C  | -3.34336400 | 3.58336000  | 1.55910400  |
| H  | -2.19829200 | 2.01507700  | 2.49587200  |
| C  | -4.19123800 | 3.09081700  | -0.64317600 |
| H  | -3.70764200 | 1.14375800  | -1.43099000 |
| C  | -4.05637000 | 3.96983300  | 0.42926300  |
| H  | -3.22945500 | 4.27016400  | 2.39656000  |
| H  | -4.73668700 | 3.39752800  | -1.53483900 |
| H  | -4.50260700 | 4.96195700  | 0.37822000  |
| C  | -3.54727600 | -1.39441000 | 0.68577100  |
| C  | -3.28458600 | -2.75402300 | 0.91365500  |
| C  | -4.87589300 | -0.97883800 | 0.55802200  |
| C  | -4.32717900 | -3.67310300 | 0.96458600  |
| H  | -2.25956200 | -3.11552600 | 1.03306000  |
| C  | -5.91655500 | -1.90058100 | 0.63001100  |
| H  | -5.10906700 | 0.07437800  | 0.41103100  |
| C  | -5.64596500 | -3.25031700 | 0.82547500  |
| H  | -4.10028900 | -4.72585500 | 1.12745100  |
| H  | -6.94561300 | -1.55732300 | 0.53074000  |
| H  | -6.46152100 | -3.97026700 | 0.87806900  |
| C  | 0.24583000  | -4.47632000 | -0.26002400 |
| O  | -0.32082800 | -4.01986500 | 0.79446100  |
| O  | 1.18401600  | -3.91058300 | -0.85135000 |
| Ag | 0.66370100  | -2.05071300 | 0.85765900  |
| C  | -0.33459200 | -5.76367200 | -0.80237600 |
| H  | -1.36874000 | -5.57625700 | -1.12397400 |
| H  | 0.24752400  | -6.13715200 | -1.64971400 |
| H  | -0.38050100 | -6.52370900 | -0.01408100 |

N

|    |             |             |             |
|----|-------------|-------------|-------------|
| S  | -2.22216600 | -1.43724700 | -0.74402700 |
| O  | -1.61387600 | -0.04800100 | -1.17558000 |
| O  | -3.21487000 | -2.15473800 | -1.61366600 |
| C  | -3.03945100 | -1.12705200 | 0.96708300  |
| O  | -0.85507800 | -2.18258400 | -0.36555900 |
| S  | 0.77203900  | 1.97997700  | 0.41176900  |
| O  | -0.04332300 | 1.22020300  | 1.45593000  |
| O  | 2.07730200  | 2.65442900  | 0.77647800  |
| C  | -0.37285800 | 3.34132000  | -0.28127900 |
| O  | 0.93124600  | 1.04412700  | -0.89858900 |
| Ni | 0.19481400  | -0.60807500 | -0.58260300 |
| F  | 0.24650100  | 3.94134500  | -1.27176600 |
| F  | -0.61884600 | 4.19131600  | 0.69244200  |
| F  | -1.48428000 | 2.78162900  | -0.69500100 |
| F  | -2.11557100 | -0.69337500 | 1.78231400  |
| F  | -3.98674200 | -0.23888300 | 0.79908600  |
| F  | -3.53141900 | -2.27263000 | 1.37520700  |
| C  | 1.72754500  | -1.33010300 | 0.67125500  |
| C  | 1.88693900  | -2.03157800 | -0.50976400 |
| C  | 3.27953900  | -1.76471900 | -0.99989700 |
| C  | 3.03110900  | -0.61422200 | 0.92190100  |
| H  | 3.48016500  | -1.98933000 | -2.05067100 |
| H  | 1.00777100  | -1.56675700 | 1.45784300  |
| H  | 1.27855200  | -2.87515200 | -0.83207600 |
| H  | 2.99985900  | 0.22849300  | 1.61761500  |
| C  | 3.97316800  | -1.78610600 | 1.33631200  |
| H  | 3.56054500  | -2.38851900 | 2.15490600  |
| H  | 4.92969400  | -1.37516700 | 1.68170700  |
| C  | 3.54967800  | -0.34512100 | -0.49609200 |
| H  | 2.99572600  | 0.43138400  | -1.02711300 |
| H  | 4.62021900  | -0.10378800 | -0.50079100 |
| C  | 4.13822300  | -2.58410800 | 0.01964400  |
| H  | 3.81282600  | -3.62861700 | 0.10270500  |
| H  | 5.18054300  | -2.59210100 | -0.32272400 |
| Q  |             |             |             |
| C  | 1.55197500  | -0.68909300 | -0.81031200 |
| C  | 1.55237600  | 0.68564500  | -0.81508400 |
| C  | 2.31768800  | 1.12797700  | 0.41157300  |
| C  | 2.31728200  | -1.12366300 | 0.41907900  |
| H  | 2.15082400  | 2.15742000  | 0.74034300  |
| H  | 1.37743700  | -1.32739600 | -1.67600300 |
| H  | 1.37790300  | 1.31845400  | -1.68478900 |
| H  | 2.14996500  | -2.15083000 | 0.75466900  |
| C  | 3.79796700  | -0.77367700 | 0.08955500  |



|    |             |             |             |
|----|-------------|-------------|-------------|
| H  | 4.12307800  | -1.20704800 | -0.86407800 |
| H  | 4.45679000  | -1.17162000 | 0.87180500  |
| C  | 1.98950100  | 0.00547900  | 1.40357800  |
| H  | 0.94396100  | 0.00684000  | 1.74514100  |
| H  | 2.65042500  | 0.00828400  | 2.28070700  |
| C  | 3.79827100  | 0.77519700  | 0.08439800  |
| H  | 4.12359000  | 1.20213200  | -0.87206500 |
| H  | 4.45721700  | 1.17808300  | 0.86401200  |
| C  | -4.63712700 | 0.00896600  | 0.55245000  |
| H  | -5.03171000 | -1.00346100 | 0.67198800  |
| H  | -5.17717100 | 0.52278600  | -0.25154100 |
| H  | -4.80722500 | 0.58548500  | 1.46907100  |
| C  | -3.16330800 | -0.00902200 | 0.23367000  |
| O  | -2.57223900 | 1.10217400  | 0.10199800  |
| O  | -2.57331400 | -1.11893800 | 0.10730600  |
| Ag | -0.61230700 | -0.00067800 | -0.32206700 |
|    |             |             |             |
| S  |             |             |             |
| S  | 1.15848800  | 2.14954100  | 0.54366300  |
| O  | 0.27930200  | 1.83589900  | 1.74820200  |
| O  | 2.64663500  | 2.38250500  | 0.67887900  |
| C  | 0.45847000  | 3.76971800  | -0.18227200 |
| O  | 0.76411300  | 1.16745800  | -0.68189400 |
| S  | 2.82161100  | -1.63876400 | 0.00062600  |
| O  | 1.81202800  | -0.73732600 | 0.88503100  |
| O  | 3.36986700  | -2.77518500 | 0.84544300  |
| C  | 4.26861900  | -0.43434500 | -0.31794900 |
| O  | 2.19112900  | -1.92517000 | -1.36283400 |
| Ni | 0.24166900  | -0.49961700 | -0.08459700 |
| F  | 5.23056600  | -1.13259800 | -0.89017000 |
| F  | 4.67120700  | 0.04209300  | 0.83279000  |
| F  | 3.85323700  | 0.51090300  | -1.11959600 |
| F  | -0.82614700 | 3.60556900  | -0.43747300 |
| F  | 0.61664400  | 4.72329200  | 0.71227300  |
| F  | 1.11022400  | 4.06642800  | -1.28402100 |
| C  | -4.54685700 | 2.74082600  | 0.67870600  |
| C  | -2.80889000 | 1.30331600  | -0.18134000 |
| C  | -2.57963000 | 0.80687200  | 1.10516200  |
| C  | -3.33266900 | 1.27856800  | 2.17137100  |
| C  | -4.31965000 | 2.23598500  | 1.95807400  |
| H  | -5.31109100 | 3.49828600  | 0.51700800  |
| H  | -1.77756300 | 0.09517300  | 1.29342900  |
| H  | -3.13380100 | 0.90968800  | 3.17497800  |
| H  | -4.90850100 | 2.60154800  | 2.79759900  |

|          |             |             |             |
|----------|-------------|-------------|-------------|
| C        | -2.04929500 | 0.88204900  | -1.36700900 |
| O        | -2.02231900 | 1.46050400  | -2.42257800 |
| N        | -1.31045600 | -0.39720000 | -1.28079000 |
| H        | -0.81735900 | -0.45245400 | -2.18187100 |
| C        | -2.13418000 | -1.57454300 | -1.08101300 |
| C        | -1.63594800 | -2.50099800 | -0.14800900 |
| C        | -3.31211700 | -1.81738600 | -1.74092100 |
| C        | -2.33712000 | -3.69778300 | 0.11907000  |
| C        | -4.02222500 | -3.00962800 | -1.47726400 |
| H        | -3.69325200 | -1.09682700 | -2.46396900 |
| C        | 0.03434600  | -3.01026400 | 1.38116600  |
| C        | -1.77049200 | -4.57105500 | 1.07693000  |
| C        | -3.54829600 | -3.93053100 | -0.57382100 |
| H        | -4.95520000 | -3.19564400 | -2.00412000 |
| C        | -0.59760900 | -4.22893300 | 1.70088700  |
| H        | 0.96923400  | -2.70583100 | 1.84916600  |
| H        | -2.27621200 | -5.50770700 | 1.30939200  |
| H        | -4.10029500 | -4.84833700 | -0.37597300 |
| H        | -0.13746300 | -4.87974600 | 2.43867600  |
| N        | -0.47080500 | -2.17941500 | 0.48631900  |
| C        | -3.78871200 | 2.28315700  | -0.38632900 |
| H        | -3.93206600 | 2.67419700  | -1.39176600 |
| <b>T</b> |             |             |             |
| C        | -4.26825900 | 2.23588100  | -0.26985400 |
| C        | -2.15456400 | 1.41101900  | 0.55134100  |
| C        | -1.94382300 | 0.74394000  | -0.65813600 |
| C        | -2.90271800 | 0.81107500  | -1.66169600 |
| C        | -4.05763200 | 1.56503100  | -1.47372200 |
| H        | -5.17671100 | 2.81650700  | -0.11946200 |
| H        | -1.06299300 | 0.12343300  | -0.82107800 |
| H        | -2.73997900 | 0.25707500  | -2.58452100 |
| H        | -4.80478300 | 1.62323900  | -2.26397800 |
| C        | -1.23305700 | 1.27077400  | 1.70512200  |
| O        | -1.60698800 | 1.33269100  | 2.86008500  |
| N        | 0.11242200  | 0.96064800  | 1.43880700  |
| H        | 0.58918900  | 0.71436100  | 2.30481200  |
| C        | 0.94243500  | 1.55353400  | 0.46683900  |
| C        | 2.12702100  | 0.85637600  | 0.08313000  |
| C        | 0.68566800  | 2.79135900  | -0.08306200 |
| C        | 3.04627600  | 1.48317100  | -0.80277500 |
| C        | 1.57097700  | 3.37521200  | -1.00973500 |
| H        | -0.21095500 | 3.33079000  | 0.21517700  |
| C        | 3.47936000  | -1.01499900 | 0.25827400  |

|          |             |             |             |
|----------|-------------|-------------|-------------|
| C        | 4.23989300  | 0.79018600  | -1.10402700 |
| C        | 2.74192800  | 2.74916300  | -1.35171600 |
| H        | 1.32848300  | 4.35005700  | -1.42725600 |
| C        | 4.47199600  | -0.44630500 | -0.55951700 |
| H        | 3.60911700  | -2.01977600 | 0.66090700  |
| H        | 4.96391500  | 1.25350600  | -1.77408100 |
| H        | 3.44853500  | 3.20914900  | -2.04116200 |
| H        | 5.38197300  | -1.00190700 | -0.76987100 |
| N        | 2.35084000  | -0.40120000 | 0.56962800  |
| C        | -3.32828800 | 2.14518600  | 0.74683300  |
| H        | -3.48937900 | 2.62689800  | 1.70967000  |
| C        | -2.69323100 | -3.35565800 | -1.49031500 |
| H        | -2.61367200 | -3.41270000 | -2.58005800 |
| H        | -3.55719900 | -2.72582900 | -1.23848800 |
| H        | -2.87512100 | -4.34782100 | -1.06534300 |
| C        | -1.45209600 | -2.72974800 | -0.89456100 |
| O        | -1.23504800 | -2.97899000 | 0.33963100  |
| O        | -0.74004000 | -1.98371500 | -1.60012700 |
| Ag       | 0.48919300  | -1.68264200 | 0.64307300  |
| <b>W</b> |             |             |             |
| S        | 0.48993900  | 3.00786400  | 0.79060900  |
| O        | -0.31805300 | 2.31114600  | -0.39916800 |
| O        | 0.01941500  | 4.34303700  | 1.29757400  |
| C        | 2.33937800  | 3.22704500  | 0.14115100  |
| O        | 0.48837100  | 1.77178400  | 1.79928000  |
| S        | 2.43161800  | -0.66203000 | -1.28800100 |
| O        | 3.56240500  | -0.09578800 | -2.12368400 |
| C        | 3.12568000  | -2.25411200 | -0.50474900 |
| O        | 2.03606700  | 0.15405500  | -0.03035000 |
| Ni       | -0.23429700 | 0.61711400  | 0.43699200  |
| C        | -5.77279300 | 1.25988800  | -0.97976700 |
| C        | -3.45073100 | 0.60017800  | -0.89056100 |
| C        | -3.54393200 | 0.47808800  | 0.49977500  |
| C        | -4.74367900 | 0.74913900  | 1.14331000  |
| C        | -5.85947000 | 1.13274100  | 0.40457600  |
| H        | -6.64336600 | 1.56604700  | -1.55626300 |
| H        | -2.67146000 | 0.20147900  | 1.09063500  |
| H        | -4.80628100 | 0.66698800  | 2.22648200  |
| H        | -6.79999500 | 1.34104400  | 0.91177900  |
| C        | -2.20765900 | 0.36073000  | -1.65619600 |
| O        | -2.03006200 | 0.72602900  | -2.78978400 |
| N        | -1.13353500 | -0.36846100 | -0.98563900 |
| C        | -1.42859600 | -1.69879300 | -0.50366600 |

|   |             |             |             |
|---|-------------|-------------|-------------|
| C | -0.86060200 | -2.01084400 | 0.74263500  |
| C | -2.10790600 | -2.65889400 | -1.20725800 |
| C | -0.93965200 | -3.31415000 | 1.27696700  |
| C | -2.22918900 | -3.95911200 | -0.66486300 |
| H | -2.52769300 | -2.42872200 | -2.18554500 |
| C | 0.39999000  | -1.22719200 | 2.53087600  |
| C | -0.28232300 | -3.53437100 | 2.50902000  |
| C | -1.65377400 | -4.28791300 | 0.53926000  |
| H | -2.77049000 | -4.71477600 | -1.22942100 |
| C | 0.38957400  | -2.50463500 | 3.12410500  |
| H | 0.91938000  | -0.37883400 | 2.97467500  |
| H | -0.30835600 | -4.52726400 | 2.95689800  |
| H | -1.73412500 | -5.29890000 | 0.93587600  |
| H | 0.91244700  | -2.65544200 | 4.06431000  |
| N | -0.22311100 | -0.99800300 | 1.39233000  |
| C | -4.57207300 | 1.00196000  | -1.62407700 |
| H | -4.47598300 | 1.10838700  | -2.70255400 |
| F | 4.18462600  | -1.96160900 | 0.22580900  |
| F | 3.45285500  | -3.11324300 | -1.44894100 |
| F | 2.19510900  | -2.79814700 | 0.27770400  |
| F | 2.40160600  | 2.76902500  | -1.07067600 |
| F | 2.56557100  | 4.51844100  | 0.17305700  |
| F | 3.12326400  | 2.59513900  | 0.96549500  |
| O | 1.19347300  | -1.19895000 | -2.04742200 |
| H | -0.31582800 | -0.46277100 | -1.64803400 |

**IM19**

|    |             |             |             |
|----|-------------|-------------|-------------|
| S  | -3.09389300 | -0.24699200 | -0.71431000 |
| O  | -1.57196300 | -0.31870800 | -1.22185800 |
| O  | -3.91762600 | -1.42529000 | -1.19264700 |
| C  | -3.70329900 | 1.25093100  | -1.72544900 |
| O  | -3.13557500 | 0.19539100  | 0.74618400  |
| Ni | -0.36456400 | -0.23796200 | 0.20417300  |
| F  | -5.00023700 | 1.37902600  | -1.55550900 |
| F  | -3.42078700 | 1.05351400  | -2.99608600 |
| F  | -3.07895300 | 2.33233800  | -1.29147500 |
| C  | -1.55473300 | -3.08853000 | 0.33431400  |
| C  | -0.84712100 | -1.75793400 | 2.24350100  |
| C  | -2.02365600 | -2.08707900 | 2.91091900  |
| C  | -2.95248000 | -2.91250600 | 2.29127000  |
| C  | -2.73478600 | -3.39073100 | 0.99734700  |
| H  | -1.36755400 | -3.46089200 | -0.67051600 |
| H  | -2.21437700 | -1.64839500 | 3.88793100  |
| H  | -3.88071400 | -3.15473100 | 2.80468900  |

|   |             |             |             |
|---|-------------|-------------|-------------|
| H | -3.49840800 | -3.98393200 | 0.50070000  |
| C | 0.00553500  | -0.68923200 | 2.80900900  |
| O | -0.01686400 | -0.26856300 | 3.93467700  |
| N | 0.78759000  | -0.08032700 | 1.74643100  |
| H | 1.63170000  | -0.68092900 | 1.43890900  |
| C | 1.23922100  | 1.28094400  | 1.89929800  |
| C | 0.95384100  | 2.08286100  | 0.77993200  |
| C | 1.98897800  | 1.77382700  | 2.93484300  |
| C | 1.49407000  | 3.38040100  | 0.66476600  |
| C | 2.47526900  | 3.09957200  | 2.85842300  |
| H | 2.21755700  | 1.14888000  | 3.79352300  |
| C | -0.00867000 | 2.17693400  | -1.33491700 |
| C | 1.25238900  | 4.06525700  | -0.54695600 |
| C | 2.25254100  | 3.87963600  | 1.74997300  |
| H | 3.06245000  | 3.49011500  | 3.68627600  |
| C | 0.52533200  | 3.46197200  | -1.54410800 |
| H | -0.60512100 | 1.65883100  | -2.08396400 |
| H | 1.66385300  | 5.06469800  | -0.68453900 |
| H | 2.66516900  | 4.88549700  | 1.68599200  |
| H | 0.34987700  | 3.95791700  | -2.49449100 |
| N | 0.17855000  | 1.53421000  | -0.20007900 |
| C | -0.58978200 | -2.28038800 | 0.94919500  |
| S | 2.71684700  | -0.75983900 | -0.81517300 |
| O | 1.31880200  | -1.09019000 | -1.38389000 |
| O | 3.21057900  | 0.66846300  | -1.01028900 |
| C | 3.90345400  | -1.86900400 | -1.80429500 |
| O | 2.86118900  | -1.31528000 | 0.64021800  |
| H | 0.41027000  | -2.25529300 | 0.49794500  |
| F | 3.88119600  | -1.48672500 | -3.06475900 |
| F | 3.49973700  | -3.11924800 | -1.70334600 |
| F | 5.11881200  | -1.74278300 | -1.31478000 |

**TS19-30**

|    |             |             |             |
|----|-------------|-------------|-------------|
| S  | -3.13417700 | -0.25850300 | -0.68136600 |
| O  | -1.62139200 | -0.26313500 | -1.21720600 |
| O  | -3.93848200 | -1.43057100 | -1.20695100 |
| C  | -3.79559100 | 1.27444600  | -1.60132800 |
| O  | -3.16147600 | 0.10791800  | 0.80032700  |
| Ni | -0.38946500 | -0.23007800 | 0.19498700  |
| F  | -5.09254300 | 1.36127800  | -1.40546700 |
| F  | -3.52960600 | 1.15303900  | -2.88519400 |
| F  | -3.19002200 | 2.34561900  | -1.11901000 |
| C  | -1.54834600 | -3.08866800 | 0.20073100  |
| C  | -0.74155000 | -1.87388800 | 2.14989800  |

|   |             |             |             |
|---|-------------|-------------|-------------|
| C | -1.87855300 | -2.25393900 | 2.85714200  |
| C | -2.83643500 | -3.04513500 | 2.23710400  |
| C | -2.68718700 | -3.44338200 | 0.90657700  |
| H | -1.41526500 | -3.39622200 | -0.83418900 |
| H | -2.01482100 | -1.88415100 | 3.87101800  |
| H | -3.73373400 | -3.32674800 | 2.78452500  |
| H | -3.47229800 | -4.01404700 | 0.41709600  |
| C | 0.15018900  | -0.84571500 | 2.73966600  |
| O | 0.22542300  | -0.55284300 | 3.90586200  |
| N | 0.81799800  | -0.13730400 | 1.68370800  |
| H | 1.73367600  | -0.70991000 | 1.23235100  |
| C | 1.25579400  | 1.21209200  | 1.90302400  |
| C | 0.94438200  | 2.06483200  | 0.82810700  |
| C | 2.01361700  | 1.67098600  | 2.95039200  |
| C | 1.46201400  | 3.37525000  | 0.76439000  |
| C | 2.48131900  | 3.00563100  | 2.92554700  |
| H | 2.25703700  | 1.01260600  | 3.77887300  |
| C | -0.08160400 | 2.25041600  | -1.25209800 |
| C | 1.17629200  | 4.11535600  | -0.40417300 |
| C | 2.23269800  | 3.83452400  | 1.85867000  |
| H | 3.07480200  | 3.36566400  | 3.76294000  |
| C | 0.42703800  | 3.55277800  | -1.40921300 |
| H | -0.69449100 | 1.76230400  | -2.00808200 |
| H | 1.56751600  | 5.12753400  | -0.50213900 |
| H | 2.62826400  | 4.84893100  | 1.83737000  |
| H | 0.21224500  | 4.09634000  | -2.32489200 |
| N | 0.15183100  | 1.55236500  | -0.15862300 |
| C | -0.55719600 | -2.30788600 | 0.81156100  |
| S | 2.70595700  | -0.65925700 | -0.93746800 |
| O | 1.33717500  | -1.01006600 | -1.54314100 |
| O | 3.21174100  | 0.76609300  | -1.09300800 |
| C | 3.95356600  | -1.77974800 | -1.83883200 |
| O | 2.79864000  | -1.21640500 | 0.54361600  |
| H | 0.41725000  | -2.24666100 | 0.31121300  |
| F | 3.97850300  | -1.42217900 | -3.10539800 |
| F | 3.55634900  | -3.02926500 | -1.72565000 |
| F | 5.14085400  | -1.62297300 | -1.29694100 |

**IM30**

|   |             |             |             |
|---|-------------|-------------|-------------|
| S | -3.18216900 | -0.13040600 | -0.86911800 |
| O | -1.64162700 | -0.08896900 | -1.30396800 |
| O | -3.99141300 | -1.10912600 | -1.69495500 |
| C | -3.73177500 | 1.60792100  | -1.42603300 |
| O | -3.29352800 | -0.10951000 | 0.65292500  |

|    |             |             |             |
|----|-------------|-------------|-------------|
| Ni | -0.51995600 | -0.26961500 | 0.20171700  |
| F  | -5.03045100 | 1.72192800  | -1.25397400 |
| F  | -3.42042400 | 1.77782800  | -2.69593700 |
| F  | -3.09810200 | 2.50369100  | -0.68798500 |
| C  | -1.77221800 | -3.04604700 | -0.23421400 |
| C  | -0.86042300 | -2.20699500 | 1.86636700  |
| C  | -1.99104700 | -2.66820900 | 2.53554100  |
| C  | -2.99826200 | -3.30223400 | 1.82298000  |
| C  | -2.90253300 | -3.47506300 | 0.43808400  |
| H  | -1.67834000 | -3.18592000 | -1.30907500 |
| H  | -2.07392800 | -2.49043100 | 3.60565100  |
| H  | -3.89048500 | -3.64356800 | 2.34469300  |
| H  | -3.72031700 | -3.93320200 | -0.11279000 |
| C  | 0.10716800  | -1.33385100 | 2.59429200  |
| O  | 0.34358000  | -1.39695100 | 3.78501100  |
| N  | 0.59456400  | -0.39450200 | 1.69934500  |
| H  | 2.07018800  | -1.05320000 | 0.87784400  |
| C  | 1.13016700  | 0.84036100  | 2.10261000  |
| C  | 0.92211400  | 1.85020500  | 1.13510300  |
| C  | 1.85152700  | 1.13798600  | 3.23934100  |
| C  | 1.49656300  | 3.13153800  | 1.26148500  |
| C  | 2.39171000  | 2.43564200  | 3.39173800  |
| H  | 1.99840000  | 0.37545000  | 3.99874900  |
| C  | -0.02386600 | 2.35201200  | -0.93096800 |
| C  | 1.27497200  | 4.03201100  | 0.19665100  |
| C  | 2.24046500  | 3.40911500  | 2.43282400  |
| H  | 2.95818000  | 2.65727000  | 4.29423700  |
| C  | 0.53478500  | 3.64225700  | -0.89464700 |
| H  | -0.61829000 | 1.99370200  | -1.76925700 |
| H  | 1.70408900  | 5.03238300  | 0.24864100  |
| H  | 2.68286400  | 4.39591800  | 2.56084100  |
| H  | 0.36731100  | 4.31444400  | -1.73155800 |
| N  | 0.14718500  | 1.50333100  | 0.06525100  |
| C  | -0.73718400 | -2.40550700 | 0.46826100  |
| S  | 2.77339000  | -0.46419900 | -1.10528100 |
| O  | 1.48109700  | -0.82312400 | -1.81533100 |
| O  | 3.21495200  | 0.96973800  | -0.92001200 |
| C  | 4.19331200  | -1.41483700 | -1.96470900 |
| O  | 2.86822400  | -1.30782900 | 0.32489100  |
| H  | 0.23128600  | -2.29651200 | -0.03637200 |
| F  | 4.31171700  | -0.92403400 | -3.17549300 |
| F  | 3.86771700  | -2.68261000 | -2.00514500 |
| F  | 5.28875500  | -1.22534600 | -1.27237500 |

**IM31**

|    |             |             |             |
|----|-------------|-------------|-------------|
| S  | 2.47385400  | -0.64855700 | 0.07310700  |
| O  | 1.33858900  | -0.73569100 | -1.05404300 |
| O  | 3.84723500  | -0.36823900 | -0.50259100 |
| C  | 2.50692000  | -2.46809200 | 0.63409700  |
| O  | 1.94961800  | 0.13196800  | 1.27422800  |
| Ni | -0.11974900 | 0.38765900  | -0.62528700 |
| F  | 3.46957800  | -2.63123700 | 1.51377900  |
| F  | 2.70891000  | -3.24076800 | -0.41566100 |
| F  | 1.33908700  | -2.75786300 | 1.18224000  |
| C  | 2.19953100  | 2.28670700  | -1.30492200 |
| C  | 0.20113900  | 2.88105700  | -0.03576700 |
| C  | 0.99831500  | 3.51177800  | 0.91539800  |
| C  | 2.37612800  | 3.51781700  | 0.75753600  |
| C  | 2.98095600  | 2.89346200  | -0.33953500 |
| H  | 2.66029900  | 1.80906300  | -2.16730200 |
| H  | 0.51939800  | 3.97001400  | 1.77842100  |
| H  | 3.00006300  | 3.99504300  | 1.51116200  |
| H  | 4.06447700  | 2.87369300  | -0.42813000 |
| C  | -1.26276000 | 2.69483300  | 0.20744400  |
| O  | -1.98826600 | 3.50559200  | 0.75960700  |
| N  | -1.58128000 | 1.43907400  | -0.22035500 |
| C  | -2.74820600 | 0.75108000  | 0.05667200  |
| C  | -2.59976300 | -0.64390600 | -0.13786400 |
| C  | -3.97532400 | 1.23686800  | 0.47048100  |
| C  | -3.67153800 | -1.54509700 | 0.03817100  |
| C  | -5.04498700 | 0.33496400  | 0.66297600  |
| H  | -4.09933100 | 2.30137000  | 0.64408000  |
| C  | -1.12184300 | -2.34152100 | -0.73476600 |
| C  | -3.39772600 | -2.90896900 | -0.20639800 |
| C  | -4.91840100 | -1.01885400 | 0.45103800  |
| H  | -6.00308800 | 0.73585400  | 0.98942800  |
| C  | -2.13915600 | -3.30306500 | -0.59683000 |
| H  | -0.10782400 | -2.59493500 | -1.03632800 |
| H  | -4.19469700 | -3.64217100 | -0.08274900 |
| H  | -5.75859000 | -1.69444300 | 0.60306800  |
| H  | -1.91107900 | -4.34668000 | -0.79613700 |
| N  | -1.34994900 | -1.06203100 | -0.49974300 |
| C  | 0.80022300  | 2.26492500  | -1.16152400 |
| H  | 0.18364300  | 2.01219400  | -2.03456700 |

**IM32**

|   |            |             |             |
|---|------------|-------------|-------------|
| S | 2.72748700 | -0.04493100 | -0.34894200 |
| O | 3.93723300 | 0.76805300  | 0.06840100  |



|    |             |             |             |
|----|-------------|-------------|-------------|
| O  | 2.11212400  | 0.15042500  | -1.73193300 |
| C  | 3.26395400  | -1.87292700 | -0.28759700 |
| O  | 1.58736300  | -0.05909300 | 0.77310400  |
| Ni | -0.12851400 | 0.42000100  | 0.15258100  |
| C  | 0.02176300  | 4.76055400  | 1.09107800  |
| C  | -0.97852700 | 2.95943800  | -0.13997700 |
| C  | 0.30692000  | 2.45395200  | -0.43719100 |
| C  | 1.44609100  | 3.10897400  | 0.06143800  |
| C  | 1.29740500  | 4.25028500  | 0.83340100  |
| H  | -0.08252900 | 5.66619400  | 1.68672700  |
| H  | 0.44767000  | 1.75152200  | -1.28023200 |
| H  | 2.44092500  | 2.73120900  | -0.17516900 |
| H  | 2.17517400  | 4.75885300  | 1.22602500  |
| C  | -2.18175200 | 2.14594100  | -0.48436100 |
| O  | -3.29282000 | 2.60992000  | -0.68763900 |
| N  | -1.83415600 | 0.82638400  | -0.43062600 |
| C  | -2.72973300 | -0.22890500 | -0.40129400 |
| C  | -2.14923500 | -1.40823800 | 0.12416600  |
| C  | -4.05691800 | -0.26160900 | -0.79180200 |
| C  | -2.87697700 | -2.61120500 | 0.25300700  |
| C  | -4.78259900 | -1.46735200 | -0.67746400 |
| H  | -4.52296100 | 0.64062300  | -1.17492700 |
| C  | -0.23786300 | -2.33276600 | 1.08273800  |
| C  | -2.19616800 | -3.70439300 | 0.83260300  |
| C  | -4.22521200 | -2.62064100 | -0.17511600 |
| H  | -5.82295400 | -1.47333300 | -0.99792500 |
| C  | -0.89397700 | -3.56526600 | 1.25165200  |
| H  | 0.79308300  | -2.17298400 | 1.39049400  |
| H  | -2.71871700 | -4.65342200 | 0.95200700  |
| H  | -4.80631900 | -3.53738900 | -0.08915500 |
| H  | -0.35760200 | -4.39068700 | 1.71175700  |
| N  | -0.84898500 | -1.29880100 | 0.53195000  |
| C  | -1.11522200 | 4.12021400  | 0.61215800  |
| H  | -2.11597600 | 4.48931800  | 0.82833400  |
| F  | 2.27268200  | -2.60914400 | -0.75745100 |
| F  | 3.50894300  | -2.20498200 | 0.96546300  |
| F  | 4.33925400  | -2.03641900 | -1.02317800 |

**TS32-33**

|   |            |             |             |
|---|------------|-------------|-------------|
| S | 2.35202400 | -1.49982200 | 0.04705100  |
| O | 3.71770000 | -1.97120500 | -0.37891300 |
| O | 2.30042200 | -0.37294600 | 1.17532700  |
| C | 1.45649600 | -2.95614600 | 0.90627900  |
| O | 1.35277400 | -1.07956700 | -1.09058700 |

|    |             |             |             |
|----|-------------|-------------|-------------|
| Ni | 0.13869700  | 0.32688900  | -0.50016300 |
| C  | 2.72132400  | 4.25000300  | -0.46841000 |
| C  | 0.85905900  | 2.90266900  | 0.21300500  |
| C  | 1.50275000  | 1.72797000  | -0.22569600 |
| C  | 2.75442400  | 1.86531200  | -0.84417400 |
| C  | 3.36204100  | 3.11417600  | -0.95718800 |
| H  | 3.20223200  | 5.22313500  | -0.55653800 |
| H  | 1.79826500  | 0.59596800  | 0.64404100  |
| H  | 3.28552700  | 0.98528300  | -1.21318700 |
| H  | 4.34156600  | 3.20136100  | -1.42466800 |
| C  | -0.56392500 | 2.77345600  | 0.62855300  |
| O  | -1.22126700 | 3.66029400  | 1.15449000  |
| N  | -1.02508400 | 1.53578700  | 0.25603700  |
| C  | -2.33715800 | 1.11478600  | 0.33608500  |
| C  | -2.54093000 | -0.16405000 | -0.24876800 |
| C  | -3.43263700 | 1.76356700  | 0.88721600  |
| C  | -3.81466800 | -0.77776900 | -0.29247400 |
| C  | -4.69985900 | 1.14496900  | 0.85161100  |
| H  | -3.29707000 | 2.74205200  | 1.33670900  |
| C  | -1.52958200 | -1.94317500 | -1.35364800 |
| C  | -3.88863000 | -2.04047800 | -0.92058400 |
| C  | -4.90828900 | -0.09026900 | 0.28143100  |
| H  | -5.54112900 | 1.67536600  | 1.29526300  |
| C  | -2.75892700 | -2.61840500 | -1.45114600 |
| H  | -0.60627500 | -2.36689300 | -1.74722800 |
| H  | -4.85245800 | -2.54623900 | -0.98092800 |
| H  | -5.89740500 | -0.54515600 | 0.26042600  |
| H  | -2.79795800 | -3.58755600 | -1.94160500 |
| N  | -1.42984000 | -0.75987500 | -0.77373300 |
| C  | 1.45852700  | 4.14852900  | 0.11051000  |
| H  | 0.91058700  | 5.02497500  | 0.45420200  |
| F  | 0.32904600  | -2.50498300 | 1.40189200  |
| F  | 1.22400800  | -3.86786900 | -0.01182000 |
| F  | 2.23423100  | -3.42413900 | 1.84892500  |

### IM33

|    |            |             |             |
|----|------------|-------------|-------------|
| S  | 2.50136700 | -1.35685600 | -0.07035500 |
| O  | 3.87214600 | -1.74742100 | -0.54588000 |
| O  | 2.53339100 | -0.26270000 | 1.16252400  |
| C  | 1.73791200 | -2.81882100 | 0.91746900  |
| O  | 1.42914100 | -0.94399100 | -1.11179400 |
| Ni | 0.06554100 | 0.37528300  | -0.55912500 |
| C  | 2.53131300 | 4.36165900  | -0.16996100 |
| C  | 0.58842200 | 2.99316300  | 0.14073200  |

|   |             |             |             |
|---|-------------|-------------|-------------|
| C | 1.22842500  | 1.87965400  | -0.42932200 |
| C | 2.53343100  | 2.05021400  | -0.90177200 |
| C | 3.17977500  | 3.28537500  | -0.76550100 |
| H | 3.04393500  | 5.31701100  | -0.06877200 |
| H | 2.16796500  | 0.60545800  | 0.80177500  |
| H | 3.06307300  | 1.23644400  | -1.40456600 |
| H | 4.19694800  | 3.40321900  | -1.13792300 |
| C | -0.83777200 | 2.78740300  | 0.49893500  |
| O | -1.56306400 | 3.62779400  | 1.01178800  |
| N | -1.20702700 | 1.51237800  | 0.12888700  |
| C | -2.47126500 | 0.97839900  | 0.24902200  |
| C | -2.56160400 | -0.36581900 | -0.21593100 |
| C | -3.62543100 | 1.57364200  | 0.74144800  |
| C | -3.78280600 | -1.08341800 | -0.19963000 |
| C | -4.83411400 | 0.84977500  | 0.76673600  |
| H | -3.57972100 | 2.59545000  | 1.10103200  |
| C | -1.41536700 | -2.14631400 | -1.16669700 |
| C | -3.75498100 | -2.39885700 | -0.71208000 |
| C | -4.93458400 | -0.44530400 | 0.31231700  |
| H | -5.71988100 | 1.34642200  | 1.16054300  |
| C | -2.58283400 | -2.92799500 | -1.19888500 |
| H | -0.46377700 | -2.52782400 | -1.53763900 |
| H | -4.67521200 | -2.98340100 | -0.71946800 |
| H | -5.88084500 | -0.98376300 | 0.33453000  |
| H | -2.54267600 | -3.93531700 | -1.60560200 |
| N | -1.40412100 | -0.91536700 | -0.68678300 |
| C | 1.21932200  | 4.22009200  | 0.27926200  |
| H | 0.66898300  | 5.04912700  | 0.72347000  |
| F | 0.59664500  | -2.41274500 | 1.40778300  |
| F | 1.56297100  | -3.80288000 | 0.06831000  |
| F | 2.58063100  | -3.14511600 | 1.86047500  |

### IM34

|    |             |             |             |
|----|-------------|-------------|-------------|
| Ni | 0.26630800  | -0.07281500 | -0.03353800 |
| C  | 2.76435900  | 3.94016900  | -0.55194800 |
| C  | 0.85678800  | 2.64866500  | 0.12194900  |
| C  | 1.44607500  | 1.45121800  | -0.30405400 |
| C  | 2.67778200  | 1.54614400  | -0.94995300 |
| C  | 3.32713500  | 2.77857800  | -1.07110800 |
| H  | 3.28692200  | 4.89152100  | -0.63871100 |
| H  | 3.15767800  | 0.67611200  | -1.39160400 |
| H  | 4.28964800  | 2.82344100  | -1.58131500 |
| C  | -0.57629800 | 2.56426300  | 0.46664500  |
| O  | -1.26586800 | 3.49320500  | 0.86629700  |

|   |             |             |             |
|---|-------------|-------------|-------------|
| N | -1.01315700 | 1.28983500  | 0.17703300  |
| C | -2.33168900 | 0.90767800  | 0.20066200  |
| C | -2.52757300 | -0.47249000 | -0.08212500 |
| C | -3.45832800 | 1.69335300  | 0.42702500  |
| C | -3.82816800 | -1.03000000 | -0.19232100 |
| C | -4.74285900 | 1.12558400  | 0.34608100  |
| H | -3.32460300 | 2.74349600  | 0.66210200  |
| C | -1.52049100 | -2.48777300 | -0.59489700 |
| C | -3.91262200 | -2.39254400 | -0.54728300 |
| C | -4.94711800 | -0.19999100 | 0.03695200  |
| H | -5.60146500 | 1.77077100  | 0.52760800  |
| C | -2.76554900 | -3.11558300 | -0.76524800 |
| H | -0.60046800 | -3.05119300 | -0.73144400 |
| H | -4.89491600 | -2.85360000 | -0.65352700 |
| H | -5.94888000 | -0.61985800 | -0.04227200 |
| H | -2.79934900 | -4.16354700 | -1.05236800 |
| N | -1.39283000 | -1.21510400 | -0.25620000 |
| C | 1.50412500  | 3.87578800  | 0.02965100  |
| H | 0.97890200  | 4.76548700  | 0.37738300  |
| C | 1.20580400  | -1.86146800 | 0.67716300  |
| C | 2.08357300  | -0.84255900 | 0.96879400  |
| C | 3.38224800  | -1.18336000 | 0.27850400  |
| C | 1.95168700  | -2.84269100 | -0.20510200 |
| H | 4.09658700  | -0.36656600 | 0.15518000  |
| H | 0.38679800  | -2.16810600 | 1.32732600  |
| H | 2.03415600  | -0.19157700 | 1.83981200  |
| H | 1.34774500  | -3.53847500 | -0.79838600 |
| C | 2.95846500  | -3.53420300 | 0.75114800  |
| H | 2.46536000  | -3.95985800 | 1.63414700  |
| H | 3.47110000  | -4.35556900 | 0.23296500  |
| C | 2.88312800  | -1.90795800 | -0.97761100 |
| H | 2.34419100  | -1.25809900 | -1.67937600 |
| H | 3.68294300  | -2.44234800 | -1.50806300 |
| C | 3.93610100  | -2.38581000 | 1.09534100  |
| H | 3.98308700  | -2.16651200 | 2.16915400  |
| H | 4.95732100  | -2.61551900 | 0.76464800  |

**TS34-35**

|    |            |             |             |
|----|------------|-------------|-------------|
| Ni | 0.12767800 | -0.24779300 | -0.28758000 |
| C  | 2.87731000 | 3.54315400  | -0.90516600 |
| C  | 1.19330100 | 2.23752100  | 0.23947800  |
| C  | 1.73839200 | 1.01751200  | -0.26349400 |
| C  | 2.75434800 | 1.15355500  | -1.22003600 |
| C  | 3.30956300 | 2.39105400  | -1.54497500 |

|   |             |             |             |
|---|-------------|-------------|-------------|
| H | 3.33778900  | 4.50534000  | -1.12272000 |
| H | 3.17565700  | 0.27757800  | -1.70329100 |
| H | 4.10578500  | 2.43769700  | -2.28654200 |
| C | -0.23045200 | 2.31030500  | 0.71257600  |
| O | -0.68201900 | 3.20706400  | 1.41581000  |
| N | -0.91255800 | 1.30144400  | 0.10002400  |
| C | -2.25561000 | 1.05599000  | 0.21649300  |
| C | -2.60506500 | -0.27504600 | -0.16497900 |
| C | -3.27525200 | 1.90600200  | 0.62407400  |
| C | -3.95178800 | -0.71511900 | -0.18262200 |
| C | -4.61066300 | 1.45906500  | 0.61517500  |
| H | -3.02133100 | 2.91048800  | 0.94875100  |
| C | -1.82199000 | -2.35355800 | -0.85729600 |
| C | -4.18554800 | -2.04368200 | -0.59979600 |
| C | -4.96262000 | 0.18937700  | 0.21458300  |
| H | -5.38888500 | 2.15211200  | 0.93246600  |
| C | -3.13158500 | -2.85646800 | -0.94294300 |
| H | -0.95801300 | -2.97611800 | -1.08397800 |
| H | -5.21045200 | -2.41310900 | -0.64079100 |
| H | -6.00279200 | -0.13301900 | 0.20237300  |
| H | -3.28945200 | -3.88305800 | -1.26377200 |
| N | -1.56704000 | -1.10853500 | -0.48943800 |
| C | 1.79270000  | 3.45792100  | -0.03628200 |
| H | 1.32415900  | 4.34848100  | 0.38231000  |
| C | 1.09218100  | -1.64621900 | 0.53698400  |
| C | 1.99461600  | -0.47831900 | 0.74060200  |
| C | 3.36128300  | -1.08012100 | 0.38765800  |
| C | 1.94820500  | -2.79015200 | 0.03609400  |
| H | 4.15278600  | -0.34477300 | 0.20989800  |
| H | 0.40396200  | -1.90225200 | 1.35405500  |
| H | 1.95062900  | 0.00611200  | 1.72174300  |
| H | 1.40805300  | -3.58640300 | -0.49225800 |
| C | 2.75320300  | -3.27430900 | 1.25923000  |
| H | 2.10696400  | -3.51423700 | 2.11351500  |
| H | 3.32673800  | -4.17988800 | 1.01542100  |
| C | 3.02965100  | -2.05654000 | -0.75152300 |
| H | 2.63797900  | -1.59118700 | -1.66368800 |
| H | 3.88433700  | -2.69582000 | -1.01326800 |
| C | 3.68827300  | -2.06975200 | 1.52857400  |
| H | 3.53480900  | -1.61780300 | 2.51751800  |
| H | 4.74491000  | -2.36184500 | 1.46944600  |

**IM35**

|    |            |             |             |
|----|------------|-------------|-------------|
| Ni | 0.10217700 | -0.25913700 | -0.37218800 |
|----|------------|-------------|-------------|

|   |             |             |             |
|---|-------------|-------------|-------------|
| C | 2.74034800  | 3.52084500  | -1.10851200 |
| C | 1.22902800  | 2.17757100  | 0.22930800  |
| C | 1.85887300  | 0.96608200  | -0.20186500 |
| C | 2.83417500  | 1.11702300  | -1.20399800 |
| C | 3.25994100  | 2.36050400  | -1.66196300 |
| H | 3.09807000  | 4.49806700  | -1.42822200 |
| H | 3.33485400  | 0.24483400  | -1.61052100 |
| H | 4.02851300  | 2.41069400  | -2.43149500 |
| C | -0.17190000 | 2.23085400  | 0.79151100  |
| O | -0.56194100 | 3.07835000  | 1.58626000  |
| N | -0.89761200 | 1.28977700  | 0.13264200  |
| C | -2.23758400 | 1.04464800  | 0.28195200  |
| C | -2.61304500 | -0.25544800 | -0.17755900 |
| C | -3.23239200 | 1.87195500  | 0.78445900  |
| C | -3.96416300 | -0.68166300 | -0.17626500 |
| C | -4.57242200 | 1.43866400  | 0.79219600  |
| H | -2.95488000 | 2.84851700  | 1.17043300  |
| C | -1.87869700 | -2.29387300 | -1.03118900 |
| C | -4.22859400 | -1.97671500 | -0.67380700 |
| C | -4.95052400 | 0.20272900  | 0.31666900  |
| H | -5.33181000 | 2.11449500  | 1.18352200  |
| C | -3.19710700 | -2.77572400 | -1.10573000 |
| H | -1.02979500 | -2.90977800 | -1.32278500 |
| H | -5.25884000 | -2.33198200 | -0.70374000 |
| H | -5.99397200 | -0.10926900 | 0.31781500  |
| H | -3.37792000 | -3.77687800 | -1.48877700 |
| N | -1.59717400 | -1.07779800 | -0.59322500 |
| C | 1.70879600  | 3.41473900  | -0.18147800 |
| H | 1.19244100  | 4.29678200  | 0.19577000  |
| C | 1.09786100  | -1.61239900 | 0.43575900  |
| C | 2.00491200  | -0.40230800 | 0.72057700  |
| C | 3.39098500  | -1.05335200 | 0.51739300  |
| C | 2.00829700  | -2.76066800 | 0.05182700  |
| H | 4.20303300  | -0.32593700 | 0.39931000  |
| H | 0.40581000  | -1.87409300 | 1.25163000  |
| H | 1.87959700  | -0.01061800 | 1.73848500  |
| H | 1.52126000  | -3.56595700 | -0.51342100 |
| C | 2.68357300  | -3.22714200 | 1.35658300  |
| H | 1.95306700  | -3.43993500 | 2.14796300  |
| H | 3.26495200  | -4.14519300 | 1.18982400  |
| C | 3.16381100  | -2.04478400 | -0.63678400 |
| H | 2.86242900  | -1.59760100 | -1.59073000 |
| H | 4.03674500  | -2.69111500 | -0.80510500 |
| C | 3.60498400  | -2.02739800 | 1.69208000  |

|   |            |             |            |
|---|------------|-------------|------------|
| H | 3.37077300 | -1.56122200 | 2.65832100 |
| H | 4.65880500 | -2.33347800 | 1.72999700 |

**TS19-20**

|    |             |             |             |
|----|-------------|-------------|-------------|
| S  | -2.89432700 | -1.07256800 | -0.54524800 |
| O  | -1.44448300 | -0.67931300 | -1.12245000 |
| O  | -3.30023300 | -2.48127100 | -0.92616900 |
| C  | -3.97100300 | 0.08562500  | -1.61669200 |
| O  | -3.06149600 | -0.56608000 | 0.88267900  |
| Ni | -0.29635100 | -0.05822900 | 0.21414400  |
| F  | -5.23073700 | -0.26972400 | -1.50315700 |
| F  | -3.58251100 | 0.00299100  | -2.87435100 |
| F  | -3.80868300 | 1.32540800  | -1.18476900 |
| C  | -0.71638100 | -3.03306000 | 0.83486000  |
| C  | -0.06592100 | -1.42526700 | 2.51363900  |
| C  | -0.58934900 | -2.23160600 | 3.51868300  |
| C  | -1.16278200 | -3.45040800 | 3.17348000  |
| C  | -1.22271500 | -3.85175200 | 1.83940100  |
| H  | -0.77679200 | -3.33824600 | -0.20910600 |
| H  | -0.56973100 | -1.88328300 | 4.54972000  |
| H  | -1.58146200 | -4.08914800 | 3.94886000  |
| H  | -1.68775500 | -4.80060500 | 1.57955100  |
| C  | 0.40879800  | -0.07184000 | 2.83696400  |
| O  | 0.40622800  | 0.48068900  | 3.90482900  |
| N  | 0.85177300  | 0.60539800  | 1.60694700  |
| H  | 1.78926500  | 0.23937100  | 1.29180000  |
| C  | 0.90606400  | 2.04634200  | 1.57369600  |
| C  | 0.28295500  | 2.60522900  | 0.44107400  |
| C  | 1.55704100  | 2.84809400  | 2.47533900  |
| C  | 0.34817300  | 3.99461500  | 0.19615200  |
| C  | 1.59408200  | 4.24415900  | 2.25450500  |
| H  | 2.03751900  | 2.41196300  | 3.34643400  |
| C  | -0.89909500 | 2.20708800  | -1.51674200 |
| C  | -0.25586600 | 4.46263000  | -0.99292500 |
| C  | 1.01594900  | 4.80688300  | 1.14274800  |
| H  | 2.10708100  | 4.87531600  | 2.97651900  |
| C  | -0.86231500 | 3.57563400  | -1.84784300 |
| H  | -1.37836400 | 1.46881400  | -2.15686500 |
| H  | -0.22481400 | 5.52729800  | -1.22270700 |
| H  | 1.06875200  | 5.88135700  | 0.97233300  |
| H  | -1.31966700 | 3.90835600  | -2.77533000 |
| N  | -0.36152000 | 1.74832200  | -0.40460700 |
| C  | -0.12431100 | -1.80575100 | 1.15325300  |
| S  | 2.65703800  | -0.68717600 | -1.00599500 |

|   |            |             |             |
|---|------------|-------------|-------------|
| O | 1.76627200 | -1.95856700 | -0.67777200 |
| O | 2.07643100 | 0.23498900  | -2.06322600 |
| C | 4.19928900 | -1.51479300 | -1.75630800 |
| O | 3.16266000 | -0.03908800 | 0.30196500  |
| H | 0.85306600 | -1.69489300 | 0.23675600  |
| F | 3.83717300 | -2.16706600 | -2.83626500 |
| F | 4.70706400 | -2.33317500 | -0.86518400 |
| F | 5.06068000 | -0.56708300 | -2.05505800 |

**IM20**

|    |             |             |             |
|----|-------------|-------------|-------------|
| S  | -2.74236900 | 1.37532900  | 0.19507100  |
| O  | -1.56604900 | 0.37069800  | -0.29003000 |
| O  | -3.96749400 | 0.59693400  | 0.63039100  |
| C  | -3.19752300 | 2.12300100  | -1.50257600 |
| O  | -2.16914400 | 2.51982400  | 1.00521800  |
| Ni | 0.12592100  | 0.46545900  | 0.57102000  |
| F  | -4.27952400 | 2.85402600  | -1.36375700 |
| F  | -3.40896000 | 1.14473900  | -2.35956300 |
| F  | -2.19261600 | 2.87365400  | -1.91856300 |
| C  | -1.66074600 | -0.59144800 | 2.72202400  |
| C  | 0.57743700  | 0.08184000  | 3.24954500  |
| C  | 0.37043700  | -0.15003600 | 4.61339700  |
| C  | -0.86242900 | -0.62576000 | 5.02380000  |
| C  | -1.86464500 | -0.85166700 | 4.07570700  |
| H  | -2.48314900 | -0.75778200 | 2.02715600  |
| H  | 1.17785200  | 0.04313100  | 5.31877900  |
| H  | -1.05342800 | -0.82556300 | 6.07644700  |
| H  | -2.83255100 | -1.23084100 | 4.40221200  |
| C  | 1.86071900  | 0.55392900  | 2.74827600  |
| O  | 2.77811500  | 1.07353000  | 3.32846000  |
| N  | 1.90387300  | 0.29449200  | 1.28649800  |
| H  | 1.91505100  | -0.72658300 | 1.12134300  |
| C  | 2.87587700  | 0.94891900  | 0.44738300  |
| C  | 2.36970800  | 1.33710600  | -0.81374100 |
| C  | 4.19588300  | 1.16005600  | 0.75975600  |
| C  | 3.22678700  | 1.91789200  | -1.77665100 |
| C  | 5.04354700  | 1.77522000  | -0.18949500 |
| H  | 4.57872900  | 0.86382400  | 1.73116100  |
| C  | 0.55092600  | 1.40898900  | -2.24100400 |
| C  | 2.65960100  | 2.23749900  | -3.03107600 |
| C  | 4.58040500  | 2.13768800  | -1.42982900 |
| H  | 6.08498900  | 1.94827500  | 0.07279700  |
| C  | 1.33436000  | 1.97278900  | -3.26736700 |
| H  | -0.50234000 | 1.18420400  | -2.39116200 |



|   |             |             |             |
|---|-------------|-------------|-------------|
| H | 3.28878600  | 2.68515100  | -3.80004900 |
| H | 5.24587600  | 2.59465000  | -2.16132400 |
| H | 0.87493300  | 2.19299400  | -4.22696800 |
| N | 1.04307400  | 1.11982600  | -1.05329200 |
| C | -0.42636400 | -0.11121800 | 2.28556600  |
| S | 0.14026200  | -2.42754000 | -1.05803200 |
| O | -1.33087200 | -2.27857800 | -0.32587400 |
| O | 0.14777100  | -1.73996900 | -2.40651400 |
| C | 0.02598400  | -4.31169900 | -1.33914700 |
| O | 1.28714500  | -2.24177500 | -0.07440100 |
| H | -1.59348100 | -1.30313000 | -0.31791300 |
| F | -0.99455600 | -4.55066800 | -2.12340700 |
| F | -0.12100900 | -4.88822500 | -0.17385100 |
| F | 1.15027300  | -4.68351700 | -1.90658300 |

### IM36

|    |             |             |             |
|----|-------------|-------------|-------------|
| S  | 2.81517500  | -1.45248600 | 0.15687300  |
| O  | 2.93882800  | -2.60354600 | 1.14469900  |
| O  | 2.57571100  | -1.74252500 | -1.32155200 |
| C  | 4.47806500  | -0.52712700 | 0.23657500  |
| O  | 1.83119300  | -0.32134100 | 0.70519200  |
| Ni | 0.37132100  | -0.05847300 | -0.47970300 |
| F  | 5.45467500  | -1.38393800 | 0.02758800  |
| F  | 4.60374700  | 0.02808600  | 1.42486200  |
| F  | 4.48366400  | 0.40298800  | -0.69890300 |
| C  | 1.85265000  | 2.49186000  | -0.28347200 |
| C  | -0.22212800 | 2.41925600  | -1.48452700 |
| C  | -0.21832900 | 3.80943300  | -1.65519100 |
| C  | 0.84643800  | 4.53475500  | -1.15125100 |
| C  | 1.87393800  | 3.87188900  | -0.46953000 |
| H  | 2.64365500  | 2.00877200  | 0.28604900  |
| H  | -1.05119400 | 4.29024100  | -2.16801200 |
| H  | 0.88319000  | 5.61567700  | -1.27297100 |
| H  | 2.70302100  | 4.45212400  | -0.06449800 |
| C  | -1.35231000 | 1.61482500  | -1.92127100 |
| O  | -2.44449500 | 1.95681100  | -2.29373400 |
| N  | -0.97310000 | 0.16600800  | -1.84189600 |
| H  | -0.36939600 | -0.03284800 | -2.64917100 |
| C  | -2.01508200 | -0.82745600 | -1.71479600 |
| C  | -1.75957800 | -1.81673600 | -0.73620000 |
| C  | -3.17551900 | -0.85865700 | -2.44802400 |
| C  | -2.71633900 | -2.82819500 | -0.48650200 |
| C  | -4.13055900 | -1.87001500 | -2.19748000 |
| H  | -3.36695400 | -0.09590300 | -3.19618200 |

|   |             |             |             |
|---|-------------|-------------|-------------|
| C | -0.33037800 | -2.63129400 | 0.89412900  |
| C | -2.40926800 | -3.77336700 | 0.51954800  |
| C | -3.91319200 | -2.83011100 | -1.24057700 |
| H | -5.05037600 | -1.87842100 | -2.77814600 |
| C | -1.22516400 | -3.67646500 | 1.20443700  |
| H | 0.62105800  | -2.53228400 | 1.41889200  |
| H | -3.12277600 | -4.56795700 | 0.73698800  |
| H | -4.65517100 | -3.60500400 | -1.05090400 |
| H | -0.95942700 | -4.38624000 | 1.98289300  |
| N | -0.58370100 | -1.73932600 | -0.04604600 |
| C | 0.80084400  | 1.73796200  | -0.80336000 |
| C | -2.51225300 | 2.07704700  | 1.00090300  |
| C | -2.92078200 | 0.80493300  | 1.09669100  |
| C | -2.35984700 | 0.24932000  | 2.38818800  |
| C | -1.66941500 | 2.37586300  | 2.21921800  |
| H | -2.32345500 | -0.84429100 | 2.47234400  |
| H | -2.83359700 | 2.81553300  | 0.26898900  |
| H | -3.65376800 | 0.30219500  | 0.46562300  |
| H | -0.99491800 | 3.23610600  | 2.13902600  |
| C | -2.66732800 | 2.42995800  | 3.41189700  |
| H | -3.48861900 | 3.13394200  | 3.22984000  |
| H | -2.15157300 | 2.75306200  | 4.32625000  |
| C | -1.02642100 | 1.00539300  | 2.47081800  |
| H | -0.29982900 | 0.71814400  | 1.69724900  |
| H | -0.54742100 | 0.92774700  | 3.45793400  |
| C | -3.14558800 | 0.95979600  | 3.52767100  |
| H | -4.23061200 | 0.85226900  | 3.40623400  |
| H | -2.87741900 | 0.53074600  | 4.50276500  |

**TS36-37**

|    |             |             |             |
|----|-------------|-------------|-------------|
| S  | -1.59071100 | -2.09179600 | -0.51483200 |
| O  | -1.13041200 | -3.19793000 | -1.44990500 |
| O  | -1.16908500 | -2.16219100 | 0.96189400  |
| C  | -3.48962200 | -2.18019800 | -0.45451100 |
| O  | -1.38386400 | -0.64213400 | -1.13182800 |
| Ni | -0.01520900 | 0.21885100  | 0.01150500  |
| F  | -3.84517100 | -3.33037600 | 0.07930700  |
| F  | -3.96365700 | -2.08148300 | -1.67991200 |
| F  | -3.93097800 | -1.18293500 | 0.28425100  |
| C  | -2.47940700 | 1.74055800  | 0.56295100  |
| C  | -0.78415000 | 1.58799900  | 2.26341400  |
| C  | -1.50259000 | 2.44444400  | 3.10294900  |
| C  | -2.72582800 | 2.93238500  | 2.67102300  |
| C  | -3.20951700 | 2.57405300  | 1.40846400  |

|   |             |             |             |
|---|-------------|-------------|-------------|
| H | -2.86754900 | 1.48034700  | -0.42180400 |
| H | -1.08961400 | 2.71163400  | 4.07530500  |
| H | -3.31166500 | 3.58966000  | 3.31098900  |
| H | -4.17457000 | 2.95873200  | 1.07824200  |
| C | 0.54177500  | 1.07342500  | 2.63045800  |
| O | 1.33290600  | 1.52938600  | 3.42315500  |
| N | 0.83644300  | -0.08060400 | 1.80839300  |
| H | 0.10166900  | -0.81077900 | 1.87615500  |
| C | 2.13882200  | -0.64831800 | 1.66015200  |
| C | 2.39010500  | -1.18226400 | 0.36990600  |
| C | 3.09038400  | -0.74627400 | 2.64615800  |
| C | 3.59165800  | -1.88542900 | 0.11655500  |
| C | 4.31139100  | -1.40308400 | 2.37316800  |
| H | 2.89541700  | -0.31600900 | 3.62402900  |
| C | 1.62024100  | -1.53146800 | -1.78850500 |
| C | 3.75020400  | -2.44597400 | -1.17242300 |
| C | 4.55299100  | -1.97865100 | 1.15017600  |
| H | 5.05810400  | -1.47170300 | 3.16139800  |
| C | 2.76450700  | -2.28730300 | -2.11316100 |
| H | 0.82168300  | -1.37097700 | -2.51256400 |
| H | 4.65670200  | -3.00655000 | -1.40023900 |
| H | 5.48484100  | -2.50899100 | 0.95682500  |
| H | 2.85150700  | -2.72337400 | -3.10454400 |
| N | 1.44877400  | -0.98194100 | -0.60250100 |
| C | -1.24895100 | 1.24262300  | 0.98260400  |
| C | 0.62628500  | 2.80335600  | -0.65643900 |
| C | 1.60155000  | 2.00396800  | -1.13268600 |
| C | 1.42488700  | 1.93283600  | -2.63327900 |
| C | -0.19970600 | 3.25828000  | -1.83457700 |
| H | 1.91907400  | 1.09688100  | -3.14216400 |
| H | 0.55653800  | 3.22436800  | 0.34433500  |
| H | 2.48559700  | 1.66864400  | -0.59134600 |
| H | -1.20025200 | 3.63730300  | -1.60246400 |
| C | 0.71735000  | 4.25491700  | -2.60086900 |
| H | 1.10059600  | 5.04779300  | -1.94686700 |
| H | 0.15654600  | 4.73947600  | -3.41107000 |
| C | -0.10251300 | 2.03386500  | -2.75382800 |
| H | -0.63862900 | 1.15526700  | -2.36950000 |
| H | -0.43412600 | 2.24528300  | -3.78057600 |
| C | 1.83519800  | 3.33861600  | -3.15945300 |
| H | 2.83744400  | 3.62969800  | -2.82148200 |
| H | 1.84291300  | 3.34393500  | -4.25755200 |

IM37

|    |             |             |             |
|----|-------------|-------------|-------------|
| S  | -1.88336798 | -1.83956602 | -0.43174088 |
| O  | -1.50389403 | -3.07707906 | -1.22538083 |
| O  | -1.59121193 | -1.81039395 | 1.07450811  |
| C  | -3.77321998 | -1.67802198 | -0.54985282 |
| O  | -1.45606597 | -0.48733206 | -1.14395596 |
| Ni | 0.02467807  | 0.50407794  | -0.39199305 |
| F  | -4.32678998 | -2.76574495 | -0.05654675 |
| F  | -4.10387202 | -1.53398604 | -1.81691682 |
| F  | -4.14703493 | -0.62260294 | 0.14160214  |
| C  | -2.35662288 | 2.17576201  | -0.04757106 |
| C  | -0.92666383 | 1.78470608  | 1.86399391  |
| C  | -1.76829079 | 2.56393913  | 2.66132790  |
| C  | -2.91470079 | 3.12302013  | 2.11380491  |
| C  | -3.20966284 | 2.91984607  | 0.76518993  |
| H  | -2.58262492 | 2.03247196  | -1.10436505 |
| H  | -1.51264275 | 2.70931618  | 3.71065689  |
| H  | -3.58204976 | 3.71797417  | 2.73456290  |
| H  | -4.11309685 | 3.35490807  | 0.33844994  |
| C  | 0.31707618  | 1.18081508  | 2.42025590  |
| O  | 1.10123521  | 1.74894210  | 3.15850485  |
| N  | 0.52800613  | -0.09193095 | 1.90476296  |
| H  | -0.29815389 | -0.63702295 | 1.61195801  |
| C  | 1.75285312  | -0.77276798 | 1.85367395  |
| C  | 2.06432507  | -1.41065305 | 0.61679797  |
| C  | 2.63489415  | -0.85722495 | 2.90736293  |
| C  | 3.20440705  | -2.25156808 | 0.53831298  |
| C  | 3.80958713  | -1.62908098 | 2.79154193  |
| H  | 2.39855119  | -0.33162390 | 3.82838791  |
| C  | 1.48034798  | -1.88013914 | -1.57615698 |
| C  | 3.40953299  | -2.96033114 | -0.66811699 |
| C  | 4.07622408  | -2.34105304 | 1.64863196  |
| H  | 4.48824516  | -1.68653195 | 3.64011091  |
| C  | 2.52998396  | -2.80939717 | -1.70859797 |
| H  | 0.80050596  | -1.68830117 | -2.40591097 |
| H  | 4.26516298  | -3.63099416 | -0.74737699 |
| H  | 4.95625006  | -2.97926106 | 1.57704096  |
| H  | 2.64221492  | -3.36247122 | -2.63708695 |
| N  | 1.27154003  | -1.18104709 | -0.47770201 |
| C  | -1.21420288 | 1.60933201  | 0.50241593  |
| C  | 0.77250010  | 2.50959491  | -0.83563618 |
| C  | 1.78678509  | 1.62422590  | -0.51627817 |
| C  | 2.50060004  | 1.32226382  | -1.82090717 |
| C  | 0.82659606  | 2.73882583  | -2.32618619 |
| H  | 3.12871802  | 0.42403481  | -1.83064915 |

|   |             |            |             |
|---|-------------|------------|-------------|
| H | 0.35475414  | 3.24788395 | -0.15673420 |
| H | 2.27755512  | 1.57348994 | 0.45762982  |
| H | -0.08446795 | 3.13450083 | -2.78620618 |
| C | 2.09532207  | 3.61883680 | -2.50776227 |
| H | 2.08169411  | 4.50570383 | -1.86172932 |
| H | 2.15964404  | 3.97127875 | -3.54542129 |
| C | 1.34933701  | 1.39364880 | -2.83514314 |
| H | 0.60530800  | 0.58946282 | -2.75026308 |
| H | 1.70671698  | 1.44411974 | -3.87280715 |
| C | 3.24821606  | 2.63896979 | -2.16769026 |
| H | 3.87487209  | 2.98633482 | -1.33696730 |
| H | 3.90634303  | 2.48106273 | -3.03216928 |

**TS37-38**

|    |             |             |             |
|----|-------------|-------------|-------------|
| S  | -1.77435400 | -1.86602100 | -0.51531400 |
| O  | -1.34863200 | -2.98871400 | -1.44687100 |
| O  | -1.43454000 | -1.99015600 | 0.97728200  |
| C  | -3.67468100 | -1.82031700 | -0.56327300 |
| O  | -1.45239700 | -0.42172500 | -1.06531000 |
| Ni | 0.14381300  | 0.51171500  | -0.38193700 |
| F  | -4.14281400 | -2.98449300 | -0.16254100 |
| F  | -4.05922600 | -1.57800200 | -1.80046500 |
| F  | -4.09532300 | -0.86395200 | 0.23812800  |
| C  | -2.17835100 | 2.28354700  | 0.15280400  |
| C  | -0.78803100 | 1.55350800  | 1.99133000  |
| C  | -1.74632700 | 1.98953300  | 2.89938600  |
| C  | -2.93449400 | 2.54839700  | 2.43703500  |
| C  | -3.15108800 | 2.68171000  | 1.06788100  |
| H  | -2.35318900 | 2.39262400  | -0.91793900 |
| H  | -1.55960400 | 1.87480800  | 3.96690300  |
| H  | -3.69242700 | 2.87849700  | 3.14485500  |
| H  | -4.08727200 | 3.10435500  | 0.70528400  |
| C  | 0.50941600  | 0.94170500  | 2.43069700  |
| O  | 1.36698100  | 1.53027100  | 3.06373500  |
| N  | 0.65678000  | -0.33239900 | 1.91964300  |
| H  | -0.18674900 | -0.82326600 | 1.58486200  |
| C  | 1.86718500  | -1.01218200 | 1.70492900  |
| C  | 2.12482700  | -1.47615400 | 0.37940200  |
| C  | 2.77224500  | -1.27796500 | 2.70685600  |
| C  | 3.22635400  | -2.34332300 | 0.15278000  |
| C  | 3.91264400  | -2.06640700 | 2.45252200  |
| H  | 2.57426100  | -0.88844500 | 3.70210400  |
| C  | 1.49464400  | -1.60353100 | -1.85568100 |
| C  | 3.38173300  | -2.88219300 | -1.14495400 |

|   |             |             |             |
|---|-------------|-------------|-------------|
| C | 4.11764700  | -2.62253600 | 1.21469800  |
| H | 4.60992400  | -2.26753000 | 3.26314700  |
| C | 2.50174500  | -2.54413600 | -2.13956200 |
| H | 0.80673000  | -1.26344300 | -2.62986200 |
| H | 4.20444500  | -3.57164700 | -1.33417700 |
| H | 4.96675200  | -3.27908500 | 1.02784300  |
| H | 2.58003500  | -2.96179700 | -3.13937300 |
| N | 1.32706600  | -1.06967300 | -0.66060400 |
| C | -0.99402900 | 1.71286100  | 0.60671600  |
| C | 0.71716100  | 2.59282000  | -0.23147600 |
| C | 1.71953100  | 1.65802100  | -0.59925000 |
| C | 1.96747900  | 1.87491400  | -2.08186500 |
| C | 0.37454200  | 3.35344300  | -1.49470800 |
| H | 2.46247400  | 1.05077700  | -2.60881300 |
| H | 0.77328000  | 3.12504800  | 0.71682400  |
| H | 2.53064900  | 1.38115100  | 0.07914300  |
| H | -0.57783800 | 3.89309400  | -1.48003400 |
| C | 1.61762800  | 4.24634800  | -1.74013200 |
| H | 1.89609800  | 4.81994500  | -0.84658800 |
| H | 1.40439100  | 4.97061800  | -2.53661000 |
| C | 0.57102800  | 2.28633100  | -2.57711700 |
| H | -0.17902400 | 1.48163300  | -2.54251000 |
| H | 0.59417000  | 2.71337300  | -3.58906100 |
| C | 2.70740200  | 3.23171900  | -2.17153600 |
| H | 3.59698800  | 3.25988200  | -1.52959000 |
| H | 3.03961700  | 3.41615900  | -3.20211400 |

### IM38

|    |             |             |             |
|----|-------------|-------------|-------------|
| S  | -2.40440500 | -0.99327200 | -0.56430000 |
| O  | -2.31816700 | -1.92104300 | -1.76623900 |
| O  | -2.12521000 | -1.58115100 | 0.82657700  |
| C  | -4.21585200 | -0.42211400 | -0.48052600 |
| O  | -1.68744300 | 0.39259500  | -0.76521900 |
| Ni | 0.23250200  | 0.52657300  | -0.32550400 |
| F  | -4.99329900 | -1.47823900 | -0.35362700 |
| F  | -4.51130700 | 0.22668900  | -1.58789300 |
| F  | -4.36777600 | 0.37449000  | 0.56233100  |
| C  | -0.65008600 | 3.30498400  | 0.35470200  |
| C  | -0.07456500 | 1.47129400  | 1.82398600  |
| C  | -1.37390000 | 1.49822500  | 2.33930200  |
| C  | -2.29110900 | 2.43151600  | 1.88317500  |
| C  | -1.93274200 | 3.32638600  | 0.87729900  |
| H  | -0.38365900 | 4.01065500  | -0.42983500 |
| H  | -1.66231200 | 0.77171300  | 3.09820300  |

|             |             |             |             |
|-------------|-------------|-------------|-------------|
| H           | -3.29983400 | 2.44183300  | 2.29097800  |
| H           | -2.65997800 | 4.03993100  | 0.49524000  |
| C           | 0.88987600  | 0.40317500  | 2.27421700  |
| O           | 1.99786300  | 0.62664200  | 2.71865500  |
| N           | 0.40130000  | -0.87251100 | 2.03236900  |
| H           | -0.54237300 | -0.94796300 | 1.62850800  |
| C           | 1.26953300  | -1.89055700 | 1.57869700  |
| C           | 1.35362100  | -2.14663800 | 0.17504100  |
| C           | 2.00121700  | -2.65344100 | 2.45686300  |
| C           | 2.07725300  | -3.29070600 | -0.26168100 |
| C           | 2.78617700  | -3.73297900 | 2.00622700  |
| H           | 1.93114000  | -2.41867900 | 3.51654600  |
| C           | 0.74103400  | -1.65731700 | -2.01973500 |
| C           | 2.05524500  | -3.60872500 | -1.63810400 |
| C           | 2.79549400  | -4.06791800 | 0.67696200  |
| H           | 3.35054000  | -4.32210500 | 2.72576000  |
| C           | 1.36124000  | -2.81702500 | -2.51400400 |
| H           | 0.21514900  | -0.97931700 | -2.69093200 |
| H           | 2.58992100  | -4.49435200 | -1.98124900 |
| H           | 3.35368100  | -4.93272000 | 0.31966500  |
| H           | 1.29867600  | -3.04780800 | -3.57354500 |
| N           | 0.76019000  | -1.31277800 | -0.74255200 |
| C           | 0.32240900  | 2.40107400  | 0.81934900  |
| C           | 1.78629700  | 2.44234800  | 0.35540500  |
| C           | 2.05852400  | 1.07421000  | -0.28259500 |
| C           | 2.50749900  | 1.38688000  | -1.70055800 |
| C           | 2.10382300  | 3.40741300  | -0.79718500 |
| H           | 2.44983200  | 0.54166600  | -2.39955600 |
| H           | 2.41735900  | 2.63406000  | 1.23487800  |
| H           | 2.70934500  | 0.39276100  | 0.27831600  |
| H           | 1.69234500  | 4.41734700  | -0.67640700 |
| C           | 3.63231700  | 3.39746000  | -0.97294700 |
| H           | 4.15355900  | 3.55133700  | -0.01913000 |
| H           | 3.94224100  | 4.20598100  | -1.64789300 |
| C           | 1.66128300  | 2.62175200  | -2.04099300 |
| H           | 0.58120200  | 2.41423300  | -2.08824100 |
| H           | 1.96599100  | 3.10555400  | -2.97968100 |
| C           | 3.91592600  | 2.00803300  | -1.59703300 |
| H           | 4.58967500  | 1.39333200  | -0.98609500 |
| H           | 4.36950700  | 2.10109000  | -2.59401500 |
| <b>IM40</b> |             |             |             |
| S           | 1.93909500  | 2.34221000  | 0.08529500  |
| O           | 1.01112000  | 2.72724100  | 1.24634200  |

|    |             |             |             |
|----|-------------|-------------|-------------|
| O  | 3.41506600  | 2.65302400  | 0.19509400  |
| C  | 1.31716900  | 3.42427800  | -1.41589900 |
| O  | 1.70057600  | 0.86313100  | -0.41569700 |
| Ni | 0.04282000  | -0.00673200 | -0.77945000 |
| F  | 0.97568800  | 2.62760500  | -2.42221000 |
| F  | 2.28553800  | 4.22253700  | -1.79830900 |
| F  | 0.26661400  | 4.13409400  | -1.04982000 |
| C  | 4.00020700  | -1.02026600 | 1.26821600  |
| C  | 1.82511500  | -0.67319500 | 2.17183800  |
| C  | 2.37206100  | 0.15064900  | 3.15809000  |
| C  | 3.74024400  | 0.36744700  | 3.22407100  |
| C  | 4.55086100  | -0.22230700 | 2.26560800  |
| H  | 4.67295400  | -1.42716700 | 0.51895400  |
| H  | 1.70764900  | 0.62145800  | 3.88213300  |
| H  | 4.16041500  | 1.00404500  | 3.99928000  |
| H  | 5.62526500  | -0.04789900 | 2.27527200  |
| C  | 0.35264300  | -0.79590800 | 2.13370800  |
| O  | -0.22952100 | -1.89887300 | 2.11053800  |
| N  | -0.30333500 | 0.39482800  | 2.11154300  |
| H  | 0.25771600  | 1.23702900  | 1.89709500  |
| C  | -1.70132200 | 0.53600700  | 1.98138500  |
| C  | -2.24424100 | 1.16954600  | 0.81970800  |
| C  | -2.54263500 | 0.10467600  | 2.98612300  |
| C  | -3.64310500 | 1.43447200  | 0.79253800  |
| C  | -3.93365600 | 0.31336000  | 2.91410000  |
| H  | -2.10129700 | -0.38148400 | 3.85431500  |
| C  | -1.97489500 | 2.09982600  | -1.27666800 |
| C  | -4.16420600 | 2.11700400  | -0.33025900 |
| C  | -4.47047600 | 0.99167600  | 1.85021400  |
| H  | -4.56987800 | -0.03776400 | 3.72334700  |
| C  | -3.32885800 | 2.47777500  | -1.35258600 |
| H  | -1.30547700 | 2.30292000  | -2.11167300 |
| H  | -5.23007600 | 2.34171300  | -0.36335300 |
| H  | -5.53979400 | 1.19305800  | 1.79633600  |
| H  | -3.69082700 | 3.01253000  | -2.22698100 |
| N  | -1.44308100 | 1.46290600  | -0.25052300 |
| C  | 2.63116900  | -1.28181500 | 1.18599000  |
| C  | 2.05500200  | -2.19445500 | 0.10691400  |
| C  | 1.01283200  | -1.65161700 | -0.93541900 |
| C  | 1.73588800  | -1.71357400 | -2.29080100 |
| C  | 3.11503300  | -2.75630200 | -0.86567100 |
| H  | 1.37851900  | -0.97777100 | -3.02210900 |
| H  | 1.56746900  | -3.01938800 | 0.65091300  |
| H  | 0.15102600  | -2.34143500 | -0.94815400 |



|    |             |             |             |
|----|-------------|-------------|-------------|
| H  | 4.04428200  | -3.06744500 | -0.37460700 |
| C  | 2.49824900  | -3.89978200 | -1.69580600 |
| H  | 1.90210200  | -4.57850300 | -1.06893600 |
| H  | 3.28918600  | -4.50397600 | -2.15919000 |
| C  | 3.21218000  | -1.62353300 | -1.89582600 |
| H  | 3.48002300  | -0.65210100 | -1.46353900 |
| H  | 3.88888600  | -1.85394600 | -2.73136400 |
| C  | 1.64697800  | -3.16934300 | -2.76476000 |
| H  | 0.61013800  | -3.53001500 | -2.81906200 |
| H  | 2.08662500  | -3.28044900 | -3.76715500 |
| C  | -3.09429800 | -1.13928600 | -3.45447800 |
| H  | -4.01319300 | -1.73032000 | -3.47233900 |
| H  | -2.40833900 | -1.48129400 | -4.23720400 |
| H  | -3.32881800 | -0.08894900 | -3.66934200 |
| C  | -2.41183800 | -1.22431600 | -2.11137500 |
| O  | -3.01774300 | -1.83074600 | -1.18591300 |
| O  | -1.28370200 | -0.66191300 | -2.03857200 |
| Ag | -1.84016300 | -1.99155300 | 0.60840600  |

**TS40-41**

|    |             |             |             |
|----|-------------|-------------|-------------|
| S  | -0.94475600 | 2.64135900  | -1.62950200 |
| O  | -0.10390700 | 2.81038300  | -0.33092600 |
| O  | -0.66128400 | 3.65085500  | -2.72358200 |
| C  | -2.70632000 | 3.02676800  | -1.01536200 |
| O  | -1.09384000 | 1.16109000  | -2.04715000 |
| Ni | -0.10919200 | -0.60610500 | -0.53847700 |
| F  | -3.56995600 | 2.88213600  | -2.00279600 |
| F  | -2.77108200 | 4.25313100  | -0.53780500 |
| F  | -3.01034900 | 2.16279300  | -0.04507300 |
| C  | 4.51254500  | 1.81171100  | 1.51238900  |
| C  | 2.23722200  | 1.07671700  | 1.69828700  |
| C  | 1.97950000  | 2.03701100  | 2.66959000  |
| C  | 3.00592200  | 2.88680600  | 3.06838000  |
| C  | 4.27250800  | 2.75979900  | 2.50303200  |
| H  | 5.49882600  | 1.74067900  | 1.05428800  |
| H  | 0.98421900  | 2.14445100  | 3.10032100  |
| H  | 2.81755700  | 3.65248600  | 3.81853700  |
| H  | 5.07549800  | 3.42308900  | 2.82022600  |
| C  | 1.29337000  | -0.02019600 | 1.30937200  |
| O  | 1.38102400  | -1.10359000 | 1.99795800  |
| N  | -0.05615100 | 0.45413100  | 0.98807200  |
| H  | -0.07132000 | 1.44084800  | 0.60607100  |
| C  | -1.19601400 | 0.13710000  | 1.80735300  |
| C  | -2.25719000 | -0.45471800 | 1.09502200  |

|    |             |             |             |
|----|-------------|-------------|-------------|
| C  | -1.35441500 | 0.43526600  | 3.13623900  |
| C  | -3.52963300 | -0.62818000 | 1.67769800  |
| C  | -2.60629500 | 0.20135700  | 3.75328300  |
| H  | -0.52938200 | 0.85138700  | 3.71064100  |
| C  | -2.94515800 | -1.28416600 | -0.95528900 |
| C  | -4.54746600 | -1.13246500 | 0.83503900  |
| C  | -3.67674400 | -0.28953800 | 3.04398300  |
| H  | -2.72273100 | 0.44243100  | 4.80761000  |
| C  | -4.26280900 | -1.43411200 | -0.47522100 |
| H  | -2.66540600 | -1.53194900 | -1.97821600 |
| H  | -5.55190300 | -1.27020000 | 1.23429900  |
| H  | -4.64393300 | -0.43141600 | 3.52435400  |
| H  | -5.03191700 | -1.80353700 | -1.14801900 |
| N  | -1.97979300 | -0.83501600 | -0.18323300 |
| C  | 3.48000900  | 0.97784700  | 1.09545400  |
| C  | 3.52995500  | -0.00874700 | -0.03275300 |
| C  | 2.07118100  | -0.41078300 | -0.48234900 |
| C  | 1.98253000  | 0.25229900  | -1.89630800 |
| C  | 4.11284100  | 0.62536700  | -1.30785700 |
| H  | 0.98154600  | 0.48705800  | -2.27189300 |
| H  | 4.09169000  | -0.90920700 | 0.26387700  |
| H  | 2.03926300  | -1.51301600 | -0.54738300 |
| H  | 5.04298100  | 1.17396700  | -1.11287200 |
| C  | 4.24065500  | -0.45059800 | -2.39309300 |
| H  | 4.71051800  | -1.36608600 | -2.00572000 |
| H  | 4.86499800  | -0.09476400 | -3.22297300 |
| C  | 2.92157000  | 1.45321400  | -1.78969300 |
| H  | 2.57768000  | 2.21459100  | -1.07763600 |
| H  | 3.08493800  | 1.93079600  | -2.76519000 |
| C  | 2.77450200  | -0.66769900 | -2.84019500 |
| H  | 2.44351400  | -1.71275400 | -2.77992100 |
| H  | 2.62068800  | -0.33947400 | -3.87767600 |
| C  | -0.34386900 | -3.89227200 | -3.16518800 |
| H  | -0.56671300 | -4.94774900 | -2.99060600 |
| H  | 0.59545300  | -3.80746900 | -3.72600200 |
| H  | -1.12263800 | -3.43043300 | -3.78227200 |
| C  | -0.20211500 | -3.14200900 | -1.86505100 |
| O  | -0.17525600 | -3.81485300 | -0.79958500 |
| O  | -0.11506000 | -1.88155300 | -1.97754100 |
| Ag | 0.45729900  | -2.81753700 | 1.02678200  |

#### IM41

|   |             |            |             |
|---|-------------|------------|-------------|
| S | -0.91878900 | 2.73496800 | -1.55816100 |
| O | -0.00114000 | 2.81387900 | -0.31121300 |

|    |             |             |             |
|----|-------------|-------------|-------------|
| O  | -0.62176400 | 3.72067200  | -2.67030300 |
| C  | -2.61082900 | 3.24110800  | -0.84837100 |
| O  | -1.20285000 | 1.27215800  | -1.99491900 |
| Ni | -0.49806800 | -0.58333900 | -0.77584300 |
| F  | -3.53462600 | 3.15356600  | -1.78632700 |
| F  | -2.55663200 | 4.47240700  | -0.38279000 |
| F  | -2.91866800 | 2.40953500  | 0.14461700  |
| C  | 4.90359900  | 1.55468900  | 1.10920500  |
| C  | 2.62463300  | 0.81602800  | 1.47612200  |
| C  | 2.45525600  | 1.81067100  | 2.43616500  |
| C  | 3.51871100  | 2.65220400  | 2.74888400  |
| C  | 4.74693100  | 2.51071400  | 2.10694100  |
| H  | 5.84608500  | 1.46932700  | 0.56686300  |
| H  | 1.49441400  | 1.97855100  | 2.91754700  |
| H  | 3.38298200  | 3.43416400  | 3.49411900  |
| H  | 5.57384300  | 3.17047000  | 2.36454000  |
| C  | 1.67745300  | -0.29142900 | 1.01675800  |
| O  | 1.57483900  | -1.31306200 | 1.87279900  |
| N  | 0.22626000  | 0.29180700  | 0.76431400  |
| H  | 0.24654900  | 1.29914300  | 0.46815600  |
| C  | -0.71350700 | 0.12514700  | 1.84773500  |
| C  | -1.99608300 | -0.29063400 | 1.44348300  |
| C  | -0.49196900 | 0.30588000  | 3.19349200  |
| C  | -3.09403700 | -0.34328100 | 2.33271700  |
| C  | -1.56727400 | 0.21431900  | 4.10744800  |
| H  | 0.50893600  | 0.49295700  | 3.56512600  |
| C  | -3.29464900 | -1.01458500 | -0.35262400 |
| C  | -4.34435500 | -0.70752700 | 1.78533200  |
| C  | -2.84743100 | -0.06529700 | 3.69581600  |
| H  | -1.36402000 | 0.38266300  | 5.16290300  |
| C  | -4.44993600 | -1.01778000 | 0.45021700  |
| H  | -3.31302300 | -1.28145000 | -1.40740900 |
| H  | -5.21892000 | -0.73995700 | 2.43450800  |
| H  | -3.67061000 | -0.10863900 | 4.40734900  |
| H  | -5.40350000 | -1.28736200 | 0.00499500  |
| N  | -2.11843300 | -0.68932700 | 0.14608700  |
| C  | 3.83413300  | 0.72709100  | 0.78698600  |
| C  | 3.77180100  | -0.23910000 | -0.35786200 |
| C  | 2.28891900  | -0.72135200 | -0.36100800 |
| C  | 1.77056800  | -0.14706900 | -1.69571100 |
| C  | 3.92147000  | 0.44423700  | -1.73007300 |
| H  | 0.69292700  | 0.07207500  | -1.88853600 |
| H  | 4.48723300  | -1.06763500 | -0.24472600 |
| H  | 2.23842200  | -1.82106000 | -0.39065900 |

|    |             |             |             |
|----|-------------|-------------|-------------|
| H  | 4.80734100  | 1.08769400  | -1.79993200 |
| C  | 3.83877300  | -0.64162700 | -2.81521500 |
| H  | 4.49317800  | -1.49464600 | -2.58936100 |
| H  | 4.14488200  | -0.24427600 | -3.79126800 |
| C  | 2.57056600  | 1.15089000  | -1.87450900 |
| H  | 2.35983200  | 1.90876300  | -1.11034000 |
| H  | 2.41006700  | 1.60000400  | -2.86378200 |
| C  | 2.33534700  | -1.02779100 | -2.81684100 |
| H  | 2.15792100  | -2.09678700 | -2.62979500 |
| H  | 1.85496400  | -0.77707500 | -3.77149000 |
| C  | -1.45258600 | -3.83601700 | -3.13201000 |
| H  | -1.71423300 | -4.85422500 | -2.83322700 |
| H  | -0.61080300 | -3.87831800 | -3.83495400 |
| H  | -2.28490800 | -3.35592300 | -3.65651800 |
| C  | -1.03595000 | -3.01757100 | -1.93875300 |
| O  | -0.73462300 | -3.61647400 | -0.88057000 |
| O  | -1.01710600 | -1.75451100 | -2.14321600 |
| Ag | 0.37713500  | -2.78689700 | 0.83534500  |

#### IM42

|    |            |             |             |
|----|------------|-------------|-------------|
| S  | 6.00570000 | -1.03113600 | 0.17496200  |
| O  | 5.70944300 | -0.00798400 | -0.96349700 |
| O  | 7.10320000 | -0.63315000 | 1.14532100  |
| C  | 6.71363800 | -2.51181200 | -0.79206600 |
| O  | 4.70937200 | -1.62732500 | 0.76340000  |
| Ni | 2.46145600 | -0.42517900 | 0.75436400  |
| F  | 7.03282600 | -3.47614600 | 0.05149100  |
| F  | 7.78342600 | -2.14275900 | -1.47168800 |
| F  | 5.78944200 | -2.95767000 | -1.63440900 |
| C  | 3.62172400 | 4.36504800  | -0.99568000 |
| C  | 2.73692200 | 2.26500200  | -1.65958500 |
| C  | 2.78593500 | 2.67918600  | -2.99967100 |
| C  | 3.30281300 | 3.91670800  | -3.34132400 |
| C  | 3.71611600 | 4.76620800  | -2.31961200 |
| H  | 3.90317400 | 5.07808800  | -0.22496700 |
| H  | 2.40178300 | 2.00571100  | -3.76726000 |
| H  | 3.36344100 | 4.22144800  | -4.38432500 |
| H  | 4.10145800 | 5.75767700  | -2.55213400 |
| C  | 2.14652100 | 0.91464900  | -1.51663500 |
| O  | 1.01278300 | 0.65898200  | -1.88838200 |
| N  | 3.01662400 | -0.11878400 | -1.09680200 |
| H  | 4.03545600 | 0.14415000  | -1.03345400 |
| C  | 2.87673600 | -1.34087900 | -1.85310100 |
| C  | 2.27376300 | -2.43479500 | -1.21127500 |

|   |             |             |             |
|---|-------------|-------------|-------------|
| C | 3.31386800  | -1.44221900 | -3.14819100 |
| C | 2.09634800  | -3.65298400 | -1.91045000 |
| C | 3.14206600  | -2.65521400 | -3.85054900 |
| H | 3.81102300  | -0.59305000 | -3.61721100 |
| C | 1.34792800  | -3.27522100 | 0.71850000  |
| C | 1.47923200  | -4.71045000 | -1.20283000 |
| C | 2.54166900  | -3.73596100 | -3.25074500 |
| H | 3.49945700  | -2.72996300 | -4.87531300 |
| C | 1.10701100  | -4.52317300 | 0.10378900  |
| H | 1.07098100  | -3.10852800 | 1.75814900  |
| H | 1.31521600  | -5.66477200 | -1.70331700 |
| H | 2.41323900  | -4.67307900 | -3.79161100 |
| H | 0.62501700  | -5.30892300 | 0.68057100  |
| N | 1.90185300  | -2.26411000 | 0.08543300  |
| C | 3.15730300  | 3.09579600  | -0.61443200 |
| C | 2.95341700  | 2.80628100  | 0.86494200  |
| C | 2.80149800  | 1.36580200  | 1.46456400  |
| C | 4.06015700  | 1.18665200  | 2.34943700  |
| C | 4.12864700  | 3.33580200  | 1.73105800  |
| H | 4.38992300  | 0.15089600  | 2.47321300  |
| H | 2.03166800  | 3.36530000  | 1.11885500  |
| H | 1.90403400  | 1.40217800  | 2.10201000  |
| H | 4.55278400  | 4.28300700  | 1.38253900  |
| C | 3.69275300  | 3.39436400  | 3.20627500  |
| H | 2.68312500  | 3.81874300  | 3.31585500  |
| H | 4.37522100  | 4.03344800  | 3.78228300  |
| C | 5.06944200  | 2.13313100  | 1.70161900  |
| H | 5.37042600  | 1.83656600  | 0.68644000  |
| H | 5.97618000  | 2.26242500  | 2.30769200  |
| C | 3.77340100  | 1.91795800  | 3.66653000  |
| H | 2.85003900  | 1.56444300  | 4.14629200  |
| H | 4.59654300  | 1.76651600  | 4.38022100  |
| C | 1.01540200  | -1.28656900 | 4.61686300  |
| H | 0.15972200  | -1.92108600 | 4.87635200  |
| H | 0.91657300  | -0.35810900 | 5.19504400  |
| H | 1.95563600  | -1.77019200 | 4.89515300  |
| C | 0.98515300  | -0.93680500 | 3.14744700  |
| O | -0.12773400 | -0.66698100 | 2.63660300  |
| O | 2.10322200  | -0.93668000 | 2.55468900  |
| C | -2.72741600 | -1.26442200 | -0.58927700 |
| C | -3.13704500 | -0.05618700 | -1.15480400 |
| C | -2.58328000 | 0.38168800  | -2.39386600 |
| C | -1.53801600 | -0.37722000 | -2.99643300 |
| C | -1.09420300 | -1.56060700 | -2.36573600 |

|   |             |             |             |
|---|-------------|-------------|-------------|
| C | -1.68493000 | -2.00527500 | -1.20715900 |
| H | -3.82503500 | 2.14818600  | -2.59071500 |
| C | -3.01308400 | 1.57326100  | -3.03454100 |
| C | -0.93351800 | 0.09891100  | -4.18423500 |
| H | -0.25889800 | -2.10724700 | -2.81028600 |
| H | -1.35566500 | -2.93730600 | -0.74381200 |
| C | -1.35287300 | 1.26720300  | -4.76515500 |
| C | -2.41277600 | 2.00412100  | -4.18947600 |
| H | -0.10928400 | -0.47659000 | -4.60812700 |
| H | -0.87564800 | 1.62975400  | -5.67428200 |
| H | -2.74705900 | 2.92766400  | -4.65964200 |
| C | -8.29096600 | 0.34008500  | -0.90161000 |
| C | -7.80731300 | 1.15624000  | 0.08794100  |
| C | -6.41377000 | 1.34423200  | 0.25553400  |
| C | -5.50799900 | 0.65174800  | -0.60141200 |
| C | -7.39738500 | -0.32284300 | -1.77161100 |
| H | -6.59289300 | 2.72908000  | 1.90527800  |
| H | -9.36441200 | 0.20717800  | -1.02617000 |
| H | -8.48667400 | 1.68568700  | 0.75644300  |
| C | -5.89726400 | 2.21359200  | 1.24252600  |
| C | -4.10257100 | 0.81290000  | -0.41465700 |
| H | -7.78753300 | -0.96124600 | -2.56255400 |
| C | -3.63762100 | 1.74706400  | 0.50545400  |
| C | -4.54861100 | 2.43266600  | 1.34560600  |
| H | -4.16395000 | 3.13208300  | 2.08798500  |
| P | -3.54744400 | -1.82051800 | 0.99809900  |
| P | -1.83017600 | 2.14892200  | 0.56146800  |
| C | -6.04233400 | -0.17466800 | -1.62261800 |
| H | -5.35783100 | -0.68877800 | -2.29584000 |
| C | -1.69675800 | 3.50346900  | -0.67884700 |
| C | -0.55508100 | 3.55145700  | -1.47950400 |
| C | -2.70359000 | 4.45981100  | -0.85388900 |
| C | -0.41162400 | 4.55024900  | -2.43822700 |
| H | 0.20765200  | 2.77946300  | -1.38278800 |
| C | -2.56032700 | 5.45320600  | -1.81503400 |
| H | -3.60787600 | 4.42055100  | -0.24453300 |
| C | -1.41306500 | 5.50014600  | -2.60578200 |
| H | 0.48266000  | 4.56891200  | -3.06024200 |
| H | -3.34677000 | 6.19449600  | -1.94914900 |
| H | -1.30483300 | 6.27934000  | -3.35906800 |
| C | -1.60314200 | 2.97080900  | 2.19523100  |
| C | -1.54018600 | 2.13685600  | 3.31946400  |
| C | -1.43881100 | 4.34889400  | 2.34956500  |
| C | -1.32857800 | 2.68207000  | 4.57990400  |

|    |             |             |             |
|----|-------------|-------------|-------------|
| H  | -1.62881500 | 1.05517800  | 3.20349100  |
| C  | -1.21396700 | 4.88705400  | 3.61441900  |
| H  | -1.47610300 | 5.00404500  | 1.47952600  |
| C  | -1.16166500 | 4.05739800  | 4.72911000  |
| H  | -1.28569600 | 2.02815200  | 5.44951800  |
| H  | -1.07986900 | 5.96183000  | 3.72631900  |
| H  | -0.98580400 | 4.48208900  | 5.71614000  |
| C  | -2.61434400 | -3.36739500 | 1.46673500  |
| C  | -1.78861800 | -3.26114600 | 2.59148800  |
| C  | -2.77204300 | -4.62365500 | 0.86934800  |
| C  | -1.12615200 | -4.37725400 | 3.09843200  |
| H  | -1.66580200 | -2.28848200 | 3.06676200  |
| C  | -2.12120200 | -5.74103300 | 1.38161600  |
| H  | -3.43500200 | -4.74081100 | 0.01279200  |
| C  | -1.29764900 | -5.62140900 | 2.49959800  |
| H  | -0.49177200 | -4.27818300 | 3.97933600  |
| H  | -2.26871200 | -6.71380100 | 0.91381500  |
| H  | -0.80139800 | -6.50008100 | 2.91036700  |
| Ag | -0.21560500 | 0.19161600  | 0.47992700  |
| C  | -5.10109300 | -2.57108500 | 0.29932500  |
| C  | -6.25121600 | -2.47770000 | 1.08599300  |
| C  | -5.18331700 | -3.21643300 | -0.93992100 |
| C  | -7.45418000 | -3.02980900 | 0.65594700  |
| H  | -6.20057400 | -1.95375200 | 2.04184200  |
| C  | -6.38173000 | -3.77681200 | -1.36760100 |
| H  | -4.30440300 | -3.26389700 | -1.58635800 |
| C  | -7.51941700 | -3.68592800 | -0.56873900 |
| H  | -8.34342500 | -2.94473300 | 1.27877200  |
| H  | -6.43096600 | -4.28060600 | -2.33233400 |
| H  | -8.45928100 | -4.11990000 | -0.90708900 |

**TS42-43**

|    |             |             |             |
|----|-------------|-------------|-------------|
| S  | -6.19922100 | 1.07464300  | 0.26147500  |
| O  | -5.90974300 | 0.12753800  | -0.93780800 |
| O  | -7.35349100 | 0.66671800  | 1.15758500  |
| C  | -6.75118300 | 2.66791300  | -0.62118900 |
| O  | -4.90364900 | 1.55173300  | 0.96153500  |
| Ni | -2.70851300 | 0.53011300  | 0.76956800  |
| F  | -7.03370900 | 3.59820500  | 0.27132800  |
| F  | -7.81084800 | 2.42952700  | -1.37060600 |
| F  | -5.75280500 | 3.08780100  | -1.39071000 |
| C  | -3.35684500 | -4.48226200 | -1.69233200 |
| C  | -2.82834900 | -2.14394000 | -1.76003800 |
| C  | -2.92197400 | -2.14360100 | -3.15046300 |

|   |             |             |             |
|---|-------------|-------------|-------------|
| C | -3.27718800 | -3.31494700 | -3.80848100 |
| C | -3.50067800 | -4.48163100 | -3.07544100 |
| H | -3.50371900 | -5.40425200 | -1.12953200 |
| H | -2.69384400 | -1.23628900 | -3.71138800 |
| H | -3.37473100 | -3.32464500 | -4.89282600 |
| H | -3.77945300 | -5.39965300 | -3.59077500 |
| C | -2.31012700 | -0.95477000 | -1.00689100 |
| O | -1.07803500 | -0.69853200 | -1.15249300 |
| N | -3.21016300 | 0.21366100  | -0.99498900 |
| H | -4.23321000 | -0.02319000 | -1.01002700 |
| C | -2.92960000 | 1.35636800  | -1.80949700 |
| C | -2.29656800 | 2.43004100  | -1.15765300 |
| C | -3.30394700 | 1.47329400  | -3.12444200 |
| C | -1.96783700 | 3.60920800  | -1.86497500 |
| C | -2.99362600 | 2.65399600  | -3.83632100 |
| H | -3.86004300 | 0.66678500  | -3.59976400 |
| C | -1.42162200 | 3.24275800  | 0.82084600  |
| C | -1.28962400 | 4.61995900  | -1.14455300 |
| C | -2.32906800 | 3.69365900  | -3.23043600 |
| H | -3.29355900 | 2.73608600  | -4.87885100 |
| C | -1.01101700 | 4.43452500  | 0.18608500  |
| H | -1.21861900 | 3.07748500  | 1.87706900  |
| H | -0.99752600 | 5.53638400  | -1.65700500 |
| H | -2.08763100 | 4.59940400  | -3.78555500 |
| H | -0.47590100 | 5.18123800  | 0.76843200  |
| N | -2.03870800 | 2.27590400  | 0.17462100  |
| C | -3.01795500 | -3.30284500 | -1.02871100 |
| C | -2.78589900 | -3.16529600 | 0.44512100  |
| C | -2.72422500 | -1.65909400 | 0.88494700  |
| C | -3.98186500 | -1.55243200 | 1.80874500  |
| C | -3.95074300 | -3.72940500 | 1.27649800  |
| H | -4.40708100 | -0.55471500 | 1.95899500  |
| H | -1.83549300 | -3.66679800 | 0.70701700  |
| H | -1.78166400 | -1.50144000 | 1.44030900  |
| H | -4.30297300 | -4.69998800 | 0.90398100  |
| C | -3.54685900 | -3.73491700 | 2.75551500  |
| H | -2.54881100 | -4.17237900 | 2.90438300  |
| H | -4.25415300 | -4.32754700 | 3.35075900  |
| C | -4.94511400 | -2.57174600 | 1.20128300  |
| H | -5.26410100 | -2.31937200 | 0.18069100  |
| H | -5.84011000 | -2.71333100 | 1.82166100  |
| C | -3.60540400 | -2.23542800 | 3.13459800  |
| H | -2.65868900 | -1.85710600 | 3.54269200  |
| H | -4.38515700 | -2.04061700 | 3.88441400  |



|   |             |             |             |
|---|-------------|-------------|-------------|
| C | -1.37538500 | 0.84086100  | 4.74758800  |
| H | -0.52108500 | 1.38545300  | 5.16381900  |
| H | -1.33790200 | -0.18374200 | 5.14172900  |
| H | -2.31966900 | 1.29272000  | 5.06420000  |
| C | -1.27781500 | 0.77018000  | 3.24293800  |
| O | -0.13504300 | 0.72058600  | 2.73042800  |
| O | -2.38129900 | 0.74768700  | 2.62109700  |
| C | 2.82651500  | 1.21847500  | -0.59651700 |
| C | 3.19798700  | -0.00418400 | -1.15459000 |
| C | 2.53597500  | -0.49974300 | -2.31594400 |
| C | 1.39994600  | 0.19900900  | -2.81911700 |
| C | 1.00246300  | 1.40137500  | -2.19406000 |
| C | 1.70799600  | 1.91473300  | -1.13016000 |
| H | 3.81895600  | -2.22368000 | -2.59968900 |
| C | 2.93815200  | -1.69639400 | -2.96425800 |
| C | 0.66884500  | -0.35013400 | -3.89913900 |
| H | 0.11542700  | 1.91408400  | -2.57107100 |
| H | 1.39501500  | 2.85543700  | -0.67094900 |
| C | 1.06745000  | -1.52171300 | -4.48814300 |
| C | 2.22743100  | -2.18723100 | -4.02921000 |
| H | -0.22501500 | 0.17763400  | -4.23637700 |
| H | 0.49294500  | -1.94494000 | -5.31071000 |
| H | 2.54688900  | -3.10850400 | -4.51330400 |
| C | 8.35630200  | -0.41112700 | -1.07850700 |
| C | 7.90650900  | -1.18164300 | -0.03707200 |
| C | 6.51932800  | -1.36250300 | 0.18489600  |
| C | 5.58884700  | -0.70761200 | -0.67511400 |
| C | 7.43573300  | 0.21453100  | -1.94853800 |
| H | 6.74609700  | -2.66526800 | 1.89471700  |
| H | 9.42526400  | -0.28472100 | -1.24274100 |
| H | 8.60936800  | -1.67802500 | 0.63259200  |
| C | 6.03076300  | -2.17887900 | 1.23085900  |
| C | 4.19287900  | -0.85185500 | -0.43128800 |
| H | 7.80017600  | 0.81966300  | -2.77683900 |
| C | 3.74941800  | -1.72797500 | 0.55509900  |
| C | 4.68412200  | -2.37908800 | 1.39487600  |
| H | 4.32064300  | -3.03200700 | 2.18917000  |
| P | 3.78910200  | 1.82125500  | 0.89064800  |
| P | 1.92792000  | -2.03762400 | 0.71289900  |
| C | 6.08650300  | 0.07640600  | -1.74717300 |
| H | 5.37633400  | 0.56934600  | -2.41070000 |
| C | 1.68507400  | -3.44301600 | -0.45725700 |
| C | 0.51500800  | -3.46889100 | -1.21823100 |
| C | 2.63854600  | -4.45570000 | -0.61981800 |

|    |             |             |             |
|----|-------------|-------------|-------------|
| C  | 0.29223200  | -4.50308900 | -2.12491000 |
| H  | -0.19793500 | -2.64486700 | -1.14215100 |
| C  | 2.41390900  | -5.48390300 | -1.52720600 |
| H  | 3.56519100  | -4.43438800 | -0.04396000 |
| C  | 1.23912000  | -5.50959100 | -2.27796000 |
| H  | -0.62202600 | -4.50452100 | -2.71921100 |
| H  | 3.15999400  | -6.26755400 | -1.65218400 |
| H  | 1.06946600  | -6.31535500 | -2.99107600 |
| C  | 1.70711800  | -2.78203200 | 2.38564800  |
| C  | 1.64590400  | -1.89516800 | 3.46899300  |
| C  | 1.51073900  | -4.14689300 | 2.60767400  |
| C  | 1.41211200  | -2.37187600 | 4.75325100  |
| H  | 1.75471100  | -0.82188100 | 3.30161900  |
| C  | 1.26498400  | -4.61855000 | 3.89499700  |
| H  | 1.54166800  | -4.84497800 | 1.77154500  |
| C  | 1.21779900  | -3.73464800 | 4.96772400  |
| H  | 1.37154600  | -1.67358000 | 5.58810300  |
| H  | 1.10794600  | -5.68379600 | 4.05760100  |
| H  | 1.02292800  | -4.10675200 | 5.97224900  |
| C  | 2.79316900  | 3.27950400  | 1.47625500  |
| C  | 1.86451200  | 3.00251300  | 2.48622800  |
| C  | 2.97924300  | 4.60943400  | 1.08446000  |
| C  | 1.13017300  | 4.02357800  | 3.08166700  |
| H  | 1.70572700  | 1.97651800  | 2.81887100  |
| C  | 2.25968400  | 5.63418700  | 1.69424900  |
| H  | 3.71291800  | 4.85382100  | 0.31681200  |
| C  | 1.33580000  | 5.34587900  | 2.69633800  |
| H  | 0.41238100  | 3.78185600  | 3.86649500  |
| H  | 2.43264400  | 6.66661400  | 1.39251800  |
| H  | 0.78776500  | 6.15153400  | 3.18376100  |
| Ag | 0.32460000  | -0.01104100 | 0.59430700  |
| C  | 5.21281700  | 2.65082000  | 0.03222800  |
| C  | 6.46278200  | 2.56000700  | 0.64879700  |
| C  | 5.10482400  | 3.33805400  | -1.18233100 |
| C  | 7.58241500  | 3.15232000  | 0.07225300  |
| H  | 6.56057100  | 1.99351000  | 1.57636800  |
| C  | 6.22080000  | 3.93834500  | -1.75516000 |
| H  | 4.13834100  | 3.39428000  | -1.68787900 |
| C  | 7.46148200  | 3.84647300  | -1.12666100 |
| H  | 8.55349900  | 3.06286800  | 0.55710300  |
| H  | 6.12493100  | 4.47371900  | -2.69892200 |
| H  | 8.33620600  | 4.31194800  | -1.57880100 |

IM43

|    |             |             |             |
|----|-------------|-------------|-------------|
| S  | 5.53932300  | -1.01993900 | 1.74622800  |
| O  | 6.36485400  | -0.47396400 | 0.58681600  |
| O  | 5.85806700  | -0.57533700 | 3.16073100  |
| C  | 5.84336900  | -2.90173000 | 1.71522200  |
| O  | 3.97245400  | -0.96207900 | 1.51117600  |
| Ni | 3.09136700  | -1.59863900 | -0.04151300 |
| F  | 5.11752300  | -3.46577200 | 2.66071200  |
| F  | 7.12238200  | -3.13743400 | 1.92777700  |
| F  | 5.49108000  | -3.38129900 | 0.53389800  |
| C  | 4.19128900  | 4.61779700  | -2.13874800 |
| C  | 2.74523600  | 2.70246400  | -1.96728800 |
| C  | 2.89472800  | 2.40132500  | -3.32023600 |
| C  | 3.71425300  | 3.22209800  | -4.08037400 |
| C  | 4.35790500  | 4.31642700  | -3.48855800 |
| H  | 4.69420500  | 5.47772000  | -1.69616700 |
| H  | 2.38726500  | 1.53689400  | -3.74844400 |
| H  | 3.86883600  | 3.01085400  | -5.13767200 |
| H  | 5.00113500  | 4.94752100  | -4.10086900 |
| C  | 1.95492300  | 1.98514400  | -0.97212500 |
| O  | 1.24438500  | 1.00724700  | -1.20562700 |
| N  | 4.07686000  | -0.56939300 | -1.21663100 |
| H  | 5.00919700  | -0.25081800 | -0.95185600 |
| C  | 3.82748000  | -0.82110500 | -2.51377100 |
| C  | 2.70970900  | -1.68358300 | -2.73303000 |
| C  | 4.48747700  | -0.34968100 | -3.65473200 |
| C  | 2.23843900  | -2.02648500 | -4.02164800 |
| C  | 4.00474900  | -0.67084700 | -4.93311200 |
| H  | 5.36391000  | 0.28766400  | -3.54317900 |
| C  | 1.19702800  | -3.08859900 | -1.66082800 |
| C  | 1.17432400  | -2.95838000 | -4.06658000 |
| C  | 2.89630400  | -1.47225000 | -5.14324800 |
| H  | 4.53610200  | -0.26967500 | -5.79689100 |
| C  | 0.66849700  | -3.49120500 | -2.90261000 |
| H  | 0.82798900  | -3.48386700 | -0.71456600 |
| H  | 0.77907900  | -3.26656000 | -5.03523600 |
| H  | 2.56010600  | -1.72533900 | -6.14735200 |
| H  | -0.13880200 | -4.22219100 | -2.91346100 |
| N  | 2.18138600  | -2.20708900 | -1.59318500 |
| C  | 3.36740500  | 3.80262100  | -1.37017300 |
| C  | 3.00324600  | 3.92704800  | 0.08443600  |
| C  | 2.09450100  | 2.69552100  | 0.35645000  |
| C  | 2.86902100  | 1.90825400  | 1.43315700  |
| C  | 4.16418000  | 3.71770300  | 1.07758700  |
| H  | 2.58137300  | 0.85372700  | 1.50433900  |

|   |             |             |             |
|---|-------------|-------------|-------------|
| H | 2.48885000  | 4.88392700  | 0.26864400  |
| H | 1.08892900  | 2.95987700  | 0.72027300  |
| H | 5.05673500  | 4.30922400  | 0.83529200  |
| C | 3.60807000  | 3.95154200  | 2.49190400  |
| H | 3.03159400  | 4.88560100  | 2.55780900  |
| H | 4.42720300  | 4.02338800  | 3.21897000  |
| C | 4.32784200  | 2.19431100  | 1.05963500  |
| H | 4.63260800  | 1.78170600  | 0.08907500  |
| H | 5.03096800  | 1.83299100  | 1.82350200  |
| C | 2.74055500  | 2.68830200  | 2.74608800  |
| H | 1.69523100  | 2.92343500  | 2.99395700  |
| H | 3.14868300  | 2.08459200  | 3.56763500  |
| C | 1.88394200  | -2.89489300 | 3.48239500  |
| H | 1.06707600  | -2.77010200 | 4.20077500  |
| H | 2.77751800  | -2.39295000 | 3.88163600  |
| H | 2.13724300  | -3.95221200 | 3.35212500  |
| C | 1.56970900  | -2.23721300 | 2.16384300  |
| O | 0.80412200  | -1.24592900 | 2.17280100  |
| O | 2.12927500  | -2.74123200 | 1.13714000  |
| C | -2.84713500 | -1.01613000 | -0.74195800 |
| C | -3.43974000 | 0.23710500  | -0.87435800 |
| C | -3.10643800 | 1.07639400  | -1.97734800 |
| C | -2.04515700 | 0.69439600  | -2.85199900 |
| C | -1.37902400 | -0.52960900 | -2.62221300 |
| C | -1.79749600 | -1.37773900 | -1.62383000 |
| H | -4.58432800 | 2.60456000  | -1.55378900 |
| C | -3.77833100 | 2.30264700  | -2.22203000 |
| C | -1.68103900 | 1.55415500  | -3.91756300 |
| H | -0.52945100 | -0.80216100 | -3.25264000 |
| H | -1.30548000 | -2.34190000 | -1.50125000 |
| C | -2.36025400 | 2.72541400  | -4.13514200 |
| C | -3.42567700 | 3.09608600  | -3.28323600 |
| H | -0.85678200 | 1.25486700  | -4.56583100 |
| H | -2.08169400 | 3.37322300  | -4.96478000 |
| H | -3.95649100 | 4.03026000  | -3.46014300 |
| C | -8.49100500 | 0.24197300  | 0.36279200  |
| C | -7.83713000 | 0.77354900  | 1.44431000  |
| C | -6.43487000 | 0.97318100  | 1.41741000  |
| C | -5.70287900 | 0.59576100  | 0.25304700  |
| C | -7.77019000 | -0.10926900 | -0.80065800 |
| H | -6.30805200 | 1.82049900  | 3.40119500  |
| H | -9.56944500 | 0.09572000  | 0.39411200  |
| H | -8.38607200 | 1.05869000  | 2.34219400  |
| C | -5.74332400 | 1.54345900  | 2.51044900  |

|    |             |             |             |
|----|-------------|-------------|-------------|
| C  | -4.28922700 | 0.76371000  | 0.23473100  |
| H  | -8.29624200 | -0.52758100 | -1.65731800 |
| C  | -3.65333700 | 1.38856000  | 1.30218200  |
| C  | -4.39157900 | 1.76646800  | 2.44866400  |
| H  | -3.87406700 | 2.22803800  | 3.28991400  |
| P  | -3.37910100 | -2.10791500 | 0.68159100  |
| P  | -1.84005400 | 1.76194500  | 1.15035900  |
| C  | -6.41128400 | 0.06299300  | -0.85347100 |
| H  | -5.85571100 | -0.21066900 | -1.74944600 |
| C  | -1.89345700 | 3.38441300  | 0.25957700  |
| C  | -1.01352200 | 3.60709700  | -0.80070100 |
| C  | -2.80299000 | 4.38962600  | 0.60958500  |
| C  | -0.99648900 | 4.82968600  | -1.46547200 |
| H  | -0.36187200 | 2.80191700  | -1.13314200 |
| C  | -2.79920400 | 5.60434600  | -0.06619800 |
| H  | -3.52443800 | 4.21878800  | 1.41010200  |
| C  | -1.88590700 | 5.83173300  | -1.09430700 |
| H  | -0.29376500 | 4.98390600  | -2.28399400 |
| H  | -3.50992100 | 6.38045900  | 0.21359100  |
| H  | -1.87990700 | 6.78851500  | -1.61428000 |
| C  | -1.33012100 | 2.19586000  | 2.87038300  |
| C  | -1.07769200 | 1.11678300  | 3.72755100  |
| C  | -1.11908800 | 3.49752400  | 3.33121000  |
| C  | -0.63863100 | 1.33889700  | 5.02671100  |
| H  | -1.20515500 | 0.09398400  | 3.36754500  |
| C  | -0.67258100 | 3.71520000  | 4.63280400  |
| H  | -1.29226200 | 4.34762000  | 2.67227400  |
| C  | -0.43431100 | 2.63961500  | 5.48110800  |
| H  | -0.43769400 | 0.49112800  | 5.67907000  |
| H  | -0.50480900 | 4.73316900  | 4.98101500  |
| H  | -0.07649400 | 2.81292700  | 6.49453300  |
| C  | -2.30438400 | -3.60789100 | 0.44067800  |
| C  | -1.22543900 | -3.74081200 | 1.32119700  |
| C  | -2.51227200 | -4.60255100 | -0.52199100 |
| C  | -0.36075300 | -4.82994500 | 1.22854200  |
| H  | -1.05555200 | -2.97438000 | 2.08059700  |
| C  | -1.65171200 | -5.69124600 | -0.61317300 |
| H  | -3.36289700 | -4.53896500 | -1.19930100 |
| C  | -0.57169600 | -5.80510600 | 0.25993700  |
| H  | 0.48469300  | -4.91208900 | 1.90850500  |
| H  | -1.82964400 | -6.46000100 | -1.36444800 |
| H  | 0.10141100  | -6.65801800 | 0.19004400  |
| Ag | -0.08135100 | -0.04718600 | 0.46817500  |
| C  | -5.00873800 | -2.71461400 | 0.01952400  |

|   |             |             |             |
|---|-------------|-------------|-------------|
| C | -6.02385300 | -2.94905400 | 0.94994100  |
| C | -5.27101500 | -2.94505200 | -1.33606500 |
| C | -7.26728600 | -3.42236100 | 0.54113800  |
| H | -5.83815400 | -2.74122100 | 2.00482900  |
| C | -6.50907800 | -3.42617600 | -1.74577900 |
| H | -4.50324100 | -2.73117200 | -2.08199000 |
| C | -7.50887500 | -3.66826900 | -0.80631500 |
| H | -8.05022400 | -3.59392500 | 1.27836000  |
| H | -6.69742000 | -3.60822900 | -2.80323500 |
| H | -8.48014400 | -4.04127400 | -1.12836400 |

**TS26-27**

|    |             |             |             |
|----|-------------|-------------|-------------|
| S  | 3.25819300  | -0.72852200 | -0.95829300 |
| O  | 1.73971800  | -0.21358900 | -1.15006900 |
| O  | 4.26516200  | 0.26938300  | -1.49110000 |
| C  | 3.26383100  | -2.17451500 | -2.21077700 |
| O  | 3.43474200  | -1.36968500 | 0.41193900  |
| Ni | 0.76212300  | -0.19438300 | 0.45227700  |
| F  | 4.50493100  | -2.54787100 | -2.42148800 |
| F  | 2.70629400  | -1.77208900 | -3.33573800 |
| F  | 2.56860100  | -3.17659300 | -1.70220000 |
| C  | 2.95986600  | 1.88934100  | 0.82538200  |
| C  | 1.79102800  | 0.90396700  | 2.69383000  |
| C  | 2.86396300  | 1.17148200  | 3.53779800  |
| C  | 3.98525400  | 1.80435800  | 3.01326600  |
| C  | 4.03425800  | 2.15984700  | 1.66357800  |
| H  | 2.99676000  | 2.17669500  | -0.22558200 |
| H  | 2.81714000  | 0.86375600  | 4.58081700  |
| H  | 4.83523100  | 2.01924000  | 3.65844800  |
| H  | 4.92366900  | 2.64172000  | 1.26219100  |
| C  | 0.64342800  | 0.13103500  | 3.18551400  |
| O  | 0.46416100  | -0.27360100 | 4.30278500  |
| N  | -0.27045300 | -0.21827600 | 2.07427200  |
| H  | -0.96296700 | 0.52782500  | 1.83217100  |
| C  | -0.99838400 | -1.46995300 | 2.18467000  |
| C  | -0.96612600 | -2.24195100 | 1.00958500  |
| C  | -1.75409700 | -1.87181300 | 3.25621800  |
| C  | -1.71287000 | -3.43576100 | 0.90991100  |
| C  | -2.46941600 | -3.08834300 | 3.17749000  |
| H  | -1.79905300 | -1.26377900 | 4.15425700  |
| C  | -0.26583900 | -2.38145800 | -1.19913500 |
| C  | -1.69897100 | -4.10033700 | -0.33450200 |
| C  | -2.45567900 | -3.85243500 | 2.03714700  |
| H  | -3.05699100 | -3.40509900 | 4.03610700  |

|    |             |             |             |
|----|-------------|-------------|-------------|
| C  | -0.99542000 | -3.56788500 | -1.38703700 |
| H  | 0.30966800  | -1.92628100 | -2.00275800 |
| H  | -2.26870800 | -5.02137400 | -0.45224100 |
| H  | -3.03259600 | -4.77421600 | 1.97803100  |
| H  | -0.99082200 | -4.04259000 | -2.36396300 |
| N  | -0.23001600 | -1.75992600 | -0.03478000 |
| C  | 1.81290100  | 1.25630500  | 1.32684700  |
| S  | -3.09761800 | 0.06812800  | -0.38724300 |
| O  | -2.36279600 | 0.92838800  | 0.66784900  |
| O  | -2.31034800 | 0.06526600  | -1.74538700 |
| C  | -4.61500500 | 1.13472900  | -0.80007600 |
| O  | -3.61651500 | -1.29221600 | 0.04623100  |
| H  | 0.78270000  | 1.89998300  | 0.88759900  |
| F  | -4.18464500 | 2.30138200  | -1.23670400 |
| F  | -5.33365800 | 1.29393600  | 0.29058000  |
| F  | -5.32456600 | 0.53342700  | -1.73052800 |
| C  | 0.96235100  | 5.15579100  | 0.09862400  |
| H  | 1.18942200  | 5.70714700  | -0.81748400 |
| H  | 1.86387300  | 5.09480200  | 0.72391500  |
| H  | 0.20367800  | 5.68367600  | 0.68695000  |
| C  | 0.49933100  | 3.75682500  | -0.19529700 |
| O  | 0.07679300  | 3.07105100  | 0.79798300  |
| O  | 0.58698700  | 3.31702300  | -1.36719700 |
| Ag | -0.64209900 | 1.50837500  | -1.54612400 |

**TSW-44**

|    |             |             |             |
|----|-------------|-------------|-------------|
| S  | -1.51755800 | 2.64007900  | 0.72025200  |
| O  | -1.55834800 | 1.58197800  | -0.46670400 |
| O  | -2.74871300 | 3.44274400  | 1.03898300  |
| C  | -0.09788800 | 3.91111700  | 0.26028900  |
| O  | -0.90831700 | 1.69757600  | 1.85136500  |
| S  | 2.29325100  | 1.00152400  | -1.19813300 |
| O  | 2.91888700  | 2.16038900  | -1.93440200 |
| C  | 3.67964700  | -0.27569400 | -0.92714300 |
| O  | 1.68668000  | 1.18648200  | 0.19639400  |
| Ni | -0.65281900 | 0.26613200  | 0.59077400  |
| C  | -5.25330000 | -1.67223100 | -1.63586600 |
| C  | -2.89487800 | -1.45558000 | -1.15904600 |
| C  | -3.16954200 | -1.55703200 | 0.20790500  |
| C  | -4.47705800 | -1.71239700 | 0.64942200  |
| C  | -5.51954700 | -1.76369200 | -0.27125900 |
| H  | -6.06895800 | -1.71281300 | -2.35516600 |
| H  | -2.35877200 | -1.51552500 | 0.93394100  |
| H  | -4.68298500 | -1.78821000 | 1.71530400  |

|   |             |             |             |
|---|-------------|-------------|-------------|
| H | -6.54516300 | -1.87500800 | 0.07660200  |
| C | -1.52480700 | -1.30627000 | -1.70373300 |
| O | -1.27028500 | -1.42783300 | -2.88059200 |
| N | -0.44625600 | -1.02613300 | -0.77761300 |
| C | 0.20309600  | -2.18222700 | -0.27462000 |
| C | 0.58150200  | -2.09546600 | 1.08123300  |
| C | 0.54464100  | -3.31039600 | -0.98840200 |
| C | 1.31632100  | -3.11563700 | 1.72298100  |
| C | 1.26844100  | -4.34372700 | -0.35248600 |
| H | 0.27990800  | -3.38550300 | -2.04145500 |
| C | 0.53606000  | -0.76670500 | 2.99073200  |
| C | 1.64695300  | -2.89812900 | 3.08005700  |
| C | 1.65542800  | -4.26055300 | 0.96505100  |
| H | 1.53512300  | -5.22383100 | -0.93449800 |
| C | 1.26223900  | -1.73668000 | 3.70777600  |
| H | 0.22252100  | 0.17602800  | 3.43645800  |
| H | 2.21149300  | -3.65940600 | 3.61793800  |
| H | 2.21829300  | -5.06492800 | 1.43584800  |
| H | 1.51242500  | -1.54828300 | 4.74818400  |
| N | 0.20267900  | -0.95713800 | 1.72900600  |
| C | -3.94727200 | -1.52608200 | -2.07845800 |
| H | -3.71281300 | -1.45454100 | -3.13848900 |
| F | 4.57763000  | 0.24157600  | -0.11653300 |
| F | 4.22173100  | -0.57681000 | -2.08391600 |
| F | 3.14479800  | -1.35519400 | -0.37902500 |
| F | 0.48071000  | 3.51511600  | -0.83711600 |
| F | -0.68473500 | 5.07017400  | 0.09086300  |
| F | 0.73040700  | 3.95030900  | 1.26955900  |
| O | 1.30148800  | 0.15672500  | -2.13821100 |
| H | 0.49558500  | -0.36916200 | -1.52575100 |

#### IM44

|    |             |             |             |
|----|-------------|-------------|-------------|
| S  | -2.55896000 | 1.16702500  | 0.98265900  |
| O  | -2.05164100 | 0.28389400  | -0.22922000 |
| O  | -4.01254400 | 1.13910800  | 1.36938200  |
| C  | -2.11898200 | 3.01406400  | 0.50882800  |
| O  | -1.48018800 | 0.72544800  | 2.06781500  |
| S  | 1.31508800  | 1.85655700  | -1.37485800 |
| O  | 0.97289600  | 3.06448900  | -2.20382700 |
| C  | 3.22329600  | 1.71298800  | -1.35937700 |
| O  | 0.88309400  | 1.67604800  | 0.07208400  |
| Ni | -0.59513200 | -0.44937000 | 0.82442300  |
| C  | -4.21212000 | -2.34869600 | -2.13411600 |
| C  | -1.98581400 | -2.41979000 | -1.21469600 |



|   |             |             |             |
|---|-------------|-------------|-------------|
| C | -2.52043000 | -2.66054700 | 0.05359800  |
| C | -3.89624600 | -2.73024700 | 0.22887700  |
| C | -4.74230800 | -2.55494700 | -0.86308900 |
| H | -4.87621100 | -2.22300300 | -2.98737400 |
| H | -1.85220000 | -2.79553900 | 0.90510500  |
| H | -4.31142400 | -2.91388300 | 1.21815400  |
| H | -5.82152500 | -2.58736100 | -0.72352400 |
| C | -0.52119200 | -2.30380800 | -1.43463300 |
| O | 0.02922400  | -2.78248500 | -2.41439400 |
| N | 0.17698400  | -1.58601300 | -0.45745700 |
| C | 1.49818200  | -1.92419300 | -0.13197500 |
| C | 1.85555200  | -1.52466600 | 1.17954000  |
| C | 2.45064800  | -2.57850800 | -0.89377600 |
| C | 3.13057400  | -1.77880100 | 1.73147100  |
| C | 3.72619400  | -2.83874600 | -0.34454700 |
| H | 2.20617400  | -2.88316400 | -1.90573300 |
| C | 1.11676700  | -0.45219800 | 3.11413200  |
| C | 3.35141600  | -1.33099600 | 3.05296800  |
| C | 4.07684600  | -2.45743400 | 0.92926000  |
| H | 4.45430200  | -3.35749900 | -0.96579100 |
| C | 2.35544500  | -0.67724100 | 3.74044300  |
| H | 0.30520600  | 0.08252600  | 3.60469200  |
| H | 4.32161800  | -1.50766300 | 3.51721200  |
| H | 5.06783400  | -2.66456200 | 1.32998400  |
| H | 2.50848900  | -0.32150000 | 4.75565700  |
| N | 0.88603000  | -0.87428800 | 1.88477300  |
| C | -2.83573500 | -2.29847500 | -2.31351100 |
| H | -2.39967100 | -2.14099400 | -3.29854500 |
| F | 3.68828600  | 2.75129800  | -0.70214800 |
| F | 3.65576400  | 1.70955700  | -2.59568600 |
| F | 3.54608100  | 0.59790000  | -0.74392400 |
| F | -1.60065200 | 3.00857200  | -0.68933800 |
| F | -3.24158600 | 3.68953700  | 0.53038500  |
| F | -1.27988600 | 3.47696300  | 1.39801200  |
| O | 0.94780900  | 0.48615000  | -2.22884000 |
| H | 0.58815400  | -0.19241600 | -1.58578200 |

#### IM45

|    |             |             |             |
|----|-------------|-------------|-------------|
| S  | -2.15673800 | -1.48066500 | -0.38546500 |
| O  | -1.75194000 | -0.04095900 | 0.11896800  |
| O  | -3.40155100 | -1.69013800 | -1.20141100 |
| C  | -2.34356700 | -2.52893800 | 1.20716700  |
| O  | -0.75392000 | -1.94414600 | -0.97319300 |
| Ni | 0.12809400  | -0.33803700 | -0.35410400 |

|   |             |             |             |
|---|-------------|-------------|-------------|
| C | -3.17484200 | 3.67437100  | 0.12897700  |
| C | -0.97646800 | 2.68772300  | 0.01217500  |
| C | -1.16644300 | 2.43797500  | -1.34846000 |
| C | -2.35839700 | 2.79748200  | -1.96518700 |
| C | -3.36820400 | 3.40407800  | -1.22393900 |
| H | -3.96131400 | 4.15892200  | 0.70530400  |
| H | -0.36933700 | 1.96605800  | -1.92374900 |
| H | -2.50117800 | 2.60475500  | -3.02722400 |
| H | -4.30677500 | 3.67577900  | -1.70471500 |
| C | 0.30212700  | 2.36700000  | 0.70395100  |
| O | 0.75552600  | 3.12347200  | 1.55413400  |
| N | 0.94800900  | 1.21541200  | 0.29096200  |
| C | 2.31177400  | 1.04376600  | 0.48485800  |
| C | 2.80662900  | -0.14011200 | -0.11906700 |
| C | 3.24080900  | 1.86949000  | 1.10665500  |
| C | 4.17768200  | -0.48567000 | -0.14122600 |
| C | 4.60939300  | 1.52678000  | 1.09185800  |
| H | 2.90352400  | 2.77296600  | 1.60093600  |
| C | 2.19963700  | -2.06223500 | -1.30018200 |
| C | 4.51732800  | -1.68882200 | -0.79684700 |
| C | 5.09129900  | 0.38799200  | 0.48857100  |
| H | 5.30660600  | 2.20241500  | 1.58514700  |
| C | 3.54177000  | -2.46895400 | -1.37491400 |
| H | 1.38727100  | -2.65009700 | -1.72343800 |
| H | 5.56367400  | -1.99142000 | -0.83676000 |
| H | 6.15260500  | 0.14554200  | 0.49303900  |
| H | 3.78719600  | -3.39726900 | -1.88361800 |
| N | 1.86247800  | -0.93647000 | -0.69349600 |
| C | -1.97672100 | 3.33251000  | 0.74038000  |
| H | -1.79669200 | 3.55251700  | 1.79115500  |
| F | -1.27470300 | -2.34361300 | 1.94640200  |
| F | -3.42211100 | -2.13049300 | 1.83682900  |
| F | -2.44824900 | -3.78695200 | 0.84648100  |

**IM46**

|   |             |             |             |
|---|-------------|-------------|-------------|
| S | -1.27239500 | -2.13037000 | 0.50348100  |
| O | -0.34577200 | -1.90329800 | 1.69149000  |
| O | -2.76749800 | -2.27836300 | 0.67483900  |
| C | -0.69055400 | -3.76461100 | -0.29580000 |
| O | -0.85197500 | -1.13787700 | -0.70334000 |
| S | -2.73232900 | 1.77237400  | 0.04081700  |
| O | -1.75595700 | 0.81307100  | 0.90063800  |
| O | -3.18769600 | 2.94074100  | 0.89733900  |
| C | -4.26008600 | 0.65842600  | -0.22755800 |

|    |             |             |             |
|----|-------------|-------------|-------------|
| O  | -2.12425800 | 2.01821800  | -1.33997800 |
| Ni | -0.21926900 | 0.48424800  | -0.09120700 |
| F  | -5.19579700 | 1.41509300  | -0.76795800 |
| F  | -4.65244100 | 0.20676900  | 0.93677700  |
| F  | -3.93137800 | -0.30995500 | -1.04116300 |
| F  | 0.58423500  | -3.65919400 | -0.61833200 |
| F  | -0.85088400 | -4.73182800 | 0.58384900  |
| F  | -1.41468500 | -3.99872100 | -1.36744400 |
| C  | 4.53029000  | -2.76767000 | 0.87587600  |
| C  | 2.78044100  | -1.39368400 | -0.06045100 |
| C  | 2.54535500  | -0.83125400 | 1.19744300  |
| C  | 3.30301500  | -1.23728200 | 2.28697900  |
| C  | 4.29974500  | -2.19518200 | 2.12534300  |
| H  | 5.30140100  | -3.52564500 | 0.75408700  |
| H  | 1.73364300  | -0.12088700 | 1.34640600  |
| H  | 3.10181900  | -0.81658800 | 3.26958400  |
| H  | 4.89308000  | -2.50802700 | 2.98285800  |
| C  | 2.01789500  | -1.04479700 | -1.26886900 |
| O  | 1.95905400  | -1.70716800 | -2.27199700 |
| N  | 1.32552900  | 0.26272800  | -1.27874900 |
| H  | 0.84124000  | 0.27469700  | -2.18569400 |
| C  | 2.19081800  | 1.41835200  | -1.14028100 |
| C  | 1.75336900  | 2.38813300  | -0.22143700 |
| C  | 3.35701000  | 1.59859100  | -1.84013900 |
| C  | 2.50847400  | 3.56237500  | -0.00760600 |
| C  | 4.11759100  | 2.77062200  | -1.63381600 |
| H  | 3.69053800  | 0.84296700  | -2.55088100 |
| C  | 0.14873300  | 3.00413700  | 1.33799000  |
| C  | 2.00558600  | 4.48165800  | 0.94272400  |
| C  | 3.70552900  | 3.73191300  | -0.74205600 |
| H  | 5.03991700  | 2.90733700  | -2.19331500 |
| C  | 0.83965600  | 4.20268000  | 1.60956200  |
| H  | -0.78547100 | 2.75191700  | 1.83774600  |
| H  | 2.55383000  | 5.40311700  | 1.13617300  |
| H  | 4.29565600  | 4.63374900  | -0.58553600 |
| H  | 0.42776100  | 4.88980700  | 2.34305600  |
| N  | 0.59348200  | 2.13164600  | 0.45099300  |
| C  | 3.76638000  | -2.37678200 | -0.21187000 |
| H  | 3.91453100  | -2.81988500 | -1.19485900 |

**TS46-47**

|   |             |             |             |
|---|-------------|-------------|-------------|
| S | 0.66925600  | -2.20855000 | -0.68177100 |
| O | -0.28262800 | -1.76175900 | -1.78729500 |
| O | 2.08652300  | -2.63995200 | -0.98495800 |

|    |             |             |             |
|----|-------------|-------------|-------------|
| C  | -0.14125500 | -3.74135100 | 0.11123200  |
| O  | 0.52315100  | -1.22020000 | 0.58502100  |
| S  | 3.13231200  | 1.12235700  | 0.10455400  |
| O  | 1.95553600  | 0.53602000  | -0.83328800 |
| O  | 3.91561400  | 2.17339000  | -0.66357300 |
| C  | 4.29416000  | -0.38062600 | 0.30255600  |
| O  | 2.58112600  | 1.42766100  | 1.49498800  |
| Ni | 0.34081500  | 0.56152100  | 0.08623500  |
| F  | 5.36419800  | 0.04370700  | 0.94844800  |
| F  | 4.62381900  | -0.81517600 | -0.88830400 |
| F  | 3.67909400  | -1.29918400 | 1.00104700  |
| F  | -1.37882300 | -3.44137400 | 0.46562500  |
| F  | -0.15785800 | -4.71347500 | -0.77793700 |
| F  | 0.55633600  | -4.10142500 | 1.16493200  |
| C  | -4.87155900 | -2.44575100 | -0.20232200 |
| C  | -3.04610300 | -0.95678300 | 0.28994100  |
| C  | -3.02459400 | -0.51688600 | -1.04015800 |
| C  | -3.92747400 | -1.04816600 | -1.94673300 |
| C  | -4.84992900 | -2.00356800 | -1.52584500 |
| H  | -5.59175000 | -3.19794800 | 0.11142300  |
| H  | -2.26966500 | 0.19775600  | -1.36321200 |
| H  | -3.90226900 | -0.73165400 | -2.98643200 |
| H  | -5.55751300 | -2.41847200 | -2.24173600 |
| C  | -2.09125800 | -0.44523900 | 1.23645700  |
| O  | -1.79887200 | -0.95257700 | 2.35346400  |
| N  | -1.30644800 | 0.70352500  | 1.12151700  |
| H  | -1.07141600 | 0.09170100  | 2.33065500  |
| C  | -1.92737000 | 1.95908000  | 0.87790600  |
| C  | -1.17962800 | 2.84866200  | 0.08043900  |
| C  | -3.13934400 | 2.36274400  | 1.39082000  |
| C  | -1.64930600 | 4.15334800  | -0.18828800 |
| C  | -3.61991900 | 3.66193000  | 1.12024500  |
| H  | -3.72412200 | 1.68554600  | 2.01295700  |
| C  | 0.73071500  | 3.15156300  | -1.20188300 |
| C  | -0.83477900 | 4.96867100  | -1.00773800 |
| C  | -2.89489200 | 4.54420700  | 0.35523800  |
| H  | -4.57894000 | 3.96498400  | 1.53462400  |
| C  | 0.34177300  | 4.47122900  | -1.50807500 |
| H  | 1.65796900  | 2.72598000  | -1.58315900 |
| H  | -1.15470400 | 5.98499500  | -1.23579500 |
| H  | -3.26932000 | 5.54674700  | 0.15391300  |
| H  | 0.98856700  | 5.07326400  | -2.13998300 |
| N  | -0.00717400 | 2.37204200  | -0.43039000 |
| C  | -3.96544000 | -1.93048100 | 0.70766800  |

|   |             |             |            |
|---|-------------|-------------|------------|
| H | -3.94670200 | -2.26916400 | 1.74183400 |
|---|-------------|-------------|------------|

**IM47**

|    |             |             |             |
|----|-------------|-------------|-------------|
| S  | 1.79843900  | -2.12284200 | -0.81243700 |
| O  | 1.31560200  | -1.72182100 | -2.19428700 |
| O  | 3.25836800  | -2.19021900 | -0.43384200 |
| C  | 1.12352800  | -3.89713400 | -0.53476200 |
| O  | 0.89540400  | -1.35998800 | 0.32242600  |
| S  | 2.68428800  | 1.71586600  | 0.49268100  |
| O  | 2.08637200  | 0.77106300  | -0.67683400 |
| O  | 3.29593600  | 2.96845500  | -0.10743800 |
| C  | 4.13278200  | 0.66167800  | 1.15299700  |
| O  | 1.67684300  | 1.81336400  | 1.63641000  |
| Ni | 0.32042100  | 0.33894500  | -0.26143700 |
| F  | 4.77106900  | 1.39423300  | 2.04573500  |
| F  | 4.92795500  | 0.36430900  | 0.15533900  |
| F  | 3.63971600  | -0.41196500 | 1.71575900  |
| F  | -0.10751700 | -3.95245000 | -1.00348200 |
| F  | 1.89487000  | -4.74504300 | -1.17538700 |
| F  | 1.12571900  | -4.16015800 | 0.75703100  |
| C  | -5.60851600 | -2.26573300 | 1.34418100  |
| C  | -3.63326000 | -1.23238000 | 0.42737300  |
| C  | -4.39188900 | -0.70430900 | -0.62127200 |
| C  | -5.75399600 | -0.96020600 | -0.68211700 |
| C  | -6.36470100 | -1.72987500 | 0.30627900  |
| H  | -6.08369200 | -2.87627000 | 2.10914600  |
| H  | -3.90835400 | -0.10797300 | -1.39366200 |
| H  | -6.34242500 | -0.56183100 | -1.50596500 |
| H  | -7.43518100 | -1.92117600 | 0.25983800  |
| C  | -2.17068200 | -1.02866700 | 0.47536700  |
| O  | -1.51791700 | -2.13114800 | 0.70220300  |
| N  | -1.53991100 | 0.10448800  | 0.27939000  |
| H  | -0.52336800 | -1.95605300 | 0.68068500  |
| C  | -2.17556900 | 1.36645400  | 0.32916800  |
| C  | -1.47730000 | 2.37661500  | -0.37055500 |
| C  | -3.31552800 | 1.72225600  | 1.02209400  |
| C  | -1.98959800 | 3.68640200  | -0.49436300 |
| C  | -3.81393400 | 3.03907900  | 0.93831100  |
| H  | -3.84413200 | 0.99168800  | 1.62854600  |
| C  | 0.41079300  | 2.88843400  | -1.63055500 |
| C  | -1.23852200 | 4.59669500  | -1.27368500 |
| C  | -3.19107100 | 4.00050400  | 0.17984400  |
| H  | -4.71840100 | 3.28683700  | 1.48991300  |
| C  | -0.06262000 | 4.19534000  | -1.85495900 |

|   |             |             |             |
|---|-------------|-------------|-------------|
| H | 1.36914200  | 2.54497000  | -2.01336500 |
| H | -1.60454900 | 5.61545500  | -1.39767800 |
| H | -3.59418400 | 5.00948900  | 0.10926800  |
| H | 0.53521900  | 4.87330900  | -2.45702700 |
| N | -0.27509200 | 2.02329400  | -0.90455700 |
| C | -4.23971400 | -2.03280600 | 1.39784700  |
| H | -3.63283000 | -2.46382400 | 2.19161400  |

**TS19-21**

|    |             |             |             |
|----|-------------|-------------|-------------|
| S  | -2.85313800 | -1.38344400 | 0.47813300  |
| O  | -1.72274400 | -0.43536200 | 1.11267600  |
| O  | -2.88702000 | -2.75361800 | 1.12802300  |
| C  | -4.43620700 | -0.49249500 | 1.05710700  |
| O  | -2.84228000 | -1.25487200 | -1.04925300 |
| Ni | -0.47694200 | -0.18101200 | -0.28978600 |
| F  | -5.47519600 | -1.16292100 | 0.60876400  |
| F  | -4.44461600 | -0.45205300 | 2.37026900  |
| F  | -4.44043400 | 0.73123900  | 0.56273800  |
| C  | -2.05893700 | 2.41510600  | -0.15113100 |
| C  | -0.62396200 | 1.99977700  | -2.04373700 |
| C  | -1.24623000 | 2.99685700  | -2.77997300 |
| C  | -2.30386600 | 3.69080200  | -2.19300300 |
| C  | -2.70945900 | 3.40030800  | -0.89157400 |
| H  | -2.35034100 | 2.21105200  | 0.87691100  |
| H  | -0.91728500 | 3.21552500  | -3.79469000 |
| H  | -2.81382900 | 4.47113100  | -2.75488900 |
| H  | -3.53496800 | 3.95486100  | -0.44900500 |
| C  | 0.47081600  | 1.18716800  | -2.60445100 |
| O  | 1.28702500  | 1.49385700  | -3.42633400 |
| N  | 0.38847800  | -0.17293900 | -2.02268100 |
| H  | -0.43569500 | -0.61631900 | -2.45937800 |
| C  | 1.50659000  | -1.09381100 | -2.01921800 |
| C  | 1.46855900  | -1.98230100 | -0.92409300 |
| C  | 2.52675100  | -1.15090900 | -2.93174700 |
| C  | 2.48238300  | -2.94669700 | -0.75392900 |
| C  | 3.54594200  | -2.11580700 | -2.76033000 |
| H  | 2.56126500  | -0.45091000 | -3.76030200 |
| C  | 0.42855700  | -2.57641500 | 1.07032600  |
| C  | 2.41130300  | -3.75393900 | 0.40213700  |
| C  | 3.52620600  | -2.99519100 | -1.70750900 |
| H  | 4.35998000  | -2.14905700 | -3.48069000 |
| C  | 1.39571200  | -3.56944400 | 1.30692400  |
| H  | -0.37749200 | -2.37957300 | 1.77376100  |
| H  | 3.18173700  | -4.50530300 | 0.57304600  |

|   |             |             |             |
|---|-------------|-------------|-------------|
| H | 4.32279100  | -3.72668100 | -1.57827200 |
| H | 1.33068400  | -4.16226500 | 2.21450900  |
| N | 0.45776600  | -1.82691700 | -0.01764300 |
| C | -1.00695500 | 1.69485000  | -0.71926500 |
| S | 2.12697600  | 0.88500200  | 1.29017100  |
| O | 1.40583200  | 1.90476400  | 0.30382400  |
| O | 3.05514800  | -0.07507500 | 0.55454700  |
| C | 3.27435400  | 2.07896300  | 2.23038000  |
| O | 1.16187500  | 0.32120400  | 2.32771100  |
| H | 0.06495200  | 1.62098800  | 0.00615800  |
| F | 4.09552900  | 2.64558000  | 1.37199600  |
| F | 2.54144400  | 2.99067800  | 2.83363900  |
| F | 3.95498800  | 1.38423700  | 3.11984100  |

**TS19-24**

|    |             |             |             |
|----|-------------|-------------|-------------|
| S  | 1.12934100  | 2.60196400  | 1.09592800  |
| O  | 0.15836300  | 1.68046700  | 1.95745900  |
| O  | 2.15134100  | 3.45290900  | 1.79752500  |
| C  | -0.05914200 | 3.78234200  | 0.15535400  |
| O  | 1.58351600  | 1.53863700  | 0.01253100  |
| Ni | 0.30676300  | 0.23019000  | 0.71357200  |
| F  | 0.67861200  | 4.56082800  | -0.60040000 |
| F  | -0.71011400 | 4.47960500  | 1.05405400  |
| F  | -0.87234400 | 3.05787400  | -0.56628100 |
| C  | -1.46048600 | -3.15191700 | 3.30383900  |
| C  | -0.55427700 | -2.29955900 | 1.25962900  |
| C  | -0.94941900 | -0.99369400 | 1.60343100  |
| C  | -1.57218600 | -0.78154800 | 2.83879400  |
| C  | -1.83629700 | -1.85975700 | 3.67676200  |
| H  | -1.66754600 | -3.98637900 | 3.97133800  |
| H  | -1.87496800 | 0.22922800  | 3.11099200  |
| H  | -2.33411200 | -1.69766000 | 4.63114500  |
| C  | 0.25081700  | -2.46452800 | 0.04098400  |
| O  | 0.70069700  | -3.48084700 | -0.40775400 |
| N  | 0.48732900  | -1.14938300 | -0.60463900 |
| H  | -0.33793000 | -0.91663900 | -1.20634400 |
| C  | 1.68341700  | -1.05339200 | -1.38368500 |
| C  | 2.91997300  | -1.21088700 | -0.70472400 |
| C  | 1.63549500  | -0.74701300 | -2.71942900 |
| C  | 4.11809200  | -1.07255100 | -1.45160400 |
| C  | 2.83488400  | -0.61402200 | -3.45134700 |
| H  | 0.67029500  | -0.60157900 | -3.20384700 |
| C  | 4.05165800  | -1.58164600 | 1.24419800  |
| C  | 5.33293000  | -1.22419500 | -0.74640000 |

|   |             |             |             |
|---|-------------|-------------|-------------|
| C | 4.04949300  | -0.77952400 | -2.83519700 |
| H | 2.78513600  | -0.37749400 | -4.51177700 |
| C | 5.30442500  | -1.47845500 | 0.60020000  |
| H | 4.01086500  | -1.77288300 | 2.31794700  |
| H | 6.27667300  | -1.12833900 | -1.28351900 |
| H | 4.97780400  | -0.67758200 | -3.39686800 |
| H | 6.22015500  | -1.59369200 | 1.17497400  |
| N | 2.89726300  | -1.45899500 | 0.62809700  |
| C | -0.80783200 | -3.37963000 | 2.09644100  |
| H | -0.46672600 | -4.37211500 | 1.80737300  |
| S | -2.83439900 | 0.42564500  | -1.30275600 |
| O | -2.48918000 | 0.65953900  | 0.22740800  |
| O | -3.61853900 | 1.55565100  | -1.92585600 |
| C | -3.98787600 | -1.08387400 | -1.17799700 |
| O | -1.62043600 | -0.14355700 | -2.06413900 |
| H | -1.57589400 | -0.19658500 | 0.76155900  |
| F | -4.34563300 | -1.46010800 | -2.38481700 |
| F | -5.04224600 | -0.77491200 | -0.45902800 |
| F | -3.30076800 | -2.04950700 | -0.58584300 |

#### TS19-25

|    |             |             |             |
|----|-------------|-------------|-------------|
| S  | 2.96725100  | -0.29323800 | -0.96823500 |
| O  | 2.31367100  | -1.52876000 | -1.70886400 |
| O  | 3.87879800  | 0.59066600  | -1.77612900 |
| C  | 3.97888200  | -1.11676600 | 0.42977400  |
| O  | 1.79274500  | 0.35625700  | -0.14494900 |
| S  | -0.70895400 | 2.96053500  | -0.33746400 |
| O  | -0.08814600 | 1.83199800  | -1.28401500 |
| O  | -1.01929000 | 4.20095200  | -1.14665600 |
| C  | 0.77824600  | 3.40445600  | 0.77839700  |
| O  | -1.73945500 | 2.40040700  | 0.64009700  |
| Ni | 0.00424400  | 0.03321200  | -0.74240400 |
| F  | 0.48189000  | 4.50620800  | 1.43899300  |
| F  | 1.84668500  | 3.58465900  | 0.03992000  |
| F  | 0.97472700  | 2.41597600  | 1.63601300  |
| F  | 3.23816600  | -2.08182600 | 0.91906300  |
| F  | 5.08515000  | -1.59357900 | -0.09044600 |
| F  | 4.23907700  | -0.21108600 | 1.33843800  |
| C  | -0.98248100 | -4.51916500 | 0.29150900  |
| C  | -0.14140700 | -2.33538200 | 0.84522900  |
| C  | 0.02468500  | -2.01804000 | -0.52004000 |
| C  | -0.36907700 | -2.98681700 | -1.46010300 |
| C  | -0.87197700 | -4.22082800 | -1.06418500 |
| H  | -1.36294500 | -5.48939300 | 0.60642100  |



|   |             |             |             |
|---|-------------|-------------|-------------|
| H | 1.16980300  | -1.65251500 | -1.07058500 |
| H | -0.21625500 | -2.77917600 | -2.52123100 |
| H | -1.16105200 | -4.95863200 | -1.81056800 |
| C | 0.05773100  | -1.25135300 | 1.85704200  |
| O | 0.90057900  | -1.24837600 | 2.72496500  |
| N | -0.81912400 | -0.18563000 | 1.63801400  |
| H | -0.63758600 | 0.62634300  | 2.22648600  |
| C | -2.19922400 | -0.38868700 | 1.32116300  |
| C | -2.68300700 | -0.33000000 | -0.01539100 |
| C | -3.09734800 | -0.58175800 | 2.34518400  |
| C | -4.07937300 | -0.44843800 | -0.25519800 |
| C | -4.48070300 | -0.71401900 | 2.10839000  |
| H | -2.71555300 | -0.61619500 | 3.36469600  |
| C | -2.29102700 | -0.01593300 | -2.29832300 |
| C | -4.54095300 | -0.34180100 | -1.58484400 |
| C | -4.96470400 | -0.64678300 | 0.82978100  |
| H | -5.15612300 | -0.86060400 | 2.94806400  |
| C | -3.65613700 | -0.11624900 | -2.60709000 |
| H | -1.54757400 | 0.18073100  | -3.06883000 |
| H | -5.60999600 | -0.42758300 | -1.77704400 |
| H | -6.03090900 | -0.73432400 | 0.62527200  |
| H | -3.98237900 | -0.00822400 | -3.63729800 |
| N | -1.83378600 | -0.14058300 | -1.06620200 |
| C | -0.61662800 | -3.57605700 | 1.24948500  |
| H | -0.72611400 | -3.79022100 | 2.31234000  |

**TS19-22**

|    |             |             |             |
|----|-------------|-------------|-------------|
| S  | 1.56454600  | 2.29644000  | -0.02753100 |
| O  | 1.56121600  | 2.03990000  | 1.48533900  |
| O  | 2.80842200  | 2.78953300  | -0.73384100 |
| C  | 0.26365700  | 3.66906800  | -0.25855100 |
| O  | 0.85924300  | 1.08317900  | -0.79686400 |
| Ni | -0.32832000 | 0.11919000  | 0.30653200  |
| F  | -0.84614000 | 3.30589900  | 0.36121200  |
| F  | 0.03340600  | 3.82948400  | -1.54182300 |
| F  | 0.72592900  | 4.78304800  | 0.26891000  |
| C  | -2.42430500 | -0.61693000 | 4.41353300  |
| C  | -0.68277400 | -1.02675500 | 2.82010500  |
| C  | -1.49358100 | -0.58011600 | 1.75809300  |
| C  | -2.77825100 | -0.11927100 | 2.07092400  |
| C  | -3.23475200 | -0.13505500 | 3.38700400  |
| H  | -2.79330900 | -0.62871000 | 5.43711900  |
| H  | -3.43458200 | 0.23115600  | 1.27608200  |
| H  | -4.23453400 | 0.23018000  | 3.61531100  |

|   |             |             |             |
|---|-------------|-------------|-------------|
| C | 0.70815000  | -1.36306600 | 2.51103900  |
| O | 1.48654900  | -1.99098800 | 3.17198900  |
| N | 1.11423100  | -0.76192400 | 1.21195700  |
| H | 1.77729700  | 0.01878600  | 1.41532700  |
| C | 1.74794300  | -1.67077300 | 0.29377500  |
| C | 3.01566600  | -1.30139900 | -0.22524700 |
| C | 1.12193900  | -2.82286900 | -0.11588400 |
| C | 3.62508000  | -2.14535400 | -1.18939400 |
| C | 1.74586100  | -3.66313100 | -1.06045800 |
| H | 0.13726900  | -3.08213300 | 0.27362700  |
| C | 4.71662000  | 0.22213800  | -0.30869100 |
| C | 4.87148600  | -1.72080300 | -1.70569700 |
| C | 2.96912700  | -3.33250200 | -1.58957300 |
| H | 1.23753500  | -4.57088900 | -1.37669300 |
| C | 5.41515900  | -0.53926100 | -1.27372200 |
| H | 5.11482500  | 1.17736500  | 0.03539300  |
| H | 5.37645000  | -2.33602100 | -2.45045000 |
| H | 3.44522000  | -3.97339000 | -2.33116600 |
| H | 6.36379600  | -0.17713300 | -1.66258600 |
| N | 3.56916800  | -0.14820600 | 0.20985600  |
| C | -1.13882500 | -1.06633000 | 4.13350600  |
| H | -0.47038700 | -1.41623500 | 4.91859500  |
| S | -2.19190400 | -0.78311300 | -1.58496300 |
| O | -2.24435400 | -1.87763200 | -0.43053600 |
| O | -1.79891500 | 0.57176100  | -0.87936600 |
| C | -4.03494200 | -0.49705700 | -1.99001800 |
| O | -1.49237000 | -1.18878800 | -2.85523700 |
| H | -1.68945300 | -1.28569000 | 0.59430300  |
| F | -4.52305300 | -1.61876500 | -2.45967000 |
| F | -4.10694800 | 0.45979100  | -2.88066400 |
| F | -4.64998500 | -0.15121800 | -0.88095400 |

**TS19-23**

|    |             |             |             |
|----|-------------|-------------|-------------|
| S  | -0.52322900 | -2.50878100 | 0.11093800  |
| O  | -1.11020700 | -1.69405400 | 1.26025700  |
| O  | -1.31027600 | -3.62433300 | -0.54809000 |
| C  | 1.04020700  | -3.37614700 | 0.81057500  |
| O  | 0.08850400  | -1.51909800 | -0.99100600 |
| Ni | 0.23073500  | 0.26636300  | -0.41156800 |
| F  | 1.60810500  | -2.60917600 | 1.71439100  |
| F  | 1.86942400  | -3.61382800 | -0.18054000 |
| F  | 0.65302500  | -4.50884600 | 1.36256200  |
| C  | -0.38042400 | 4.73973400  | 0.93117500  |
| C  | -0.71549600 | 2.90973000  | -0.57370600 |

|   |             |             |             |
|---|-------------|-------------|-------------|
| C | 0.38660000  | 2.21532900  | -0.04172400 |
| C | 1.05810500  | 2.80176000  | 1.03998300  |
| C | 0.67520500  | 4.04919900  | 1.52484400  |
| H | -0.66666900 | 5.72049400  | 1.30693500  |
| H | 1.90674900  | 2.28323100  | 1.48185300  |
| H | 1.20515300  | 4.49139500  | 2.36655000  |
| C | -1.59050500 | 2.19353400  | -1.50807000 |
| O | -2.42185500 | 2.63668400  | -2.24670800 |
| N | -1.33271100 | 0.70737000  | -1.46442200 |
| H | -1.04397700 | 0.42381900  | -2.40789500 |
| C | -2.51092400 | -0.07149900 | -1.14174200 |
| C | -3.26007500 | 0.30334500  | 0.00190100  |
| C | -2.84435400 | -1.18419200 | -1.86763500 |
| C | -4.35108900 | -0.51222700 | 0.39824400  |
| C | -3.93411900 | -1.98741200 | -1.46779900 |
| H | -2.23466200 | -1.48636700 | -2.71791400 |
| C | -3.57513200 | 1.75737500  | 1.73884300  |
| C | -5.05574600 | -0.11260800 | 1.55409300  |
| C | -4.67150900 | -1.66362400 | -0.35968700 |
| H | -4.16060300 | -2.88463700 | -2.03784700 |
| C | -4.66996900 | 1.01729200  | 2.23133600  |
| H | -3.25097400 | 2.66666000  | 2.25063700  |
| H | -5.89858600 | -0.71368200 | 1.89525800  |
| H | -5.50270000 | -2.29166000 | -0.04122700 |
| H | -5.19077900 | 1.34642600  | 3.12723900  |
| N | -2.89563200 | 1.42072200  | 0.66612500  |
| C | -1.08730600 | 4.16886200  | -0.12246300 |
| H | -1.95609600 | 4.65692300  | -0.56172900 |
| S | 3.01801200  | 0.15326500  | -0.69082300 |
| O | 2.60657700  | 1.53885900  | -1.34924700 |
| O | 1.92438300  | -0.12294200 | 0.41655000  |
| C | 4.54352000  | 0.59829800  | 0.36936200  |
| O | 3.42708900  | -0.95525300 | -1.62302500 |
| H | 1.41569300  | 1.80795200  | -0.83382300 |
| F | 5.53610400  | 0.85571500  | -0.44635100 |
| F | 4.81693800  | -0.42894700 | 1.13433100  |
| F | 4.25230300  | 1.65547100  | 1.09416900  |

**TS38-39**

|   |             |            |             |
|---|-------------|------------|-------------|
| S | -4.21332400 | 1.31304800 | 0.95809900  |
| O | -3.94621100 | 2.42006200 | 1.96966500  |
| O | -4.42981600 | 1.66528000 | -0.50802800 |
| C | -5.83839900 | 0.49863700 | 1.53038100  |
| O | -3.21310400 | 0.08821700 | 1.14417500  |

|    |             |             |             |
|----|-------------|-------------|-------------|
| Ni | -1.70297800 | 0.16918000  | -0.06004100 |
| F  | -6.14015400 | -0.49806800 | 0.71771800  |
| F  | -6.79417200 | 1.40466200  | 1.49743600  |
| F  | -5.68489600 | 0.04684300  | 2.75815400  |
| C  | -2.99826800 | -3.13743200 | -0.20954600 |
| C  | -1.88362500 | -1.37377800 | -1.42505200 |
| C  | -3.12698400 | -0.91625400 | -1.90881300 |
| C  | -4.29578700 | -1.56531800 | -1.53271900 |
| C  | -4.22176100 | -2.67650300 | -0.70041300 |
| H  | -2.97548700 | -3.98785700 | 0.47012800  |
| H  | -3.17703200 | -0.04037600 | -2.55430200 |
| H  | -5.25808100 | -1.17924300 | -1.86003600 |
| H  | -5.13936800 | -3.17931400 | -0.39781500 |
| C  | -0.55767400 | -0.81100400 | -1.89577100 |
| O  | 0.18707500  | -1.31901100 | -2.71664600 |
| N  | -0.63873100 | 0.68791200  | -1.75864600 |
| H  | -0.94635600 | 1.08438900  | -2.65299200 |
| C  | 0.48996200  | 1.40413300  | -1.26053800 |
| C  | 0.39724200  | 1.86555900  | 0.07440600  |
| C  | 1.60544000  | 1.70050100  | -2.00653000 |
| C  | 1.42750100  | 2.65846900  | 0.62994100  |
| C  | 2.64651100  | 2.47645800  | -1.45030400 |
| H  | 1.67529600  | 1.32289500  | -3.02516500 |
| C  | -0.84654000 | 1.94792300  | 2.04639000  |
| C  | 1.25213000  | 3.11052300  | 1.95882300  |
| C  | 2.55980400  | 2.95429900  | -0.16600900 |
| H  | 3.52263200  | 2.69927200  | -2.05561600 |
| C  | 0.11996100  | 2.77253400  | 2.65585200  |
| H  | -1.75401200 | 1.64242500  | 2.56450300  |
| H  | 2.02514600  | 3.72972200  | 2.41364800  |
| H  | 3.35662300  | 3.56341300  | 0.25910100  |
| H  | -0.04550300 | 3.11612700  | 3.67305100  |
| N  | -0.70354200 | 1.51103400  | 0.80907000  |
| C  | -1.82171200 | -2.49353900 | -0.55822100 |
| C  | -0.44031700 | -2.79456500 | -0.03537000 |
| C  | 0.31294000  | -1.44757700 | 0.00438300  |
| C  | 0.60290100  | -1.25353800 | 1.49815500  |
| C  | -0.40433900 | -3.25875600 | 1.43155900  |
| H  | 0.83121500  | -0.22750700 | 1.81144900  |
| H  | 0.03923100  | -3.53285700 | -0.69832300 |
| H  | 1.23655700  | -1.41035900 | -0.58521700 |
| H  | -1.12018900 | -4.05562700 | 1.67111300  |
| C  | 1.05008600  | -3.61894100 | 1.76658400  |
| H  | 1.49429100  | -4.27919600 | 1.00922700  |

|   |             |             |            |
|---|-------------|-------------|------------|
| H | 1.10519200  | -4.14508000 | 2.72893000 |
| C | -0.57781700 | -1.93794300 | 2.19333200 |
| H | -1.54792500 | -1.44818100 | 2.02943600 |
| H | -0.42262800 | -2.05625500 | 3.27543400 |
| C | 1.74411400  | -2.23607900 | 1.84203600 |
| H | 2.59288100  | -2.14209500 | 1.15211100 |
| H | 2.12315300  | -2.03704300 | 2.85582000 |

**IM17**

|    |             |             |             |
|----|-------------|-------------|-------------|
| S  | -0.58298400 | 3.74782500  | -1.55098600 |
| O  | 0.57457700  | 4.75276000  | -2.25740400 |
| O  | 0.21748900  | 2.56514300  | -1.02996300 |
| C  | -0.89031500 | 5.06730000  | -0.14245400 |
| O  | -1.74432700 | 3.67365500  | -2.50643400 |
| Ni | -2.47169100 | -0.90393900 | 0.33403500  |
| C  | -2.35902500 | -1.39811000 | -4.35888700 |
| C  | -2.12537800 | -2.12506700 | -2.08302500 |
| C  | -2.23199100 | -0.80401400 | -1.59557400 |
| C  | -2.36711900 | 0.22031800  | -2.54539700 |
| C  | -2.40953000 | -0.07875700 | -3.91085500 |
| H  | -2.41943900 | -1.61776900 | -5.42431900 |
| H  | -0.56327200 | -5.16681900 | -1.86644100 |
| H  | -2.43332200 | 1.26342500  | -2.23834900 |
| H  | -2.49713000 | 0.73829400  | -4.62819500 |
| C  | -1.90633600 | -3.17402800 | -1.06260700 |
| O  | -1.95365300 | -4.39076800 | -1.31181500 |
| N  | -1.70960600 | -2.61526400 | 0.15775300  |
| C  | -1.63866800 | -3.34273700 | 1.33060100  |
| C  | -1.97392500 | -2.58632500 | 2.49021000  |
| C  | -1.27828400 | -4.67238000 | 1.50103200  |
| C  | -1.90658400 | -3.14376700 | 3.79061300  |
| C  | -1.24271000 | -5.23197500 | 2.79410000  |
| H  | -1.02307100 | -5.27137800 | 0.63460000  |
| C  | -2.61765300 | -0.51372100 | 3.30472000  |
| C  | -2.19610600 | -2.28010900 | 4.87149400  |
| C  | -1.53375100 | -4.50137600 | 3.92430900  |
| H  | -0.95892700 | -6.27938900 | 2.89319000  |
| C  | -2.53255800 | -0.96961400 | 4.63451200  |
| H  | -2.91657100 | 0.50629500  | 3.06656200  |
| H  | -2.14024100 | -2.66825700 | 5.88891400  |
| H  | -1.48534800 | -4.94880500 | 4.91646000  |
| H  | -2.74985800 | -0.28365700 | 5.44931800  |
| N  | -2.35403300 | -1.29409700 | 2.27562200  |
| C  | -2.22896200 | -2.43276700 | -3.43542800 |

|    |             |             |             |
|----|-------------|-------------|-------------|
| H  | -2.18804700 | -3.47883400 | -3.74240700 |
| F  | -1.88210200 | 4.77667300  | 0.65372500  |
| F  | -1.14714100 | 6.19049900  | -0.77763100 |
| F  | 0.23294100  | 5.14748700  | 0.52754400  |
| C  | 1.29452200  | -4.90356400 | -1.63557700 |
| O  | 0.28501200  | -5.59545100 | -2.16103000 |
| O  | 1.15204700  | -3.92705700 | -0.92888600 |
| Ag | -0.05803000 | -0.18170700 | -0.70126100 |
| C  | 2.30604600  | 0.11060900  | 1.67567600  |
| C  | 3.16674200  | -0.73987000 | 0.98937700  |
| C  | 3.11471800  | -2.15227600 | 1.19157800  |
| C  | 2.14236800  | -2.69018800 | 2.08155400  |
| C  | 1.25332800  | -1.80744100 | 2.73246400  |
| C  | 1.33389300  | -0.45163600 | 2.54205200  |
| H  | 4.78053100  | -2.65121200 | -0.11067800 |
| C  | 4.03562700  | -3.04381000 | 0.58138300  |
| C  | 2.11799100  | -4.08310300 | 2.33079800  |
| H  | 0.52237900  | -2.22186700 | 3.42780200  |
| H  | 0.65699300  | 0.20584000  | 3.08532300  |
| C  | 3.03751100  | -4.91378600 | 1.74594000  |
| C  | 4.00759300  | -4.38437800 | 0.86762600  |
| H  | 1.35711600  | -4.47231900 | 3.00834700  |
| H  | 3.02469100  | -5.98233200 | 1.95710800  |
| H  | 4.73949100  | -5.04898600 | 0.40972200  |
| C  | 8.16477700  | 0.36855300  | 1.52886000  |
| C  | 7.87496800  | 0.63989400  | 0.21605600  |
| C  | 6.57090500  | 0.43388200  | -0.29279200 |
| C  | 5.54771700  | -0.04943300 | 0.57138900  |
| C  | 7.15973300  | -0.13149600 | 2.38400900  |
| H  | 7.04812300  | 1.02766700  | -2.31773200 |
| H  | 9.17047300  | 0.53083800  | 1.91331800  |
| H  | 8.64287000  | 1.01603000  | -0.46047400 |
| C  | 6.25847400  | 0.68354200  | -1.64913600 |
| C  | 4.21589400  | -0.21459300 | 0.07071300  |
| H  | 7.39255300  | -0.34426000 | 3.42616500  |
| C  | 3.94115100  | 0.05381400  | -1.26202100 |
| C  | 4.98966100  | 0.48931000  | -2.12016200 |
| H  | 4.77683000  | 0.68096000  | -3.17053500 |
| P  | 2.52345400  | 1.96074300  | 1.44692800  |
| P  | 2.23345400  | -0.17081600 | -1.94536200 |
| C  | 5.88609500  | -0.33799300 | 1.91770400  |
| H  | 5.11631500  | -0.71757600 | 2.58707000  |
| C  | 2.41110200  | -1.61448200 | -3.09521000 |
| C  | 1.23543500  | -2.22437300 | -3.54016600 |

|   |             |             |             |
|---|-------------|-------------|-------------|
| C | 3.63751900  | -2.08095000 | -3.57770500 |
| C | 1.27520700  | -3.23526000 | -4.49433100 |
| H | 0.27171700  | -1.92564800 | -3.12598800 |
| C | 3.67802100  | -3.10304700 | -4.52102300 |
| H | 4.57177900  | -1.65412900 | -3.21672600 |
| C | 2.49851700  | -3.67230400 | -4.99248400 |
| H | 0.34477100  | -3.69657600 | -4.82289000 |
| H | 4.64011200  | -3.45660300 | -4.88936700 |
| H | 2.53480000  | -4.46969600 | -5.73322600 |
| C | 2.09857100  | 1.22763400  | -3.16957000 |
| C | 2.84531200  | 2.40557600  | -3.06165400 |
| C | 1.14300000  | 1.13059500  | -4.18513200 |
| C | 2.69368800  | 3.42738800  | -3.99871500 |
| H | 3.55303700  | 2.53356000  | -2.24348300 |
| C | 0.96135400  | 2.16912100  | -5.09347800 |
| H | 0.51984600  | 0.23903900  | -4.27099500 |
| C | 1.74691200  | 3.31402100  | -5.01590600 |
| H | 3.30804400  | 4.32436400  | -3.92147600 |
| H | 0.20168600  | 2.07650500  | -5.86764500 |
| H | 1.61490100  | 4.12074900  | -5.73410100 |
| C | 1.12269100  | 2.63309000  | 2.46388000  |
| C | 1.32318700  | 3.54295400  | 3.50709400  |
| C | -0.19195700 | 2.32909300  | 2.08813600  |
| C | 0.23993800  | 4.11035500  | 4.17292900  |
| H | 2.33455900  | 3.81561400  | 3.80574800  |
| C | -1.27169800 | 2.88158200  | 2.76587700  |
| H | -0.40065200 | 1.67666700  | 1.23811700  |
| C | -1.06098000 | 3.77479500  | 3.81265200  |
| H | 0.41811700  | 4.81935800  | 4.98063300  |
| H | -2.27727900 | 2.63614700  | 2.42265900  |
| H | -1.90670200 | 4.22035000  | 4.33493100  |
| C | 3.95366100  | 2.23592800  | 2.60612900  |
| C | 5.02062300  | 3.01230300  | 2.15007700  |
| C | 4.00988000  | 1.70024900  | 3.89819200  |
| C | 6.12443800  | 3.25162700  | 2.96484500  |
| H | 4.98981300  | 3.41625200  | 1.13632900  |
| C | 5.10554000  | 1.94500300  | 4.71644500  |
| H | 3.18293800  | 1.08744000  | 4.26127100  |
| C | 6.16580100  | 2.72080100  | 4.24894800  |
| H | 6.95565500  | 3.84871600  | 2.59248400  |
| H | 5.13659500  | 1.52814100  | 5.72242900  |
| H | 7.02631700  | 2.90991800  | 4.88939600  |
| C | 2.62310900  | -5.49677700 | -2.00960300 |
| H | 2.55769500  | -6.03992600 | -2.95741100 |

|   |             |             |             |
|---|-------------|-------------|-------------|
| H | 2.92966900  | -6.20201600 | -1.22632500 |
| H | 3.37472300  | -4.70357000 | -2.07489700 |
| C | -5.65208200 | 4.45208700  | -1.63870900 |
| C | -4.60151800 | 2.44378600  | -0.79869700 |
| C | -5.52599100 | 1.67691400  | -1.51476100 |
| C | -6.50199900 | 2.29356200  | -2.28719100 |
| C | -6.57380600 | 3.68283500  | -2.34234300 |
| H | -5.69770100 | 5.53898300  | -1.68782500 |
| H | -5.46535100 | 0.58910500  | -1.47770800 |
| H | -7.20858300 | 1.68602200  | -2.85056500 |
| H | -7.34406700 | 4.16652200  | -2.94152600 |
| C | -3.47565400 | 1.78453100  | -0.05362900 |
| O | -2.34837000 | 2.29326400  | -0.09231900 |
| N | -3.68776300 | 0.58510900  | 0.54512400  |
| H | 1.27529300  | 4.14710600  | -2.58804200 |
| C | -4.92538200 | 0.29338600  | 1.10675200  |
| C | -5.44524300 | -1.04115600 | 1.03881300  |
| C | -5.66752100 | 1.23551900  | 1.80807200  |
| C | -6.69904700 | -1.35310400 | 1.63553100  |
| C | -6.91613100 | 0.92389700  | 2.37516900  |
| H | -5.26939300 | 2.24575300  | 1.90788500  |
| C | -5.13970400 | -3.21317800 | 0.33225100  |
| C | -7.14054800 | -2.69350000 | 1.53513800  |
| C | -7.43642000 | -0.34501600 | 2.29647200  |
| H | -7.46520300 | 1.70665700  | 2.89692100  |
| C | -6.36999200 | -3.62546000 | 0.88936900  |
| H | -4.49289000 | -3.93174700 | -0.17938600 |
| H | -8.09638500 | -2.96762300 | 1.98345300  |
| H | -8.39785300 | -0.59314900 | 2.74542100  |
| H | -6.68501000 | -4.66315400 | 0.80438000  |
| N | -4.70257600 | -1.97610000 | 0.39733800  |
| C | -4.66116600 | 3.83448100  | -0.88484500 |
| H | -3.92180100 | 4.42901600  | -0.35428500 |

### IM18

|    |             |             |             |
|----|-------------|-------------|-------------|
| S  | 0.14415800  | -4.09745800 | 1.78561300  |
| O  | 1.14948800  | -4.82740300 | 2.67650800  |
| O  | 0.76622600  | -2.89134100 | 1.00293200  |
| C  | -0.12687700 | -5.33922600 | 0.35762600  |
| O  | -1.23939100 | -3.81137300 | 2.36535400  |
| Ni | -2.75706700 | 0.95716700  | -0.27797000 |
| C  | -1.72414700 | 1.60937400  | 4.26490300  |
| C  | -2.10314100 | 2.31923100  | 2.00127800  |
| C  | -2.38574300 | 1.00299400  | 1.62248700  |



|    |             |             |             |
|----|-------------|-------------|-------------|
| C  | -2.33926000 | -0.02064300 | 2.56586700  |
| C  | -1.97721400 | 0.29413800  | 3.88340400  |
| H  | -1.44864000 | 1.83110800  | 5.29424700  |
| H  | -1.01321500 | 5.73558900  | 1.73256900  |
| H  | -2.54400400 | -1.06267900 | 2.32732000  |
| H  | -1.87292900 | -0.51819300 | 4.60302600  |
| C  | -2.03305400 | 3.31523400  | 0.91101100  |
| O  | -2.08863700 | 4.54224100  | 1.06915900  |
| N  | -1.95166700 | 2.66291100  | -0.27852100 |
| C  | -1.77638900 | 3.23140600  | -1.53306400 |
| C  | -2.01930300 | 2.33569900  | -2.61055500 |
| C  | -1.34186700 | 4.51407500  | -1.83032000 |
| C  | -1.75578800 | 2.70320300  | -3.95317500 |
| C  | -1.11424400 | 4.88608700  | -3.16967000 |
| H  | -1.12725100 | 5.19993700  | -1.01914800 |
| C  | -2.64604500 | 0.18683800  | -3.22156200 |
| C  | -1.94470400 | 1.70578100  | -4.93839900 |
| C  | -1.29824600 | 4.01354300  | -4.21843900 |
| H  | -0.76420800 | 5.89808000  | -3.36935900 |
| C  | -2.37151700 | 0.45106600  | -4.57715400 |
| H  | -2.98024800 | -0.79988600 | -2.89998800 |
| H  | -1.73412200 | 1.94650800  | -5.98035200 |
| H  | -1.09563200 | 4.31239000  | -5.24606400 |
| H  | -2.49170700 | -0.34501900 | -5.30737400 |
| N  | -2.48609900 | 1.09828900  | -2.28539100 |
| C  | -1.81088500 | 2.63171000  | 3.32592000  |
| H  | -1.61748600 | 3.67268600  | 3.58959600  |
| F  | -1.08283400 | -4.90286400 | -0.45405800 |
| F  | -0.48784100 | -6.51000200 | 0.85251000  |
| F  | 0.99236900  | -5.46564500 | -0.32750300 |
| C  | 0.64091800  | 6.41839700  | 1.11709400  |
| O  | -0.31070000 | 6.36173800  | 2.05738500  |
| O  | 0.58436900  | 5.82680200  | 0.06430500  |
| Ag | -0.07135800 | -0.74052600 | 0.98425000  |
| C  | 2.24357900  | -0.02478100 | -1.65010100 |
| C  | 3.10083300  | 0.62086500  | -0.76075800 |
| C  | 3.15160100  | 2.05199000  | -0.73304400 |
| C  | 2.27660000  | 2.80010500  | -1.57804000 |
| C  | 1.33966500  | 2.10929100  | -2.38113500 |
| C  | 1.33051200  | 0.73964200  | -2.42058300 |
| H  | 4.75877400  | 2.21813400  | 0.71208100  |
| C  | 4.08590600  | 2.76896100  | 0.05736900  |
| C  | 2.39751700  | 4.20712800  | -1.63882100 |
| H  | 0.66237700  | 2.68688400  | -3.01364600 |

|   |            |             |             |
|---|------------|-------------|-------------|
| H | 0.63905700 | 0.21394000  | -3.08155100 |
| C | 3.33095500 | 4.86395100  | -0.88164600 |
| C | 4.16908500 | 4.13790200  | -0.01040200 |
| H | 1.70689200 | 4.75549400  | -2.27976100 |
| H | 3.41318200 | 5.94884800  | -0.93730800 |
| H | 4.90498800 | 4.66336000  | 0.59900700  |
| C | 7.92166200 | -1.17019300 | -1.24765800 |
| C | 7.46842200 | -1.66355400 | -0.05129100 |
| C | 6.18378300 | -1.32003900 | 0.43503000  |
| C | 5.33933300 | -0.48194500 | -0.35199900 |
| C | 7.10829400 | -0.30298800 | -2.00683400 |
| H | 6.37873200 | -2.39535700 | 2.30237600  |
| H | 8.91311400 | -1.43854100 | -1.60945100 |
| H | 8.09559400 | -2.31967600 | 0.55417300  |
| C | 5.72872300 | -1.76191800 | 1.69703500  |
| C | 4.02535400 | -0.16856700 | 0.11447200  |
| H | 7.47370100 | 0.09471800  | -2.95239600 |
| C | 3.64168300 | -0.57286300 | 1.38767400  |
| C | 4.50464200 | -1.37412300 | 2.17339200  |
| H | 4.18347000 | -1.69211800 | 3.16504200  |
| P | 2.41370000 | -1.87829300 | -1.87367500 |
| P | 2.05453300 | 0.07380600  | 2.07309900  |
| C | 5.84974800 | 0.02802200  | -1.57436900 |
| H | 5.22694400 | 0.69181500  | -2.17072900 |
| C | 2.51669500 | 1.78128900  | 2.56778300  |
| C | 1.58987900 | 2.81563500  | 2.46413100  |
| C | 3.73826500 | 2.00591400  | 3.21170000  |
| C | 1.86520400 | 4.04915900  | 3.05366300  |
| H | 0.64880600 | 2.66419900  | 1.92836800  |
| C | 4.03078700 | 3.24882300  | 3.75439900  |
| H | 4.46186300 | 1.19341700  | 3.29613500  |
| C | 3.08361400 | 4.26817200  | 3.68777000  |
| H | 1.12573200 | 4.84684500  | 3.01353900  |
| H | 4.98616100 | 3.41546800  | 4.24993000  |
| H | 3.29175200 | 5.23848400  | 4.13849500  |
| C | 1.80578300 | -0.69363300 | 3.73445900  |
| C | 1.74373800 | -2.08529000 | 3.85662600  |
| C | 1.49103200 | 0.10519000  | 4.84075100  |
| C | 1.35634100 | -2.66994700 | 5.05742800  |
| H | 1.98651300 | -2.73443200 | 3.01559300  |
| C | 1.11063100 | -0.48543300 | 6.04186100  |
| H | 1.53633600 | 1.19180900  | 4.76458900  |
| C | 1.03486100 | -1.87190200 | 6.15029000  |
| H | 1.29577900 | -3.75522300 | 5.10999800  |

|   |             |             |             |
|---|-------------|-------------|-------------|
| H | 0.87069800  | 0.14469200  | 6.89672000  |
| H | 0.72463100  | -2.32906200 | 7.08883000  |
| C | 0.89760000  | -2.22944700 | -2.90306200 |
| C | 0.85457800  | -2.28827800 | -4.30041500 |
| C | -0.26653500 | -2.52705300 | -2.18870900 |
| C | -0.32408000 | -2.62109400 | -4.96278300 |
| H | 1.75203900  | -2.08681400 | -4.88415500 |
| C | -1.44798300 | -2.85107900 | -2.84963000 |
| H | -0.26149900 | -2.53706500 | -1.09986500 |
| C | -1.48200400 | -2.90601200 | -4.24056100 |
| H | -0.33305200 | -2.67086600 | -6.05192400 |
| H | -2.33423600 | -3.09000800 | -2.25662100 |
| H | -2.39876000 | -3.18077400 | -4.76100200 |
| C | 3.73673600  | -1.90188700 | -3.18751400 |
| C | 4.63235300  | -2.97280200 | -3.13079900 |
| C | 3.89751400  | -0.94144700 | -4.19173700 |
| C | 5.65977500  | -3.09131000 | -4.06378000 |
| H | 4.53299900  | -3.70742400 | -2.33167600 |
| C | 4.92015900  | -1.05971900 | -5.12774500 |
| H | 3.22117500  | -0.08457000 | -4.23380900 |
| C | 5.80041700  | -2.13775300 | -5.06604000 |
| H | 6.35541200  | -3.92694600 | -4.00061800 |
| H | 5.03162700  | -0.30555000 | -5.90744200 |
| H | 6.60162600  | -2.22763200 | -5.79841000 |
| C | 1.78592500  | 7.30967500  | 1.50045200  |
| H | 1.85894300  | 7.44573600  | 2.58472600  |
| H | 1.64767000  | 8.29672300  | 1.04198700  |
| H | 2.70556500  | 6.86593900  | 1.10471700  |
| C | -4.82214700 | -5.03194700 | 1.41343100  |
| C | -4.20899400 | -2.77508900 | 0.83146800  |
| C | -5.26880700 | -2.29417300 | 1.60851000  |
| C | -6.10125500 | -3.18062200 | 2.27955500  |
| C | -5.88852000 | -4.55218200 | 2.16780400  |
| H | -4.63735500 | -6.10317300 | 1.34761200  |
| H | -5.42479400 | -1.21953300 | 1.70184000  |
| H | -6.91436500 | -2.79998000 | 2.89322700  |
| H | -6.54543400 | -5.24762200 | 2.68750200  |
| C | -3.26378300 | -1.82421600 | 0.17430400  |
| O | -2.05374300 | -2.07081900 | 0.20576400  |
| N | -3.74548200 | -0.65070700 | -0.34030100 |
| C | -5.02563100 | -0.47884200 | -0.85576900 |
| C | -5.52005500 | 0.85721000  | -0.86082200 |
| C | -5.82175900 | -1.46285300 | -1.42257500 |
| C | -6.82586500 | 1.15760700  | -1.32108400 |

|   |             |             |             |
|---|-------------|-------------|-------------|
| C | -7.11852900 | -1.16259300 | -1.88204400 |
| H | -5.45315600 | -2.48498800 | -1.48971400 |
| C | -5.05244500 | 3.08393200  | -0.41853500 |
| C | -7.22118400 | 2.51458300  | -1.27278700 |
| C | -7.63158200 | 0.11343500  | -1.82425400 |
| H | -7.71992500 | -1.96875500 | -2.29565300 |
| C | -6.34712600 | 3.47182800  | -0.81978600 |
| H | -4.32339900 | 3.82312100  | -0.08316900 |
| H | -8.22262600 | 2.78711300  | -1.60716700 |
| H | -8.63387400 | 0.33705500  | -2.18655500 |
| H | -6.62786800 | 4.52094500  | -0.77603000 |
| N | -4.66416500 | 1.82622300  | -0.43665600 |
| C | -3.97021400 | -4.14798000 | 0.76128300  |
| H | -3.11691800 | -4.53196700 | 0.20920700  |
| H | -1.54068400 | 0.16236600  | -0.19969200 |
